# Supplementary material for: Dexfenfluramine and Pergolide Cause Heart Valve Disease via Valve Metabolic Reprogramming and Ongoing Matrix Remodeling
Source: PubMed Central journal article supplement (PMC7312197; doi:10.3390/ijms21114003), 2020-06-03
Supplement: ijms-21-04003-s001.pdf [file ijms-21-04003-s001.pdf]

## SUPPLEMENTARY MATERIAL

# Dexfenfluramine and Pergolide Cause Heart Valve Disease via Valve Metabolic Reprogramming and Ongoing Matrix Remodeling

Cécile Oury <sup>1\*</sup>, Patrick Maréchal <sup>1</sup>, Nathalie Donis <sup>1</sup>, Alexia Hulin <sup>1</sup>, Julien Tridetti <sup>1</sup>, Mai-Linh Nguyen <sup>1</sup>, Raluca Dulgheru <sup>1</sup>, Marianne Fillet <sup>2</sup>, Alain Nchimi <sup>1</sup> and Patrizio Lancellotti <sup>1,3\*</sup>

### Content:

Figure S1

Table S1

Table S2

**A**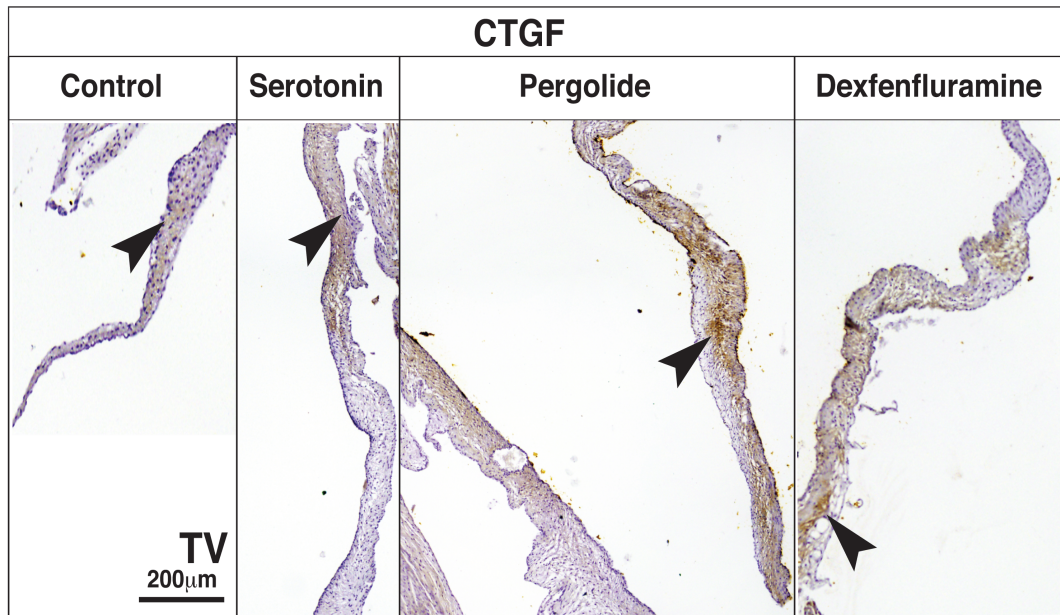**B**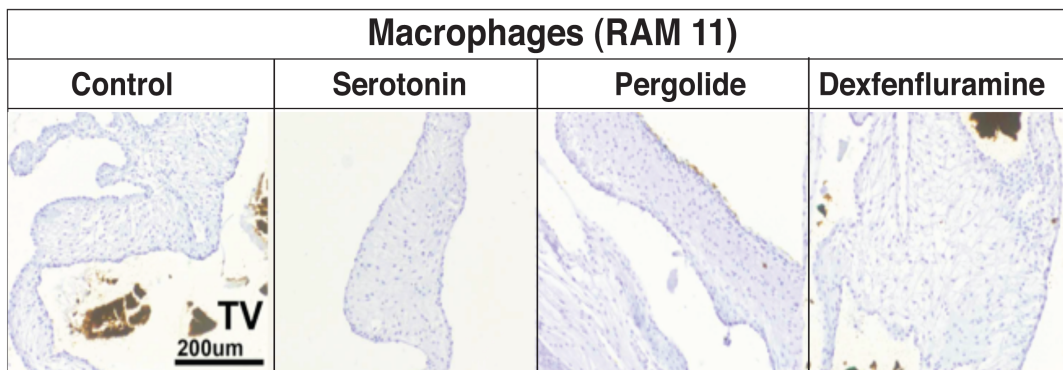

**Figure S1. A. CTGF-rich areas in tricuspid valve leaflets of drug-treated rabbits.** Representative anti-CTGF staining performed on sections of tricuspid valve (TV) leaflet from control, serotonin, pergolide and dexfenfluramine-treated rabbits, as indicated. Scale bar = 200µm. **B. Drug treatments do not promote macrophage infiltration in TV leaflet.** Representative macrophage (RAM11) staining performed on sections of tricuspid valve (TV) leaflet from control, serotonin, pergolide and dexfenfluramine-treated rabbits, as indicated. Scale bar = 200µm.

**Table S1. Full list of DEGs common and specific to the different treatment groups as compared to untreated controls**

| COMMON DEGs pergolide, dexfenfluramine, serotonin |           | Log FC    |           |                 |
|---------------------------------------------------|-----------|-----------|-----------|-----------------|
| ID                                                | GENE ID   | SEROTONIN | PERGOLIDE | DEXFENFLURAMINE |
| ENSOCUG00000009905                                | RPL37A    | 1,575     | 1,23      | 1,12            |
| ENSOCUG0000000658                                 | BMP3      | 0,968     | 0,85      | 0,97            |
| ENSOCUG00000009329                                | NR1D2     | 0,905     | 1,09      | 0,94            |
| ENSOCUG00000002898                                | FBLN7     | 0,905     | 1,35      | 0,68            |
| ENSOCUG00000016945                                | ITIH5     | 0,858     | 0,92      | 0,52            |
| ENSOCUG00000016964                                | MGP       | 0,814     | 0,77      | 0,68            |
| ENSOCUG00000013396                                | EDN1      | 0,813     | 0,59      | 0,60            |
| ENSOCUG00000012043                                | CAMKK1    | 0,811     | 0,96      | 0,98            |
| ENSOCUG00000017302                                | SLIT3     | 0,802     | 0,70      | 0,56            |
| ENSOCUG00000015234                                | COL14A1   | 0,738     | 0,78      | 0,60            |
| ENSOCUG00000024041                                | LXN       | 0,663     | 0,70      | 0,59            |
| ENSOCUG00000003155                                | PLAU      | 0,661     | 0,82      | 0,82            |
| ENSOCUG00000026419                                | C1QTNF3   | 0,643     | 0,87      | 0,53            |
| ENSOCUG00000016227                                | SVEP1     | 0,630     | 0,78      | 0,55            |
| ENSOCUG00000005778                                | CPED1     | 0,629     | 0,83      | 0,57            |
| ENSOCUG00000010718                                | TIMP1     | 0,613     | 0,50      | 0,64            |
| ENSOCUG00000006145                                | CHRD1     | 0,605     | 0,79      | 0,63            |
| ENSOCUG00000008037                                | FAM13A    | 0,590     | 0,64      | 0,34            |
| ENSOCUG00000016659                                | EMB       | 0,577     | 0,45      | 0,47            |
| ENSOCUG00000014803                                | RPF1      | 0,555     | 0,58      | 0,47            |
| ENSOCUG00000000338                                | ATP1B3    | 0,545     | 1,03      | 1,15            |
| ENSOCUG00000025358                                | PROS1     | 0,521     | 0,44      | 0,78            |
| ENSOCUG00000000713                                | TMEM135   | 0,518     | 0,84      | 0,65            |
| ENSOCUG00000005115                                | FAP       | 0,483     | 0,42      | 0,40            |
| ENSOCUG00000010772                                | DCHS2     | 0,481     | 0,96      | 0,38            |
| ENSOCUG00000004137                                | PRSS23    | 0,479     | 0,51      | 0,48            |
| ENSOCUG00000029492                                | SF3B1     | 0,475     | 0,298     | 0,41            |
| ENSOCUG00000024081                                | CD63      | 0,464     | 0,355     | 0,28            |
| ENSOCUG00000011150                                | TNFRSF11B | 0,449     | 0,67      | 0,52            |
| ENSOCUG00000012264                                | COL1A2    | 0,439     | 0,91      | 0,95            |
| ENSOCUG00000003706                                | RPL8      | 0,437     | 0,38      | 0,47            |
| ENSOCUG00000011090                                | CTSK      | 0,418     | 0,54      | 0,59            |
| ENSOCUG00000029387                                | ADD3      | 0,418     | 0,32      | 0,22            |
| ENSOCUG00000015749                                | RPS4X     | 0,416     | 1,25      | 1,33            |
| ENSOCUG00000029144                                | ZNF260    | 0,413     | 0,46      | 0,55            |
| ENSOCUG00000002392                                | RPL31     | 0,406     | 1,60      | 1,66            |
| ENSOCUG00000014975                                | OLFML1    | 0,405     | 0,53      | 0,31            |

|                    |          |        |       |       |
|--------------------|----------|--------|-------|-------|
| ENSOCUG00000013509 | SKIL     | 0,392  | 0,41  | 0,49  |
| ENSOCUG00000013281 | SFMBT2   | 0,391  | 0,45  | 0,61  |
| ENSOCUG00000016361 | CD302    | 0,382  | 0,45  | 0,38  |
| ENSOCUG00000014455 | ENPP1    | 0,364  | 0,38  | 0,40  |
| ENSOCUG00000017949 | HAO2     | 0,350  | 0,98  | 1,05  |
| ENSOCUG00000026336 | RPS19    | 0,343  | 0,62  | 0,62  |
| ENSOCUG00000013687 | IL13RA1  | 0,338  | 0,62  | 0,49  |
| ENSOCUG00000024991 | ALPK1    | 0,330  | 0,47  | 0,55  |
| ENSOCUG00000025870 | C5orf42  | 0,315  | 0,48  | 0,51  |
| ENSOCUG00000017627 | UGGT2    | 0,297  | 0,59  | 0,44  |
| ENSOCUG00000008254 | SEC24A   | 0,284  | 0,22  | 0,26  |
| ENSOCUG00000029127 | CD164    | 0,281  | 0,53  | 0,46  |
| ENSOCUG00000006321 | CNN3     | 0,271  | 0,40  | 0,46  |
| ENSOCUG00000012361 | ATF7IP   | 0,199  | 0,19  | 0,22  |
| ENSOCUG00000006646 | UBR3     | -0,187 | -0,24 | -0,39 |
| ENSOCUG00000012842 | HSP90AB1 | -0,204 | -0,45 | -0,57 |
| ENSOCUG00000004753 | KANK1    | -0,243 | -0,53 | -0,35 |
| ENSOCUG00000021353 | HECA     | -0,247 | -0,33 | -0,36 |
| ENSOCUG00000029143 | DSC3     | -0,263 | -0,28 | -0,30 |
| ENSOCUG00000017057 | SRPRA    | -0,267 | -0,22 | -0,22 |
| ENSOCUG00000029112 | ND5      | -0,267 | -0,97 | -1,63 |
| ENSOCUG00000000156 | TRAK2    | -0,269 | -0,49 | -0,76 |
| ENSOCUG00000007809 | ATP5F1   | -0,274 | -0,35 | -0,56 |
| ENSOCUG00000001430 | AHSA1    | -0,288 | -0,54 | -0,59 |
| ENSOCUG00000000706 | FHOD3    | -0,303 | -0,47 | -0,75 |
| ENSOCUG00000029103 | COX3     | -0,306 | -0,65 | -1,15 |
| ENSOCUG00000005218 | MTUS1    | -0,306 | -0,44 | -0,67 |
| ENSOCUG00000013064 | TLN2     | -0,312 | -0,22 | -0,31 |
| ENSOCUG00000015705 | MAST4    | -0,315 | -0,30 | -0,37 |
| ENSOCUG00000001629 | CWC15    | -0,316 | -0,28 | -0,42 |
| ENSOCUG00000003452 | PPM1K    | -0,327 | -0,73 | -0,94 |
| ENSOCUG00000010178 | IMMT     | -0,327 | -0,50 | -0,77 |
| ENSOCUG00000007441 | USP28    | -0,328 | -0,38 | -0,63 |
| ENSOCUG00000005926 | USP4     | -0,328 | -0,43 | -0,47 |
| ENSOCUG00000020976 | DRAP1    | -0,334 | -1,56 | -1,57 |
| ENSOCUG00000015632 | PDHB     | -0,336 | -0,25 | -0,72 |
| ENSOCUG00000004329 | PSMC5    | -0,344 | -0,57 | -0,63 |
| ENSOCUG00000009660 | OSBPL11  | -0,348 | -0,73 | -0,61 |
| ENSOCUG00000025649 | TPI1     | -0,350 | -0,24 | -0,70 |
| ENSOCUG00000029115 | CYTB     | -0,357 | -1,13 | -1,72 |
| ENSOCUG00000022350 | CLOCK    | -0,358 | -0,31 | -0,33 |
| ENSOCUG00000014344 | MPP7     | -0,362 | -0,50 | -0,82 |

|                    |           |        |       |       |
|--------------------|-----------|--------|-------|-------|
| ENSOCUG00000029101 | ATP8      | -0,365 | -0,98 | -1,41 |
| ENSOCUG00000015845 | RHOBTB3   | -0,367 | -0,28 | -0,32 |
| ENSOCUG00000009465 | AGL       | -0,383 | -0,28 | -0,58 |
| ENSOCUG00000016510 | RUVBL1    | -0,385 | -0,39 | -0,72 |
| ENSOCUG00000014610 | ABCC4     | -0,387 | -0,25 | -0,47 |
| ENSOCUG00000029113 | ND6       | -0,397 | -1,96 | -2,32 |
| ENSOCUG00000003263 | SLCO5A1   | -0,405 | -0,31 | -0,77 |
| ENSOCUG00000013647 | SORBS1    | -0,408 | -0,39 | -0,52 |
| ENSOCUG00000015590 | DLAT      | -0,411 | -0,37 | -0,70 |
| ENSOCUG00000001847 | TMBIM6    | -0,414 | -0,92 | -0,96 |
| ENSOCUG00000010895 | SVIL      | -0,418 | -0,61 | -0,70 |
| ENSOCUG00000006697 | HK1       | -0,423 | -0,62 | -0,73 |
| ENSOCUG00000013750 | WWTR1     | -0,427 | -0,64 | -0,25 |
| ENSOCUG00000012426 | PRKAR2A   | -0,430 | -0,25 | -0,52 |
| ENSOCUG00000015606 | DLST      | -0,433 | -0,33 | -0,67 |
| ENSOCUG00000014603 | FKBP4     | -0,439 | -0,69 | -0,77 |
| ENSOCUG00000006793 | LMO7      | -0,444 | -0,50 | -0,80 |
| ENSOCUG00000008971 | CPEB4     | -0,448 | -0,39 | -0,41 |
| ENSOCUG00000013561 | GFM1      | -0,449 | -0,51 | -0,71 |
| ENSOCUG00000003773 | DTNA      | -0,454 | -0,44 | -0,79 |
| ENSOCUG00000000245 | ABCF2     | -0,454 | -0,47 | -0,61 |
| ENSOCUG00000014175 | RAF1      | -0,460 | -0,35 | -0,35 |
| ENSOCUG00000000525 | TIMM23B   | -0,461 | -0,92 | -1,08 |
| ENSOCUG00000029096 | COX1      | -0,466 | -0,75 | -1,25 |
| ENSOCUG00000001697 | PTPRK     | -0,466 | -0,45 | -0,58 |
| ENSOCUG00000003236 | PPP1R12B  | -0,477 | -0,47 | -0,68 |
| ENSOCUG00000007880 | NIPSNAP3A | -0,479 | -0,63 | -0,82 |
| ENSOCUG00000003521 | ANK3      | -0,485 | -0,57 | -1,05 |
| ENSOCUG00000016777 | TTN       | -0,489 | -0,47 | -1,05 |
| ENSOCUG00000000928 | MFN1      | -0,489 | -0,26 | -0,34 |
| ENSOCUG00000005112 | FBXO32    | -0,490 | -0,39 | -0,46 |
| ENSOCUG00000009939 | MYPN      | -0,493 | -0,55 | -1,24 |
| ENSOCUG00000011228 | PDE4DIP   | -0,500 | -0,41 | -0,89 |
| ENSOCUG00000011508 | PDZD2     | -0,509 | -0,36 | -0,44 |
| ENSOCUG00000013549 | MLF1      | -0,510 | -1,05 | -1,64 |
| ENSOCUG00000016916 | CEP85     | -0,522 | -0,68 | -0,78 |
| ENSOCUG00000014032 | CHCHD3    | -0,522 | -0,71 | -1,10 |
| ENSOCUG00000000324 | PSTPIP2   | -0,540 | -0,40 | -0,51 |
| ENSOCUG00000014668 | PPARGC1A  | -0,545 | -0,77 | -1,21 |
| ENSOCUG00000016429 | ABT1      | -0,549 | -0,73 | -0,52 |
| ENSOCUG00000000477 | RALY      | -0,552 | -0,43 | -0,45 |
| ENSOCUG00000010297 | SIPA1L2   | -0,553 | -0,49 | -0,83 |

|                    |          |        |       |       |
|--------------------|----------|--------|-------|-------|
| ENSOCUG00000015112 | CLUH     | -0,557 | -0,53 | -0,62 |
| ENSOCUG00000006966 | ACADVL   | -0,573 | -0,66 | -0,72 |
| ENSOCUG00000016158 | PMVK     | -0,577 | -0,49 | -0,54 |
| ENSOCUG00000025023 | GAPDH    | -0,585 | -1,03 | -1,44 |
| ENSOCUG00000022357 | PDK2     | -0,596 | -0,87 | -0,86 |
| ENSOCUG00000013564 | TRIM63   | -0,599 | -0,97 | -1,32 |
| ENSOCUG00000009096 | LIAS     | -0,602 | -0,41 | -1,07 |
| ENSOCUG00000016643 | ITGB1BP2 | -0,605 | -0,40 | -1,04 |
| ENSOCUG00000010062 | DYSF     | -0,616 | -0,34 | -0,80 |
| ENSOCUG00000012333 | GOT1     | -0,622 | -0,56 | -1,07 |
| ENSOCUG00000002041 | UQCRC1   | -0,627 | -0,44 | -0,67 |
| ENSOCUG00000008004 | PDHX     | -0,657 | -0,47 | -0,64 |
| ENSOCUG00000011599 | CACNA1C  | -0,664 | -0,35 | -0,68 |
| ENSOCUG00000014122 | TPM1     | -0,665 | -0,66 | -1,21 |
| ENSOCUG00000011935 | PPTC7    | -0,672 | -0,73 | -0,82 |
| ENSOCUG00000009225 | MYOCD    | -0,677 | -0,90 | -1,09 |
| ENSOCUG00000011610 | VEGFA    | -0,679 | -0,81 | -0,74 |
| ENSOCUG00000014974 | COQ9     | -0,695 | -0,45 | -0,67 |
| ENSOCUG00000002272 | MYH7B    | -0,701 | -1,17 | -1,29 |
| ENSOCUG00000010393 | FXR2     | -0,734 | -0,52 | -0,55 |
| ENSOCUG00000006728 | MYOM3    | -0,751 | -0,81 | -1,24 |
| ENSOCUG00000012191 | KIAA1191 | -0,751 | -1,01 | -1,10 |
| ENSOCUG00000011879 | KLHL31   | -0,759 | -0,57 | -1,13 |
| ENSOCUG00000026781 | F5       | -0,764 | -0,85 | -1,02 |
| ENSOCUG00000014136 | ATP6V1F  | -0,767 | -0,69 | -1,03 |
| ENSOCUG00000022015 | LDHB     | -0,774 | -0,64 | -1,14 |
| ENSOCUG00000028008 | APOBEC2  | -0,804 | -0,61 | -1,03 |
| ENSOCUG00000002852 | EMC9     | -0,813 | -0,72 | -1,10 |
| ENSOCUG00000016944 | BVES     | -0,817 | -0,58 | -0,85 |
| ENSOCUG00000012286 | ASB14    | -0,837 | -1,53 | -2,04 |
| ENSOCUG00000014608 | FABP3    | -0,852 | -0,96 | -1,14 |
| ENSOCUG00000003829 | EZR      | -0,879 | -0,90 | -0,63 |
| ENSOCUG00000022337 | SOD2     | -0,898 | -1,03 | -1,39 |
| ENSOCUG00000010416 | KCNJ2    | -0,929 | -0,81 | -1,12 |
| ENSOCUG00000007837 | LRRC39   | -0,934 | -0,84 | -1,33 |
| ENSOCUG00000007967 | FHL2     | -0,936 | -0,87 | -1,29 |
| ENSOCUG00000011978 | FAM124B  | -1,004 | -0,71 | -0,92 |
| ENSOCUG00000026994 | TUBA4A   | -1,042 | -1,28 | -1,74 |
| ENSOCUG00000008337 | PCYOX1L  | -1,059 | -0,67 | -0,86 |
| ENSOCUG00000021380 | SMCO1    | -1,146 | -1,27 | -1,17 |
| ENSOCUG00000007214 | TMEM116  | -1,641 | -1,76 | -2,05 |
| ENSOCUG00000000145 | NFIL3    | -1,889 | -1,45 | -0,75 |

| ENSOCUG00000016839                 | CSRNP3   | -1,970    | -3,92           | -2,26 |
|------------------------------------|----------|-----------|-----------------|-------|
| ENSOCUG00000005940                 | ARNTL    | -2,482    | -2,54           | -1,35 |
| DEGs pergolide and dexfenfluramine |          | LogFC     |                 |       |
| ID                                 | GENE ID  | PERGOLIDE | DEXFENFLURAMINE |       |
| ENSOCUG00000007765                 | PSAT1    | 3,020     | 2,481           |       |
| ENSOCUG000000024190                | YWHAZ    | 2,772     | 2,671           |       |
| ENSOCUG00000000725                 | MC5R     | 2,474     | 2,178           |       |
| ENSOCUG00000018543                 | SNORA73B | 2,185     | 2,052           |       |
| ENSOCUG00000009058                 | HP       | 1,924     | 1,488           |       |
| ENSOCUG000000022125                | IL34     | 1,882     | 1,553           |       |
| ENSOCUG000000024096                | S100A6   | 1,881     | 1,827           |       |
| ENSOCUG000000023610                | CPNE5    | 1,866     | 1,939           |       |
| ENSOCUG00000016072                 | RPS7     | 1,824     | 1,871           |       |
| ENSOCUG00000015394                 | LRRC32   | 1,748     | 1,722           |       |
| ENSOCUG00000013134                 | ST8SIA1  | 1,707     | 1,485           |       |
| ENSOCUG00000005145                 | EEDP1    | 1,688     | 1,009           |       |
| ENSOCUG000000025329                | MARVELD1 | 1,658     | 1,880           |       |
| ENSOCUG000000006135                | FAU      | 1,647     | 1,591           |       |
| ENSOCUG000000024506                | PHKB     | 1,632     | 1,524           |       |
| ENSOCUG000000027232                | ATP8A2   | 1,600     | 1,333           |       |
| ENSOCUG000000027115                | TPRA1    | 1,572     | 1,567           |       |
| ENSOCUG000000020087                | SNORA76  | 1,515     | 1,403           |       |
| ENSOCUG000000027459                | RPS26    | 1,511     | 1,470           |       |
| ENSOCUG00000010496                 | OSGIN1   | 1,474     | 1,720           |       |
| ENSOCUG000000006890                | TMEM64   | 1,472     | 1,714           |       |
| ENSOCUG000000025006                | RPL9     | 1,436     | 1,467           |       |
| ENSOCUG000000005175                | QSOX1    | 1,413     | 1,747           |       |
| ENSOCUG00000018956                 | mir-29C  | 1,373     | 1,638           |       |
| ENSOCUG00000000983                 | PLSCR3   | 1,365     | 1,656           |       |
| ENSOCUG000000029359                | UBE2E3   | 1,364     | 1,486           |       |
| ENSOCUG000000029169                | ZFP36L2  | 1,359     | 1,500           |       |
| ENSOCUG000000027353                | SONRA62  | 1,357     | 1,559           |       |
| ENSOCUG000000004372                | Dgcr6    | 1,342     | 1,440           |       |
| ENSOCUG00000014962                 | RPL22L1  | 1,316     | 1,202           |       |
| ENSOCUG00000012615                 | BMPER    | 1,315     | 1,402           |       |
| ENSOCUG000000008644                | IRS3     | 1,310     | 1,278           |       |
| ENSOCUG00000019496                 | SNORA29  | 1,299     | 1,97            |       |
| ENSOCUG000000023567                | TOR1AIP2 | 1,276     | 0,956           |       |
| ENSOCUG000000004979                | KDEL3    | 1,273     | 1,332           |       |
| ENSOCUG000000002836                | PCK2     | 1,246     | 0,884           |       |
| ENSOCUG00000012631                 | PPIA     | 1,235     | 1,128           |       |
| ENSOCUG00000014661                 | NAAA     | 1,234     | 1,465           |       |
| ENSOCUG00000013567                 | GRN      | 1,234     | 1,209           |       |
| ENSOCUG00000004795                 | UFM1     | 1,228     | 1,103           |       |

|                    |                  |       |       |
|--------------------|------------------|-------|-------|
| ENSOCUG00000022712 | PIK3R5           | 1,228 | 1,550 |
| ENSOCUG00000026029 | SERPINH1         | 1,226 | 1,220 |
| ENSOCUG00000006229 | TYRO3            | 1,224 | 1,279 |
| ENSOCUG00000014420 | CD53             | 1,221 | 1,207 |
| ENSOCUG00000006801 | MCM10            | 1,219 | 1,090 |
| ENSOCUG00000004138 | SERINC5          | 1,217 | 1,104 |
| ENSOCUG00000010950 | TMED7            | 1,215 | 1,112 |
| ENSOCUG00000002902 | DUSP6            | 1,214 | 0,630 |
| ENSOCUG00000014907 | WIF1             | 1,211 | 1,131 |
| ENSOCUG00000007508 | NID1             | 1,206 | 0,824 |
| ENSOCUG00000024510 | ARL5A            | 1,194 | 0,899 |
| ENSOCUG00000006887 | CYP8B1           | 1,186 | 1,074 |
| ENSOCUG00000010549 | MMD              | 1,174 | 0,796 |
| ENSOCUG00000003250 | NDN              | 1,155 | 1,423 |
| ENSOCUG00000004167 | UROD             | 1,152 | 0,924 |
| ENSOCUG00000015952 | TIMP4            | 1,151 | 0,906 |
| ENSOCUG00000007606 | MAP2K6           | 1,142 | 0,973 |
| ENSOCUG00000012562 | WDPCP            | 1,135 | 1,242 |
| ENSOCUG00000005946 | SLC44A1          | 1,117 | 1,012 |
| ENSOCUG00000000427 | PM20D1           | 1,114 | 1,005 |
| ENSOCUG00000014225 | SLCO2B1          | 1,113 | 1,440 |
| ENSOCUG00000009424 | LAMA1            | 1,102 | 0,724 |
| ENSOCUG00000008234 | ZADH2            | 1,100 | 0,774 |
| ENSOCUG00000017509 | SERPINI1         | 1,099 | 1,215 |
| ENSOCUG00000015433 | ZKSCAN1          | 1,091 | 1,430 |
| ENSOCUG00000004954 | AMACR            | 1,087 | 0,695 |
| ENSOCUG00000014239 | TMEM56-<br>RWDD3 | 1,085 | 1,184 |
| ENSOCUG00000014730 | FZD2             | 1,079 | 1,280 |
| ENSOCUG00000022366 | snoU85           | 1,078 | 1,283 |
| ENSOCUG00000027359 | TSPAN11          | 1,076 | 0,945 |
| ENSOCUG00000009326 | TMEM167A         | 1,075 | 1,205 |
| ENSOCUG00000029357 | RPL34            | 1,068 | 0,991 |
| ENSOCUG00000013610 | ASB3             | 1,055 | 0,964 |
| ENSOCUG00000005900 | FBLN2            | 1,054 | 0,805 |
| ENSOCUG00000013017 | ELOVL2           | 1,050 | 1,119 |
| ENSOCUG00000010292 | EFHC2            | 1,049 | 1,064 |
| ENSOCUG00000012881 | COL1A1           | 1,046 | 1,154 |
| ENSOCUG00000025474 | RPLP0            | 1,041 | 1,065 |
| ENSOCUG00000006055 | RNF13            | 1,040 | 0,824 |
| ENSOCUG00000001726 | WNT11            | 1,029 | 0,976 |
| ENSOCUG00000013931 | LEPROTL1         | 1,027 | 1,352 |
| ENSOCUG00000011735 | C1QTNF2          | 1,022 | 1,008 |
| ENSOCUG00000018960 | SNORA3A          | 1,014 | 0,938 |
| ENSOCUG00000014988 | COL3A1           | 1,013 | 0,951 |



|                    |           |       |       |
|--------------------|-----------|-------|-------|
| ENSOCUG00000013992 | TSPAN15   | 1,009 | 1,007 |
| ENSOCUG00000023265 | SNORD2    | 1,003 | 0,872 |
| ENSOCUG00000015863 | C5orf63   | 1,000 | 1,080 |
| ENSOCUG00000027003 | Hist1h2bo | 0,994 | 1,047 |
| ENSOCUG00000014194 | NDUFA4    | 0,990 | 0,700 |
| ENSOCUG00000024792 | HDAC7     | 0,987 | 0,933 |
| ENSOCUG00000024365 | ARF5      | 0,986 | 1,162 |
| ENSOCUG00000023327 | RPL39     | 0,984 | 1,046 |
| ENSOCUG00000003059 | CTBS      | 0,977 | 0,692 |
| ENSOCUG00000012637 | EPHB3     | 0,977 | 1,017 |
| ENSOCUG00000005504 | POLR1C    | 0,974 | 0,984 |
| ENSOCUG00000016685 | NOX4      | 0,973 | 0,742 |
| ENSOCUG00000001802 | COPZ2     | 0,973 | 0,637 |
| ENSOCUG00000014315 | MCTS1     | 0,964 | 0,747 |
| ENSOCUG00000007808 | CAVIN3    | 0,962 | 0,987 |
| ENSOCUG00000024110 | PALD1     | 0,953 | 0,699 |
| ENSOCUG00000028053 | ASPN      | 0,952 | 0,702 |
| ENSOCUG00000007418 | PDK3      | 0,952 | 0,920 |
| ENSOCUG00000025470 | XBP1      | 0,947 | 1,028 |
| ENSOCUG00000024298 | NINJ1     | 0,947 | 1,298 |
| ENSOCUG00000026159 | KIAA1755  | 0,943 | 1,124 |
| ENSOCUG00000008227 | MOB1A     | 0,942 | 0,708 |
| ENSOCUG00000024954 | LAMP2     | 0,942 | 0,936 |
| ENSOCUG00000007039 | C4A       | 0,942 | 1,232 |
| ENSOCUG00000023076 | SFT2D2    | 0,938 | 0,958 |
| ENSOCUG00000000754 | CYP39A1   | 0,937 | 1,048 |
| ENSOCUG00000029701 | TMEM120B  | 0,936 | 1,162 |
| ENSOCUG00000011161 | LRRC17    | 0,931 | 0,981 |
| ENSOCUG00000010588 | EIF6      | 0,928 | 0,976 |
| ENSOCUG00000008914 | AHDC1     | 0,924 | 0,879 |
| ENSOCUG00000004456 | MAGED2    | 0,922 | 0,829 |
| ENSOCUG00000005086 | PSMG2     | 0,922 | 0,723 |
| ENSOCUG00000016704 | GXYLT2    | 0,922 | 1,087 |
| ENSOCUG00000021605 | ARAP1     | 0,914 | 0,935 |
| ENSOCUG00000009771 | C1D       | 0,914 | 0,665 |
| ENSOCUG00000005147 | TMEM161B  | 0,914 | 0,876 |
| ENSOCUG00000007824 | G2E3      | 0,910 | 0,753 |
| ENSOCUG00000006315 | RFFL      | 0,906 | 0,891 |
| ENSOCUG00000000092 | SERPINF1  | 0,905 | 0,601 |
| ENSOCUG00000014407 | NUP35     | 0,903 | 0,659 |
| ENSOCUG00000002919 | TINF2     | 0,903 | 0,876 |
| ENSOCUG00000002375 | VAMP8     | 0,902 | 0,959 |
| ENSOCUG00000025005 | ARSI      | 0,900 | 0,741 |
| ENSOCUG00000000440 | CYP7B1    | 0,899 | 0,828 |
| ENSOCUG00000002874 | PTK7      | 0,899 | 1,187 |

|                    |          |       |       |
|--------------------|----------|-------|-------|
| ENSOCUG00000010233 | HNRNPLL  | 0,890 | 0,791 |
| ENSOCUG00000012681 | TP53I13  | 0,890 | 0,915 |
| ENSOCUG00000003680 | GSTA4    | 0,885 | 1,027 |
| ENSOCUG00000026403 | RAB32    | 0,884 | 0,729 |
| ENSOCUG00000024314 | CDC42SE1 | 0,884 | 0,662 |
| ENSOCUG00000010690 | FAM126B  | 0,880 | 0,814 |
| ENSOCUG00000014740 | SLC37A2  | 0,880 | 0,931 |
| ENSOCUG00000001888 | H2AFZ    | 0,878 | 0,753 |
| ENSOCUG00000005740 | ARL6IP1  | 0,870 | 0,934 |
| ENSOCUG00000017494 | MRC2     | 0,869 | 1,132 |
| ENSOCUG00000004359 | SERPINE2 | 0,863 | 0,933 |
| ENSOCUG00000004889 | VPS18    | 0,858 | 0,894 |
| ENSOCUG00000029427 | MANEA    | 0,858 | 0,639 |
| ENSOCUG00000010517 | SLC30A7  | 0,857 | 0,873 |
| ENSOCUG00000009050 | RELN     | 0,857 | 0,727 |
| ENSOCUG00000021304 | MYL12B   | 0,855 | 0,518 |
| ENSOCUG00000002466 | STAT4    | 0,854 | 0,865 |
| ENSOCUG00000012561 | SLC43A3  | 0,853 | 0,891 |
| ENSOCUG00000012397 | TSC22D3  | 0,847 | 0,964 |
| ENSOCUG00000001317 | DPY19L4  | 0,847 | 0,920 |
| ENSOCUG00000014385 | CPQ      | 0,843 | 0,821 |
| ENSOCUG00000012985 | TMEM181  | 0,842 | 1,211 |
| ENSOCUG00000011774 | FBXL5    | 0,841 | 0,786 |
| ENSOCUG00000007773 | IFT20    | 0,839 | 0,616 |
| ENSOCUG00000008584 | ERI3     | 0,838 | 0,821 |
| ENSOCUG00000011908 | ARPC3    | 0,838 | 0,656 |
| ENSOCUG00000017711 | LANCL1   | 0,838 | 0,663 |
| ENSOCUG00000003358 | ACTR10   | 0,833 | 0,781 |
| ENSOCUG00000016243 | MT3      | 0,832 | 0,808 |
| ENSOCUG00000005689 | MAP3K12  | 0,828 | 0,892 |
| ENSOCUG00000000581 | NAGLU    | 0,827 | 1,150 |
| ENSOCUG00000011860 | APAF1    | 0,826 | 0,820 |
| ENSOCUG00000003152 | SCAP     | 0,824 | 1,062 |
| ENSOCUG00000026081 | NIT2     | 0,824 | 0,640 |
| ENSOCUG00000027290 | PTCD3    | 0,824 | 0,44  |
| ENSOCUG00000005019 | CAND1    | 0,824 | 0,806 |
| ENSOCUG00000011284 | SLC7A2   | 0,819 | 0,674 |
| ENSOCUG00000000721 | PAMR1    | 0,817 | 0,802 |
| ENSOCUG00000004060 | AP2B1    | 0,815 | 0,746 |
| ENSOCUG00000013715 | C5orf34  | 0,815 | 0,768 |
| ENSOCUG00000019650 | SNORA42  | 0,809 | 2,44  |
| ENSOCUG00000027106 | HAS2     | 0,808 | 0,777 |
| ENSOCUG00000008470 | DCTN5    | 0,807 | 0,847 |
| ENSOCUG00000011789 | ARMC2    | 0,807 | 0,930 |
| ENSOCUG00000017029 | BET1     | 0,802 | 0,889 |

|                    |          |       |       |
|--------------------|----------|-------|-------|
| ENSOCUG00000004831 | DIP2A    | 0,799 | 0,786 |
| ENSOCUG00000008044 | DCAF12   | 0,798 | 0,705 |
| ENSOCUG00000006353 | KBTBD4   | 0,797 | 0,756 |
| ENSOCUG00000007801 | WDR77    | 0,797 | 0,730 |
| ENSOCUG00000005571 | CA5B     | 0,797 | 0,727 |
| ENSOCUG00000016783 | DTWD1    | 0,797 | 0,613 |
| ENSOCUG00000006445 | FZD4     | 0,796 | 0,522 |
| ENSOCUG00000017049 | FAM118B  | 0,794 | 0,817 |
| ENSOCUG00000010547 | HLF      | 0,794 | 0,826 |
| ENSOCUG00000005647 | RP2      | 0,789 | 0,904 |
| ENSOCUG00000009190 | HEXA     | 0,787 | 1,008 |
| ENSOCUG00000027478 | SGIP1    | 0,787 | 0,738 |
| ENSOCUG00000007892 | FBXL4    | 0,785 | 0,857 |
| ENSOCUG00000014366 | UGCG     | 0,785 | 0,674 |
| ENSOCUG00000009140 | RPS2     | 0,785 | 0,711 |
| ENSOCUG00000004396 | NQO1     | 0,783 | 0,505 |
| ENSOCUG00000026678 | SP3      | 0,783 | 0,675 |
| ENSOCUG00000013648 | SLC16A9  | 0,781 | 0,961 |
| ENSOCUG00000012539 | TMEM19   | 0,780 | 0,770 |
| ENSOCUG00000004336 | FAR1     | 0,778 | 0,640 |
| ENSOCUG00000004786 | PRDX4    | 0,777 | 0,932 |
| ENSOCUG00000001072 | BCO1     | 0,777 | 0,743 |
| ENSOCUG00000006473 | ATP6V1A  | 0,776 | 0,484 |
| ENSOCUG00000007898 | SSR3     | 0,776 | 0,811 |
| ENSOCUG00000005945 | AKR1A1   | 0,771 | 0,785 |
| ENSOCUG00000023883 | VAMP3    | 0,770 | 0,726 |
| ENSOCUG00000002368 | GGCX     | 0,770 | 0,887 |
| ENSOCUG00000014665 | REPS2    | 0,770 | 0,764 |
| ENSOCUG00000013866 | SELT     | 0,769 | 0,895 |
| ENSOCUG00000006005 | PIGC     | 0,764 | 0,707 |
| ENSOCUG00000009242 | C5orf51  | 0,762 | 0,800 |
| ENSOCUG00000024967 | ID1      | 0,761 | 0,704 |
| ENSOCUG00000000532 | WLS      | 0,758 | 0,951 |
| ENSOCUG00000006953 | SLC29A3  | 0,757 | 0,687 |
| ENSOCUG00000026130 | GSTZ1    | 0,755 | 0,591 |
| ENSOCUG00000006994 | F11R     | 0,747 | 0,877 |
| ENSOCUG00000001432 | RARG     | 0,745 | 0,908 |
| ENSOCUG00000002025 | UBAC2    | 0,743 | 0,700 |
| ENSOCUG00000004921 | DCLRE1A  | 0,743 | 0,744 |
| ENSOCUG00000013894 | DERA     | 0,741 | 0,556 |
| ENSOCUG00000001265 | DCK      | 0,740 | 0,634 |
| ENSOCUG00000006943 | UNC5B    | 0,739 | 0,679 |
| ENSOCUG00000012160 | PRRC1    | 0,737 | 0,878 |
| ENSOCUG00000026379 | TRMT12   | 0,737 | 1,102 |
| ENSOCUG00000016897 | SLC22A17 | 0,736 | 0,600 |

|                      |          |       |       |
|----------------------|----------|-------|-------|
| ENSOCUG00000003662   | PLXNA1   | 0,734 | 0,787 |
| ENSOCUG00000001725   | PDGFRB   | 0,731 | 0,765 |
| ENSOCUG00000001732   | TMEM184C | 0,731 | 0,725 |
| ENSOCUG00000000727   | NECTIN3  | 0,730 | 0,542 |
| ENSOCUG000000010476  | FANCC    | 0,727 | 0,660 |
| ENSOCUG00000002026   | TBX18    | 0,726 | 0,750 |
| ENSOCUG00000004042   | PTPRF    | 0,725 | 0,881 |
| ENSOCUG000000015482  | TMEM241  | 0,723 | 0,696 |
| ENSOCUG000000010360  | HSPE1    | 0,722 | 0,477 |
| ENSOCUG000000003401  | SLC35B3  | 0,721 | 0,802 |
| ENSOCUG000000006777  | FAM102B  | 0,720 | 0,678 |
| ENSOCUG000000024551  | ATRAID   | 0,720 | 0,721 |
| ENSOCUG000000001288  | UBB      | 0,718 | 0,498 |
| ENSOCUG000000008275  | ANO10    | 0,718 | 0,601 |
| ENSOCUG000000001517  | BTF3L4   | 0,716 | 0,635 |
| ENSOCUG0000000012411 | UHMK1    | 0,715 | 0,611 |
| ENSOCUG0000000016487 | DDR1     | 0,714 | 0,921 |
| ENSOCUG000000002011  | EXTL2    | 0,711 | 0,798 |
| ENSOCUG000000009444  | ALDH1A1  | 0,711 | 0,640 |
| ENSOCUG000000009838  | FIGN     | 0,711 | 0,583 |
| ENSOCUG000000006606  | DCHS1    | 0,706 | 0,890 |
| ENSOCUG000000011779  | TNFRSF19 | 0,706 | 0,655 |
| ENSOCUG000000028026  | STAB1    | 0,706 | 0,830 |
| ENSOCUG000000004299  | SLF1     | 0,704 | 0,552 |
| ENSOCUG000000017709  | TRPC1    | 0,704 | 0,641 |
| ENSOCUG000000010376  | MGST3    | 0,701 | 0,539 |
| ENSOCUG000000003860  | PEX6     | 0,699 | 0,491 |
| ENSOCUG000000013813  | IL33     | 0,697 | 0,669 |
| ENSOCUG000000005958  | ATRNL1   | 0,697 | 0,635 |
| ENSOCUG000000008364  | PTPN4    | 0,696 | 0,638 |
| ENSOCUG000000001979  | SRR      | 0,694 | 0,630 |
| ENSOCUG000000006453  | NPR2     | 0,694 | 0,674 |
| ENSOCUG000000004667  | FUT8     | 0,693 | 0,464 |
| ENSOCUG000000024309  | SMAD7    | 0,691 | 0,935 |
| ENSOCUG000000012416  | STON2    | 0,691 | 0,547 |
| ENSOCUG000000012682  | CCNI     | 0,690 | 0,849 |
| ENSOCUG000000002653  | PIGO     | 0,689 | 0,692 |
| ENSOCUG000000009000  | RNF145   | 0,685 | 0,688 |
| ENSOCUG000000008610  | DPYD     | 0,681 | 0,610 |
| ENSOCUG000000016989  | CAD      | 0,680 | 0,589 |
| ENSOCUG000000007056  | TNXB     | 0,680 | 0,895 |
| ENSOCUG000000014453  | ACACA    | 0,679 | 0,499 |
| ENSOCUG000000009849  | GLT8D1   | 0,675 | 0,704 |
| ENSOCUG000000001859  | NUDT7    | 0,674 | 0,598 |
| ENSOCUG000000014492  | IRAK3    | 0,674 | 0,786 |

|                    |           |       |       |
|--------------------|-----------|-------|-------|
| ENSOCUG00000005174 | DPT       | 0,673 | 0,506 |
| ENSOCUG00000000653 | NDRG2     | 0,673 | 0,587 |
| ENSOCUG00000000673 | GEMIN2    | 0,673 | 0,586 |
| ENSOCUG00000000696 | SMTNL2    | 0,672 | 0,912 |
| ENSOCUG00000004776 | SERAC1    | 0,670 | 0,527 |
| ENSOCUG00000006591 | SCOC      | 0,670 | 0,803 |
| ENSOCUG00000000791 | RPL24     | 0,668 | 0,689 |
| ENSOCUG00000012930 | PPP2R1B   | 0,668 | 0,436 |
| ENSOCUG00000014480 | C1R       | 0,667 | 0,658 |
| ENSOCUG00000003866 | FBN1      | 0,666 | 0,709 |
| ENSOCUG00000023727 | LCAT      | 0,666 | 0,828 |
| ENSOCUG00000022296 | TAGLN2    | 0,665 | 0,987 |
| ENSOCUG00000016501 | SEC61A1   | 0,664 | 0,726 |
| ENSOCUG00000003519 | ARHGAP44  | 0,663 | 0,529 |
| ENSOCUG00000016477 | SELP      | 0,663 | 0,469 |
| ENSOCUG00000005680 | AMD1      | 0,663 | 0,638 |
| ENSOCUG00000002828 | IGFBP4    | 0,662 | 0,761 |
| ENSOCUG00000015793 | SERINC1   | 0,662 | 0,699 |
| ENSOCUG00000007417 | SGPP1     | 0,660 | 0,665 |
| ENSOCUG00000007460 | SOD3      | 0,659 | 0,921 |
| ENSOCUG00000016292 | TGFBR1    | 0,658 | 0,496 |
| ENSOCUG00000006156 | WDPCP     | 0,657 | 0,994 |
| ENSOCUG00000011204 | TIA1      | 0,654 | 0,620 |
| ENSOCUG00000016600 | GABARAPL2 | 0,654 | 0,440 |
| ENSOCUG00000002519 | ARMT1     | 0,653 | 0,679 |
| ENSOCUG00000000127 | GALNT1    | 0,652 | 0,509 |
| ENSOCUG00000008261 | NXT2      | 0,652 | 0,974 |
| ENSOCUG00000005956 | ALDH18A1  | 0,652 | 0,668 |
| ENSOCUG00000006968 | NEU1      | 0,651 | 0,575 |
| ENSOCUG00000012575 | PTAR1     | 0,649 | 0,599 |
| ENSOCUG00000006658 | BORA      | 0,649 | 0,860 |
| ENSOCUG00000003220 | GPR34     | 0,644 | 0,813 |
| ENSOCUG00000009598 | LTBP1     | 0,643 | 0,670 |
| ENSOCUG00000016796 | SPINT2    | 0,641 | 0,806 |
| ENSOCUG00000004001 | CNDP2     | 0,641 | 0,644 |
| ENSOCUG00000003378 | UNC50     | 0,640 | 0,454 |
| ENSOCUG00000002137 | UGP2      | 0,640 | 0,383 |
| ENSOCUG00000014920 | SPRY1     | 0,638 | 0,678 |
| ENSOCUG00000014237 | GK5       | 0,638 | 0,463 |
| ENSOCUG00000000764 | CMTM6     | 0,635 | 0,763 |
| ENSOCUG00000021230 | RNFT1     | 0,634 | 0,646 |
| ENSOCUG00000002295 | Naca      | 0,632 | 0,562 |
| ENSOCUG00000008797 | GOLT1B    | 0,631 | 0,604 |
| ENSOCUG00000000867 | MRPS28    | 0,631 | 0,452 |
| ENSOCUG00000004334 | TMEM255A  | 0,631 | 0,801 |

|                    |          |       |       |
|--------------------|----------|-------|-------|
| ENSOCUG00000013232 | COL4A1   | 0,631 | 0,417 |
| ENSOCUG00000010431 | RAB3GAP2 | 0,629 | 0,559 |
| ENSOCUG00000005251 | INSIG2   | 0,627 | 0,637 |
| ENSOCUG00000009775 | TEX14    | 0,626 | 0,615 |
| ENSOCUG00000000392 | ARMC1    | 0,626 | 0,677 |
| ENSOCUG00000026336 | RSPS19   | 0,624 | 0,624 |
| ENSOCUG00000015874 | DCAF7    | 0,622 | 0,690 |
| ENSOCUG00000004627 | APH1B    | 0,621 | 0,887 |
| ENSOCUG00000005964 | TCTN3    | 0,621 | 0,546 |
| ENSOCUG00000008204 | SOAT1    | 0,620 | 0,589 |
| ENSOCUG00000010317 | MANF     | 0,619 | 0,365 |
| ENSOCUG00000003766 | DPYSL3   | 0,618 | 0,679 |
| ENSOCUG00000011850 | ATP6V0D1 | 0,615 | 0,540 |
| ENSOCUG00000026333 | PER1     | 0,615 | 0,941 |
| ENSOCUG00000012845 | SERTAD4  | 0,614 | 0,656 |
| ENSOCUG00000021770 | MFF      | 0,611 | 1,052 |
| ENSOCUG00000015135 | WDSUB1   | 0,611 | 0,871 |
| ENSOCUG00000007893 | GPAM     | 0,611 | 0,548 |
| ENSOCUG00000017936 | SLC39A10 | 0,611 | 0,697 |
| ENSOCUG00000007070 | ADAM15   | 0,610 | 0,612 |
| ENSOCUG00000004199 | CYP2J2   | 0,608 | 0,411 |
| ENSOCUG00000007069 | FGFR2    | 0,608 | 0,510 |
| ENSOCUG00000003979 | MANSC1   | 0,608 | 0,644 |
| ENSOCUG00000000272 | EMC1     | 0,607 | 0,696 |
| ENSOCUG00000006668 | KLHL15   | 0,599 | 0,569 |
| ENSOCUG00000015427 | DBF4     | 0,599 | 0,684 |
| ENSOCUG00000000200 | RAP1GAP2 | 0,598 | 0,498 |
| ENSOCUG00000000857 | FUT10    | 0,598 | 0,651 |
| ENSOCUG00000002494 | FBXO33   | 0,598 | 0,714 |
| ENSOCUG00000029252 | HFM1     | 0,596 | 0,563 |
| ENSOCUG00000010086 | ENO1     | 0,596 | 0,548 |
| ENSOCUG00000026120 | FOLH1    | 0,595 | 0,371 |
| ENSOCUG00000013088 | HAUS4    | 0,594 | 0,600 |
| ENSOCUG00000012407 | MID2     | 0,593 | 0,581 |
| ENSOCUG00000010647 | BZW1     | 0,593 | 0,576 |
| ENSOCUG00000026383 | Akr1b10  | 0,593 | 0,707 |
| ENSOCUG00000013895 | RAB5B    | 0,592 | 0,424 |
| ENSOCUG00000006345 | GNS      | 0,591 | 0,578 |
| ENSOCUG00000010978 | SHPRH    | 0,588 | 0,642 |
| ENSOCUG00000000518 | UHRF2    | 0,587 | 0,609 |
| ENSOCUG00000006010 | ARHGDIB  | 0,587 | 0,840 |
| ENSOCUG00000011056 | OSTC     | 0,585 | 0,567 |
| ENSOCUG00000002150 | RPS16    | 0,585 | 0,531 |
| ENSOCUG00000001908 | ATG7     | 0,585 | 0,566 |
| ENSOCUG00000015882 | EPDR1    | 0,583 | 0,583 |

|                    |          |       |       |
|--------------------|----------|-------|-------|
| ENSOCUG00000010695 | BABAM2   | 0,582 | 0,481 |
| ENSOCUG00000008124 | MMADHC   | 0,581 | 0,397 |
| ENSOCUG00000000049 | MASP1    | 0,580 | 0,673 |
| ENSOCUG00000000010 | GNE      | 0,578 | 0,693 |
| ENSOCUG00000025830 | CAPN5    | 0,576 | 0,868 |
| ENSOCUG00000005431 | METTL21A | 0,575 | 0,869 |
| ENSOCUG00000002722 | ANAPC5   | 0,574 | 0,669 |
| ENSOCUG00000015851 | DYM      | 0,573 | 0,293 |
| ENSOCUG00000017670 | PTBP3    | 0,573 | 0,711 |
| ENSOCUG00000011941 | HVCN1    | 0,572 | 0,699 |
| ENSOCUG00000005642 | MTPN     | 0,571 | 0,707 |
| ENSOCUG00000003129 | WDR36    | 0,568 | 0,650 |
| ENSOCUG00000006444 | CD109    | 0,568 | 0,604 |
| ENSOCUG00000009946 | AP3M1    | 0,568 | 0,662 |
| ENSOCUG00000004928 | TGFBI    | 0,567 | 0,880 |
| ENSOCUG00000011317 | GALNT11  | 0,565 | 0,526 |
| ENSOCUG00000001412 | IGFBP6   | 0,565 | 0,555 |
| ENSOCUG00000006650 | ETF1     | 0,565 | 0,445 |
| ENSOCUG00000016994 | TXNDC11  | 0,564 | 0,557 |
| ENSOCUG00000002657 | GNB2     | 0,563 | 0,936 |
| ENSOCUG00000007990 | OSBPL3   | 0,561 | 0,542 |
| ENSOCUG00000010481 | EGFR     | 0,561 | 0,424 |
| ENSOCUG00000000203 | MAGT1    | 0,560 | 0,592 |
| ENSOCUG00000005265 | NRIP1    | 0,560 | 0,259 |
| ENSOCUG00000001887 | TMEM245  | 0,559 | 0,535 |
| ENSOCUG00000016565 | NOTCH2   | 0,559 | 0,638 |
| ENSOCUG00000017726 | ITGA11   | 0,559 | 0,507 |
| ENSOCUG00000016730 | CXorf56  | 0,557 | 0,555 |
| ENSOCUG00000007776 | MMS19    | 0,555 | 0,600 |
| ENSOCUG00000010620 | TTC21B   | 0,555 | 0,547 |
| ENSOCUG00000003027 | TBRG1    | 0,550 | 0,636 |
| ENSOCUG00000004616 | MTMR11   | 0,550 | 0,873 |
| ENSOCUG00000008635 | MAN1C1   | 0,549 | 0,711 |
| ENSOCUG00000003414 | IFT88    | 0,549 | 0,675 |
| ENSOCUG00000004862 | IPO11    | 0,546 | 0,535 |
| ENSOCUG00000009483 | TMEM39A  | 0,545 | 0,749 |
| ENSOCUG00000016001 | PPA1     | 0,545 | 0,410 |
| ENSOCUG00000007237 | HSD17B11 | 0,545 | 0,570 |
| ENSOCUG00000021110 | UBE3D    | 0,543 | 0,604 |
| ENSOCUG00000014137 | NAALAD2  | 0,543 | 0,665 |
| ENSOCUG00000013901 | IMPACT   | 0,543 | 0,449 |
| ENSOCUG00000022399 | RPL13    | 0,542 | 0,29  |
| ENSOCUG00000003181 | ZYG11B   | 0,542 | 0,286 |
| ENSOCUG00000012915 | SIK2     | 0,542 | 0,408 |
| ENSOCUG00000013276 | COL4A2   | 0,541 | 0,645 |

|                    |            |       |       |
|--------------------|------------|-------|-------|
| ENSOCUG00000016056 | SGSM2      | 0,541 | 0,426 |
| ENSOCUG00000014780 | KLHL7      | 0,540 | 0,707 |
| ENSOCUG00000001343 | IQSEC1     | 0,539 | 0,665 |
| ENSOCUG00000000608 | PTGFRN     | 0,538 | 0,617 |
| ENSOCUG00000001256 | GANAB      | 0,537 | 0,511 |
| ENSOCUG00000015979 | DPY19L1    | 0,537 | 0,582 |
| ENSOCUG00000013769 | SH3PXD2A   | 0,536 | 0,569 |
| ENSOCUG00000007582 | RNF11      | 0,534 | 0,573 |
| ENSOCUG00000003348 | ATP5S      | 0,533 | 0,379 |
| ENSOCUG00000006502 | SEPT10     | 0,533 | 0,418 |
| ENSOCUG00000011201 | CYP4B1     | 0,531 | 0,730 |
| ENSOCUG00000004990 | APEH       | 0,529 | 0,594 |
| ENSOCUG00000000763 | PLA2G7     | 0,528 | 0,561 |
| ENSOCUG00000015052 | XRCC4      | 0,528 | 0,560 |
| ENSOCUG00000001874 | ATR        | 0,528 | 0,482 |
| ENSOCUG00000009419 | APPBP2     | 0,528 | 0,555 |
| ENSOCUG00000013811 | SCYL3      | 0,526 | 0,494 |
| ENSOCUG00000004731 | RBM14-RBM4 | 0,526 | 0,681 |
| ENSOCUG00000005295 | GARS       | 0,525 | 0,476 |
| ENSOCUG00000004258 | METAP1     | 0,525 | 0,638 |
| ENSOCUG00000007519 | CDK7       | 0,524 | 0,471 |
| ENSOCUG00000010801 | PPEF1      | 0,523 | 0,709 |
| ENSOCUG00000008426 | GGA2       | 0,522 | 0,511 |
| ENSOCUG00000014143 | INTS6L     | 0,522 | 0,649 |
| ENSOCUG00000002102 | GTDC1      | 0,522 | 0,467 |
| ENSOCUG00000009165 | TTI1       | 0,521 | 0,611 |
| ENSOCUG00000014174 | ZNF395     | 0,521 | 0,743 |
| ENSOCUG00000003711 | ELF2       | 0,521 | 0,435 |
| ENSOCUG00000000729 | TM9SF2     | 0,519 | 0,546 |
| ENSOCUG00000017117 | B2M        | 0,519 | 0,854 |
| ENSOCUG00000005737 | LGMN       | 0,519 | 0,761 |
| ENSOCUG00000010408 | BPNT1      | 0,519 | 0,421 |
| ENSOCUG00000009711 | CRIPT      | 0,519 | 0,762 |
| ENSOCUG00000006802 | LCORL      | 0,517 | 0,363 |
| ENSOCUG00000001817 | MED23      | 0,517 | 0,537 |
| ENSOCUG00000014086 | RFX3       | 0,516 | 0,673 |
| ENSOCUG00000004643 | WSB1       | 0,516 | 0,701 |
| ENSOCUG00000024465 | COL8A1     | 0,516 | 0,497 |
| ENSOCUG00000025433 | CRY2       | 0,515 | 0,552 |
| ENSOCUG00000003369 | APOOL      | 0,515 | 0,440 |
| ENSOCUG00000006408 | DISP1      | 0,514 | 0,595 |
| ENSOCUG00000016154 | KCTD20     | 0,514 | 0,531 |
| ENSOCUG00000001232 | RPL35A     | 0,514 | 0,674 |
| ENSOCUG00000007901 | SEMA6D     | 0,514 | 0,737 |
| ENSOCUG00000028126 | YIPF5      | 0,512 | 0,598 |



|                    |          |       |       |
|--------------------|----------|-------|-------|
| ENSOCUG00000005908 | SLC35A5  | 0,512 | 0,567 |
| ENSOCUG00000010732 | CYFIP1   | 0,512 | 0,602 |
| ENSOCUG00000013126 | TRPC4AP  | 0,511 | 0,610 |
| ENSOCUG00000010700 | URB2     | 0,511 | 0,476 |
| ENSOCUG00000008774 | PTEN     | 0,509 | 0,540 |
| ENSOCUG00000008481 | EEF1A1   | 0,507 | 0,587 |
| ENSOCUG00000016126 | PRMT2    | 0,506 | 0,575 |
| ENSOCUG00000013167 | SLC9A6   | 0,506 | 0,441 |
| ENSOCUG00000015255 | EIF5A    | 0,505 | 0,464 |
| ENSOCUG00000010375 | EIF4A1   | 0,504 | 0,428 |
| ENSOCUG00000004153 | ICE2     | 0,504 | 0,388 |
| ENSOCUG00000008734 | TRAM1    | 0,503 | 0,596 |
| ENSOCUG00000004107 | ST3GAL2  | 0,503 | 0,839 |
| ENSOCUG00000026606 | SCARNA2  | 0,503 | 0,421 |
| ENSOCUG00000010371 | FRZB     | 0,502 | 0,587 |
| ENSOCUG00000005491 | CDKN2AIP | 0,502 | 0,745 |
| ENSOCUG00000012254 | SNAI2    | 0,501 | 0,673 |
| ENSOCUG00000007580 | RAB30    | 0,501 | 0,515 |
| ENSOCUG00000009234 | USP45    | 0,500 | 0,479 |
| ENSOCUG00000015652 | RECK     | 0,500 | 0,477 |
| ENSOCUG00000007206 | ANKRD52  | 0,499 | 0,926 |
| ENSOCUG00000000432 | COPB1    | 0,499 | 0,528 |
| ENSOCUG00000014515 | CAV2     | 0,499 | 0,253 |
| ENSOCUG00000016221 | GALNT12  | 0,499 | 0,691 |
| ENSOCUG00000013022 | RNASE4   | 0,498 | 0,536 |
| ENSOCUG00000009925 | SEC23A   | 0,498 | 0,408 |
| ENSOCUG00000007907 | OCIAD2   | 0,498 | 0,424 |
| ENSOCUG00000017254 | BBS2     | 0,498 | 0,462 |
| ENSOCUG00000000231 | AASDHPPT | 0,497 | 0,438 |
| ENSOCUG00000001048 | THADA    | 0,497 | 0,626 |
| ENSOCUG00000012120 | SPARC    | 0,496 | 0,551 |
| ENSOCUG00000017336 | CLCN5    | 0,495 | 0,499 |
| ENSOCUG00000017172 | HIST4H4  | 0,492 | 0,515 |
| ENSOCUG00000005082 | QARS     | 0,491 | 0,487 |
| ENSOCUG00000008556 | NAB1     | 0,491 | 0,603 |
| ENSOCUG00000000076 | SLC43A2  | 0,490 | 0,618 |
| ENSOCUG00000015538 | SLC35A3  | 0,488 | 0,437 |
| ENSOCUG00000003208 | DOCK8    | 0,488 | 0,556 |
| ENSOCUG00000008111 | LRRC42   | 0,488 | 0,518 |
| ENSOCUG00000005734 | UTP4     | 0,487 | 0,460 |
| ENSOCUG00000011955 | SIDT2    | 0,486 | 0,621 |
| ENSOCUG00000006059 | PFN2     | 0,485 | 0,564 |
| ENSOCUG00000017212 | AMFR     | 0,484 | 0,560 |
| ENSOCUG00000016563 | DYNLL2   | 0,484 | 0,362 |
| ENSOCUG00000014672 | GNG2     | 0,482 | 0,600 |

|                    |         |       |       |
|--------------------|---------|-------|-------|
| ENSOCUG00000002610 | UBE2L3  | 0,480 | 0,529 |
| ENSOCUG00000012192 | AASDH   | 0,480 | 0,402 |
| ENSOCUG00000011509 | RPS14   | 0,479 | 0,581 |
| ENSOCUG00000000489 | TTC13   | 0,479 | 0,439 |
| ENSOCUG00000016381 | BROX    | 0,478 | 0,410 |
| ENSOCUG00000000907 | STK35   | 0,478 | 0,535 |
| ENSOCUG00000005471 | PREPL   | 0,478 | 0,496 |
| ENSOCUG00000014088 | ETNK1   | 0,477 | 0,595 |
| ENSOCUG00000012468 | ASNSD1  | 0,477 | 0,758 |
| ENSOCUG00000001542 | RIPK2   | 0,476 | 0,512 |
| ENSOCUG00000012011 | TRAF6   | 0,476 | 0,519 |
| ENSOCUG00000010069 | RNF41   | 0,474 | 0,473 |
| ENSOCUG00000013596 | SLC4A7  | 0,473 | 0,293 |
| ENSOCUG00000017812 | TCF12   | 0,473 | 0,566 |
| ENSOCUG00000001418 | PSMD14  | 0,473 | 0,379 |
| ENSOCUG00000010989 | FBXL20  | 0,472 | 0,510 |
| ENSOCUG00000011764 | LPP     | 0,472 | 0,428 |
| ENSOCUG00000011453 | PPIH    | 0,471 | 0,415 |
| ENSOCUG00000009152 | RFWD3   | 0,471 | 0,561 |
| ENSOCUG00000009949 | CD200   | 0,470 | 0,434 |
| ENSOCUG00000016963 | GNPDA1  | 0,470 | 0,429 |
| ENSOCUG00000011355 | SCPEP1  | 0,469 | 0,478 |
| ENSOCUG00000016965 | OGT     | 0,469 | 0,446 |
| ENSOCUG00000000520 | CNIH4   | 0,468 | 0,472 |
| ENSOCUG00000015354 | ITCH    | 0,467 | 0,288 |
| ENSOCUG00000007784 | TMEM199 | 0,467 | 0,395 |
| ENSOCUG00000017089 | SNX17   | 0,466 | 0,658 |
| ENSOCUG00000004669 | TMED10  | 0,466 | 0,355 |
| ENSOCUG00000006352 | FOXRED2 | 0,465 | 0,593 |
| ENSOCUG00000002199 | GATA4   | 0,465 | 0,618 |
| ENSOCUG00000022874 | RPL7A   | 0,465 | 0,445 |
| ENSOCUG00000011515 | NDST1   | 0,464 | 0,612 |
| ENSOCUG00000003142 | AR      | 0,463 | 0,842 |
| ENSOCUG00000000368 | THAP6   | 0,462 | 0,347 |
| ENSOCUG00000006714 | MMP2    | 0,462 | 0,603 |
| ENSOCUG00000000566 | XPR1    | 0,462 | 0,356 |
| ENSOCUG00000025635 | CAMKK2  | 0,462 | 0,896 |
| ENSOCUG00000003377 | CYP27A1 | 0,461 | 0,512 |
| ENSOCUG00000003778 | AP4B1   | 0,461 | 0,440 |
| ENSOCUG00000012620 | WRN     | 0,460 | 0,371 |
| ENSOCUG00000024409 | MON1B   | 0,460 | 0,555 |
| ENSOCUG00000027435 | RPS11   | 0,459 | 0,549 |
| ENSOCUG00000004827 | SFXN1   | 0,458 | 0,417 |
| ENSOCUG00000008704 | SPATA6  | 0,457 | 0,494 |
| ENSOCUG00000013689 | LAPTM4B | 0,457 | 0,634 |

|                    |          |       |       |
|--------------------|----------|-------|-------|
| ENSOCUG00000009774 | LAPTM5   | 0,457 | 0,488 |
| ENSOCUG00000001486 | ZNF639   | 0,456 | 0,377 |
| ENSOCUG00000010638 | INTS4    | 0,455 | 0,575 |
| ENSOCUG00000016739 | UBE2A    | 0,454 | 0,359 |
| ENSOCUG00000003196 | CLIC4    | 0,454 | 0,370 |
| ENSOCUG00000012528 | ST3GAL4  | 0,453 | 0,741 |
| ENSOCUG00000010280 | PGRMC1   | 0,453 | 0,489 |
| ENSOCUG00000002751 | SFXN3    | 0,453 | 0,536 |
| ENSOCUG00000012017 | CHSY1    | 0,452 | 0,395 |
| ENSOCUG00000005533 | SCN2A    | 0,451 | 0,456 |
| ENSOCUG00000010080 | LRRC36   | 0,450 | 0,482 |
| ENSOCUG00000023595 | NDFIP1   | 0,450 | 0,389 |
| ENSOCUG00000012610 | CDON     | 0,450 | 0,729 |
| ENSOCUG00000009521 | TCEAL8   | 0,449 | 0,370 |
| ENSOCUG00000008604 | RAB31    | 0,448 | 0,477 |
| ENSOCUG00000015528 | C16orf72 | 0,448 | 0,402 |
| ENSOCUG00000003648 | XPNPEP1  | 0,448 | 0,580 |
| ENSOCUG00000016729 | PRIM2    | 0,447 | 0,559 |
| ENSOCUG00000003504 | SLFN13   | 0,445 | 0,445 |
| ENSOCUG00000000807 | PLEKHA8  | 0,444 | 0,419 |
| ENSOCUG00000003333 | LIFR     | 0,444 | 0,492 |
| ENSOCUG00000017377 | MATN2    | 0,443 | 0,841 |
| ENSOCUG00000017959 | PIGV     | 0,442 | 0,770 |
| ENSOCUG00000004130 | COG4     | 0,442 | 0,287 |
| ENSOCUG00000024795 | MNDA     | 0,441 | 0,434 |
| ENSOCUG00000007744 | CTNNA1   | 0,441 | 0,332 |
| ENSOCUG00000014107 | AREL1    | 0,439 | 0,281 |
| ENSOCUG00000007022 | PHF6     | 0,439 | 0,552 |
| ENSOCUG00000000649 | SLC36A4  | 0,437 | 0,339 |
| ENSOCUG00000016136 | SPG21    | 0,436 | 0,396 |
| ENSOCUG00000015443 | ADCY3    | 0,436 | 0,431 |
| ENSOCUG00000010569 | ERBB2    | 0,435 | 0,649 |
| ENSOCUG00000011443 | DDR2     | 0,435 | 0,409 |
| ENSOCUG00000002312 | TEP1     | 0,434 | 0,406 |
| ENSOCUG00000026068 | LDLRAD3  | 0,431 | 0,616 |
| ENSOCUG00000013782 | PHKA2    | 0,431 | 0,615 |
| ENSOCUG00000008388 | CCNG2    | 0,431 | 0,554 |
| ENSOCUG00000003313 | LOX      | 0,430 | 0,487 |
| ENSOCUG00000008071 | CST3     | 0,429 | 0,619 |
| ENSOCUG00000004811 | DERL2    | 0,428 | 0,496 |
| ENSOCUG00000013049 | PLXND1   | 0,427 | 0,385 |
| ENSOCUG00000016199 | BCL10    | 0,426 | 0,372 |
| ENSOCUG00000000498 | TVP23B   | 0,423 | 0,407 |
| ENSOCUG00000004488 | GMFB     | 0,423 | 0,333 |
| ENSOCUG00000006041 | PLS3     | 0,422 | 0,378 |

|                    |          |       |       |
|--------------------|----------|-------|-------|
| ENSOCUG00000017961 | CPNE3    | 0,422 | 0,684 |
| ENSOCUG00000015020 | COL5A2   | 0,422 | 0,542 |
| ENSOCUG00000009778 | ANKRD46  | 0,421 | 0,436 |
| ENSOCUG00000014711 | CAPZB    | 0,421 | 0,262 |
| ENSOCUG00000010999 | LRRC57   | 0,420 | 0,654 |
| ENSOCUG00000000345 | C8orf46  | 0,420 | 0,698 |
| ENSOCUG00000013478 | HTRA1    | 0,420 | 0,352 |
| ENSOCUG00000005881 | IPO13    | 0,420 | 0,329 |
| ENSOCUG00000011934 | EPHX1    | 0,418 | 0,662 |
| ENSOCUG00000009743 | MTMR4    | 0,418 | 0,267 |
| ENSOCUG00000027117 | LRRC41   | 0,417 | 0,628 |
| ENSOCUG00000009236 | FAM135A  | 0,416 | 0,429 |
| ENSOCUG00000006507 | FUCA1    | 0,416 | 0,568 |
| ENSOCUG00000008622 | TRAPPC9  | 0,416 | 0,336 |
| ENSOCUG00000004337 | SMARCD2  | 0,416 | 0,615 |
| ENSOCUG00000003607 | AIG1     | 0,416 | 0,497 |
| ENSOCUG00000016677 | AEBP2    | 0,415 | 0,453 |
| ENSOCUG00000001798 | ACAP2    | 0,414 | 0,455 |
| ENSOCUG00000026735 | PPME1    | 0,413 | 0,404 |
| ENSOCUG00000010955 | HSPG2    | 0,412 | 0,500 |
| ENSOCUG00000016413 | CLTC     | 0,412 | 0,424 |
| ENSOCUG00000010669 | DSEL     | 0,412 | 0,368 |
| ENSOCUG00000007681 | FAM214A  | 0,412 | 0,295 |
| ENSOCUG00000002042 | NAALADL2 | 0,411 | 0,444 |
| ENSOCUG00000016176 | REEP3    | 0,411 | 0,471 |
| ENSOCUG00000003028 | STN1     | 0,411 | 0,476 |
| ENSOCUG00000016722 | RAPH1    | 0,411 | 0,448 |
| ENSOCUG00000009927 | HERC4    | 0,410 | 0,288 |
| ENSOCUG00000011223 | PLRG1    | 0,409 | 0,348 |
| ENSOCUG00000004103 | IRAK4    | 0,409 | 0,383 |
| ENSOCUG00000005717 | GCN1     | 0,408 | 0,422 |
| ENSOCUG00000012843 | CERS5    | 0,406 | 0,518 |
| ENSOCUG00000001425 | VIPAS39  | 0,406 | 0,448 |
| ENSOCUG00000006317 | SPG11    | 0,405 | 0,504 |
| ENSOCUG00000007019 | SKIV2L   | 0,405 | 0,855 |
| ENSOCUG00000005292 | TRIM2    | 0,404 | 0,461 |
| ENSOCUG00000014843 | ANKFY1   | 0,402 | 0,402 |
| ENSOCUG00000012508 | AVL9     | 0,401 | 0,328 |
| ENSOCUG00000015127 | SYPL1    | 0,401 | 0,240 |
| ENSOCUG00000010426 | AGFG1    | 0,399 | 0,258 |
| ENSOCUG00000006604 | TPP1     | 0,398 | 0,299 |
| ENSOCUG00000004233 | INVS     | 0,398 | 0,449 |
| ENSOCUG00000022412 | RPS3     | 0,398 | 0,456 |
| ENSOCUG00000004483 | EIF3M    | 0,397 | 0,388 |
| ENSOCUG00000013853 | NCBP1    | 0,396 | 0,292 |

|                    |          |       |       |
|--------------------|----------|-------|-------|
| ENSOCUG00000010653 | CLK1     | 0,395 | 0,427 |
| ENSOCUG00000024126 | DDX39B   | 0,395 | 0,504 |
| ENSOCUG00000006924 | FAM171A1 | 0,393 | 0,609 |
| ENSOCUG00000013101 | PARVA    | 0,393 | 0,371 |
| ENSOCUG00000013114 | CHUK     | 0,392 | 0,301 |
| ENSOCUG00000014589 | CNOT7    | 0,392 | 0,263 |
| ENSOCUG00000000824 | ARF4     | 0,391 | 0,512 |
| ENSOCUG00000008982 | BLZF1    | 0,391 | 0,365 |
| ENSOCUG00000008764 | TGOLN2   | 0,391 | 0,408 |
| ENSOCUG00000017608 | PTBP2    | 0,389 | 0,476 |
| ENSOCUG00000011187 | COPS7A   | 0,389 | 0,320 |
| ENSOCUG00000026332 | SERF2    | 0,389 | 0,386 |
| ENSOCUG00000013185 | WDR35    | 0,388 | 0,625 |
| ENSOCUG00000027397 | Uox      | 0,387 | 0,496 |
| ENSOCUG00000013319 | TCTA     | 0,386 | 0,484 |
| ENSOCUG00000000409 | COL6A2   | 0,385 | 0,460 |
| ENSOCUG00000027987 | CSPG4    | 0,385 | 0,327 |
| ENSOCUG00000002074 | RPL29    | 0,384 | 0,381 |
| ENSOCUG00000002727 | XPO6     | 0,383 | 0,513 |
| ENSOCUG00000017060 | GTF3C2   | 0,383 | 0,265 |
| ENSOCUG00000013696 | BICC1    | 0,383 | 0,482 |
| ENSOCUG00000015837 | GM2A     | 0,382 | 0,436 |
| ENSOCUG00000011074 | TMEM43   | 0,381 | 0,557 |
| ENSOCUG00000012051 | ANKH     | 0,380 | 0,377 |
| ENSOCUG00000013510 | DCTN4    | 0,379 | 0,314 |
| ENSOCUG00000029156 | PRELID2  | 0,378 | 0,574 |
| ENSOCUG00000010058 | ZBTB44   | 0,378 | 0,307 |
| ENSOCUG00000027241 | MFAP3    | 0,378 | 0,420 |
| ENSOCUG00000008660 | SRPK1    | 0,378 | 0,294 |
| ENSOCUG00000010649 | MKX      | 0,377 | 0,505 |
| ENSOCUG00000003252 | MYNN     | 0,375 | 0,296 |
| ENSOCUG00000017760 | ANXA5    | 0,375 | 0,432 |
| ENSOCUG00000003507 | HAUS6    | 0,375 | 0,357 |
| ENSOCUG00000008003 | KDM5B    | 0,375 | 0,345 |
| ENSOCUG00000007344 | DSE      | 0,373 | 0,450 |
| ENSOCUG00000015267 | GPX8     | 0,371 | 0,439 |
| ENSOCUG00000011423 | LMBRD2   | 0,371 | 0,377 |
| ENSOCUG00000026209 | NPAT     | 0,371 | 0,452 |
| ENSOCUG00000000931 | GNB4     | 0,371 | 0,397 |
| ENSOCUG00000012771 | COG5     | 0,371 | 0,229 |
| ENSOCUG00000014970 | ACSL3    | 0,368 | 0,303 |
| ENSOCUG00000008289 | FBXO7    | 0,366 | 0,363 |
| ENSOCUG00000015088 | RETREG2  | 0,365 | 0,536 |
| ENSOCUG00000003553 | SH3GLB1  | 0,364 | 0,471 |
| ENSOCUG00000005531 | UGDH     | 0,363 | 0,275 |

|                    |         |       |       |
|--------------------|---------|-------|-------|
| ENSOCUG00000016083 | TGFBR3  | 0,362 | 0,475 |
| ENSOCUG00000005373 | MFSD14B | 0,360 | 0,312 |
| ENSOCUG00000000847 | PTPRD   | 0,360 | 0,419 |
| ENSOCUG00000003245 | GNB2L1  | 0,359 | 0,441 |
| ENSOCUG00000014741 | KDM6A   | 0,358 | 0,386 |
| ENSOCUG00000008567 | NF1     | 0,358 | 0,384 |
| ENSOCUG00000002432 | KDELC1  | 0,355 | 0,355 |
| ENSOCUG00000017522 | TGS1    | 0,355 | 0,346 |
| ENSOCUG00000006944 | SPOPL   | 0,355 | 0,349 |
| ENSOCUG00000001461 | PLOD2   | 0,355 | 0,553 |
| ENSOCUG00000000102 | BBS9    | 0,354 | 0,353 |
| ENSOCUG00000003451 | CCNL1   | 0,353 | 0,455 |
| ENSOCUG00000000956 | ZFYVE9  | 0,352 | 0,317 |
| ENSOCUG00000017399 | RNF139  | 0,352 | 0,373 |
| ENSOCUG00000007383 | CCNT1   | 0,352 | 0,343 |
| ENSOCUG00000007150 | VPS4B   | 0,350 | 0,395 |
| ENSOCUG00000005144 | STXBP6  | 0,349 | 0,389 |
| ENSOCUG00000013890 | BIRC2   | 0,349 | 0,413 |
| ENSOCUG00000012948 | DOCK7   | 0,348 | 0,450 |
| ENSOCUG00000014552 | TIPRL   | 0,348 | 0,276 |
| ENSOCUG00000014007 | HEATR1  | 0,347 | 0,292 |
| ENSOCUG00000016298 | ATP6V1H | 0,347 | 0,336 |
| ENSOCUG00000025834 | YAP1    | 0,347 | 0,493 |
| ENSOCUG00000000750 | PRMT3   | 0,347 | 0,381 |
| ENSOCUG00000012309 | SGCE    | 0,346 | 0,636 |
| ENSOCUG00000002991 | CLCC1   | 0,345 | 0,334 |
| ENSOCUG00000010702 | NUMB    | 0,345 | 0,335 |
| ENSOCUG00000007477 | IPO9    | 0,344 | 0,461 |
| ENSOCUG00000002884 | JAG1    | 0,343 | 0,326 |
| ENSOCUG00000003710 | SPPL2A  | 0,342 | 0,314 |
| ENSOCUG00000007228 | HEATR5A | 0,342 | 0,359 |
| ENSOCUG00000017086 | ZMYM2   | 0,341 | 0,364 |
| ENSOCUG00000001311 | CELF1   | 0,341 | 0,221 |
| ENSOCUG00000011184 | TSPAN6  | 0,341 | 0,430 |
| ENSOCUG00000029552 | RAP1B   | 0,339 | 0,360 |
| ENSOCUG00000006277 | BNIP2   | 0,339 | 0,295 |
| ENSOCUG00000004412 | AP1G1   | 0,339 | 0,447 |
| ENSOCUG00000002512 | WDR7    | 0,339 | 0,282 |
| ENSOCUG00000009492 | POGLUT1 | 0,337 | 0,373 |
| ENSOCUG00000010631 | PIK3CA  | 0,335 | 0,336 |
| ENSOCUG00000003783 | TIAL1   | 0,334 | 0,250 |
| ENSOCUG00000016750 | SLC41A2 | 0,334 | 0,296 |
| ENSOCUG00000010609 | DUSP16  | 0,334 | 0,446 |
| ENSOCUG00000008195 | ZNF207  | 0,334 | 0,259 |
| ENSOCUG00000013692 | MAPK1   | 0,333 | 0,421 |

|                    |          |       |       |
|--------------------|----------|-------|-------|
| ENSOCUG00000011896 | FBXL3    | 0,333 | 0,372 |
| ENSOCUG00000010815 | CDC27    | 0,333 | 0,306 |
| ENSOCUG00000000081 | PRPF8    | 0,332 | 0,350 |
| ENSOCUG00000008403 | USP11    | 0,331 | 0,404 |
| ENSOCUG00000029416 | MAPK14   | 0,331 | 0,361 |
| ENSOCUG00000010827 | BOC      | 0,331 | 0,553 |
| ENSOCUG00000015532 | CACHD1   | 0,331 | 0,769 |
| ENSOCUG00000023323 | LYSMD3   | 0,330 | 0,290 |
| ENSOCUG00000013065 | KLHL24   | 0,330 | 0,261 |
| ENSOCUG00000015785 | WASHC5   | 0,330 | 0,459 |
| ENSOCUG00000004576 | ANKIB1   | 0,329 | 0,279 |
| ENSOCUG00000015292 | NEDD9    | 0,327 | 0,546 |
| ENSOCUG00000007590 | SUCO     | 0,326 | 0,311 |
| ENSOCUG00000017291 | FBXO38   | 0,325 | 0,291 |
| ENSOCUG00000014663 | ATM      | 0,325 | 0,380 |
| ENSOCUG00000012352 | DCUN1D4  | 0,324 | 0,336 |
| ENSOCUG00000001191 | LYRM1    | 0,323 | 0,268 |
| ENSOCUG00000001439 | FAT1     | 0,323 | 0,397 |
| ENSOCUG00000004986 | XPO1     | 0,323 | 0,527 |
| ENSOCUG00000013953 | RPS6KC1  | 0,323 | 0,294 |
| ENSOCUG00000007361 | EXT2     | 0,322 | 0,479 |
| ENSOCUG00000009294 | EFR3A    | 0,322 | 0,414 |
| ENSOCUG00000023809 | PICALM   | 0,321 | 0,287 |
| ENSOCUG00000014775 | USP3     | 0,321 | 0,382 |
| ENSOCUG00000010731 | ARHGEF11 | 0,320 | 0,397 |
| ENSOCUG00000017003 | RAB1A    | 0,317 | 0,270 |
| ENSOCUG00000016016 | AKAP11   | 0,316 | 0,282 |
| ENSOCUG00000004225 | EIF3F    | 0,316 | 0,565 |
| ENSOCUG00000003929 | SMAD4    | 0,316 | 0,307 |
| ENSOCUG00000012117 | LTN1     | 0,316 | 0,316 |
| ENSOCUG00000015742 | CEPT1    | 0,314 | 0,501 |
| ENSOCUG00000017908 | PUM2     | 0,314 | 0,300 |
| ENSOCUG00000013639 | ADGRL2   | 0,314 | 0,291 |
| ENSOCUG00000003404 | MAN2A1   | 0,312 | 0,400 |
| ENSOCUG00000001554 | TANC2    | 0,311 | 0,559 |
| ENSOCUG00000023994 | CPNE1    | 0,311 | 0,577 |
| ENSOCUG00000005332 | CDC14B   | 0,310 | 0,384 |
| ENSOCUG00000002065 | TCAF1    | 0,310 | 0,405 |
| ENSOCUG00000000625 | VPS50    | 0,309 | 0,370 |
| ENSOCUG00000016002 | DPYSL2   | 0,309 | 0,499 |
| ENSOCUG00000005831 | RPN2     | 0,308 | 0,281 |
| ENSOCUG00000024483 | PTGES3   | 0,307 | 0,481 |
| ENSOCUG00000013272 | SEC24D   | 0,306 | 0,304 |
| ENSOCUG00000006593 | ILK      | 0,305 | 0,249 |
| ENSOCUG00000001142 | SNX13    | 0,303 | 0,278 |

|                    |          |       |       |
|--------------------|----------|-------|-------|
| ENSOCUG00000017001 | KANSL1L  | 0,303 | 0,347 |
| ENSOCUG00000000758 | SLC25A27 | 0,303 | 0,304 |
| ENSOCUG00000027658 | ERGIC3   | 0,302 | 0,434 |
| ENSOCUG00000008716 | NBEAL1   | 0,302 | 0,337 |
| ENSOCUG00000014677 | STT3A    | 0,302 | 0,226 |
| ENSOCUG00000004871 | RARS2    | 0,301 | 0,271 |
| ENSOCUG00000012455 | MDFIC    | 0,301 | 0,330 |
| ENSOCUG00000013495 | TM9SF4   | 0,301 | 0,361 |
| ENSOCUG00000001468 | CTNNB1   | 0,299 | 0,178 |
| ENSOCUG00000012692 | TMPO     | 0,299 | 0,316 |
| ENSOCUG00000002448 | GLS      | 0,297 | 0,512 |
| ENSOCUG00000002100 | PLEKHA1  | 0,296 | 0,249 |
| ENSOCUG00000005291 | KIAA1468 | 0,296 | 0,336 |
| ENSOCUG00000025925 | HNRNPK   | 0,295 | 0,263 |
| ENSOCUG00000027209 | ST6GAL1  | 0,294 | 0,677 |
| ENSOCUG00000001784 | DNAJC10  | 0,293 | 0,19  |
| ENSOCUG00000003388 | SCARB2   | 0,292 | 0,358 |
| ENSOCUG00000022505 | SKP1     | 0,291 | 0,229 |
| ENSOCUG00000002439 | ACVR1    | 0,290 | 0,564 |
| ENSOCUG00000013212 | ACLY     | 0,290 | 0,344 |
| ENSOCUG00000010432 | MBD5     | 0,290 | 0,361 |
| ENSOCUG00000005327 | TFG      | 0,287 | 0,246 |
| ENSOCUG00000013263 | FAM208A  | 0,285 | 0,302 |
| ENSOCUG00000001578 | CUL7     | 0,284 | 0,554 |
| ENSOCUG00000014363 | PCNX2    | 0,283 | 0,292 |
| ENSOCUG00000003759 | RSBN1    | 0,283 | 0,304 |
| ENSOCUG00000027465 | ICK      | 0,283 | 0,371 |
| ENSOCUG00000000170 | NUP155   | 0,283 | 0,278 |
| ENSOCUG00000029667 | CUBN     | 0,282 | 0,348 |
| ENSOCUG00000010401 | ZDHHC17  | 0,280 | 0,368 |
| ENSOCUG00000006900 | PIAS2    | 0,279 | 0,222 |
| ENSOCUG00000014520 | CAV1     | 0,276 | 0,158 |
| ENSOCUG00000008455 | SSR2     | 0,276 | 0,298 |
| ENSOCUG00000002669 | TCF4     | 0,273 | 0,216 |
| ENSOCUG00000002975 | STXBP3   | 0,273 | 0,211 |
| ENSOCUG00000014277 | ABHD4    | 0,273 | 0,409 |
| ENSOCUG00000012633 | MORC4    | 0,273 | 0,407 |
| ENSOCUG00000014160 | ATP7A    | 0,272 | 0,405 |
| ENSOCUG00000005209 | ZNF644   | 0,270 | 0,253 |
| ENSOCUG00000002924 | LGALS3   | 0,270 | 0,270 |
| ENSOCUG00000016580 | CTSB     | 0,268 | 0,442 |
| ENSOCUG00000017078 | TBL1XR1  | 0,268 | 0,342 |
| ENSOCUG00000005030 | WASHC4   | 0,268 | 0,254 |
| ENSOCUG00000016117 | AMBRA1   | 0,266 | 0,455 |
| ENSOCUG00000009227 | CDK14    | 0,266 | 0,286 |



|                    |          |       |       |
|--------------------|----------|-------|-------|
| ENSOCUG00000026080 | SACM1L   | 0,265 | 0,439 |
| ENSOCUG00000005403 | SLC30A6  | 0,265 | 0,337 |
| ENSOCUG00000016010 | LMBRD1   | 0,265 | 0,236 |
| ENSOCUG00000014819 | ZZEF1    | 0,265 | 0,225 |
| ENSOCUG00000012200 | RAB5A    | 0,264 | 0,206 |
| ENSOCUG00000017283 | SMARCAD1 | 0,262 | 0,254 |
| ENSOCUG00000014213 | CTNND1   | 0,262 | 0,229 |
| ENSOCUG00000005266 | SENP7    | 0,262 | 0,359 |
| ENSOCUG00000022530 | ACVRL1   | 0,260 | 0,323 |
| ENSOCUG00000011293 | YME1L1   | 0,259 | 0,185 |
| ENSOCUG00000001420 | SYNJ1    | 0,259 | 0,329 |
| ENSOCUG00000011302 | RPL10    | 0,258 | 0,277 |
| ENSOCUG00000003320 | DENND4C  | 0,258 | 0,326 |
| ENSOCUG00000005092 | USP19    | 0,258 | 0,460 |
| ENSOCUG00000008421 | KDM3B    | 0,257 | 0,263 |
| ENSOCUG00000012292 | CASD1    | 0,257 | 0,367 |
| ENSOCUG00000007601 | MBNL1    | 0,256 | 0,262 |
| ENSOCUG00000017155 | WDFY3    | 0,256 | 0,299 |
| ENSOCUG00000012937 | PRKACB   | 0,255 | 0,307 |
| ENSOCUG00000006378 | TOGARAM1 | 0,255 | 0,334 |
| ENSOCUG00000006669 | CSNK1A1  | 0,255 | 0,269 |
| ENSOCUG00000017837 | SESTD1   | 0,253 | 0,326 |
| ENSOCUG00000003950 | EPG5     | 0,252 | 0,465 |
| ENSOCUG00000005948 | DMXL2    | 0,251 | 0,464 |
| ENSOCUG00000017386 | RPL30    | 0,250 | 0,297 |
| ENSOCUG00000006684 | SRSF3    | 0,249 | 0,291 |
| ENSOCUG00000006207 | BTBD7    | 0,248 | 0,213 |
| ENSOCUG00000006354 | RBL2     | 0,247 | 0,270 |
| ENSOCUG00000006911 | CNOT1    | 0,247 | 0,259 |
| ENSOCUG00000003338 | RNF111   | 0,246 | 0,214 |
| ENSOCUG00000002445 | HP1BP3   | 0,246 | 0,190 |
| ENSOCUG00000008929 | SNX14    | 0,244 | 0,254 |
| ENSOCUG00000003802 | RPL6     | 0,241 | 0,282 |
| ENSOCUG00000016281 | MKLN1    | 0,241 | 0,296 |
| ENSOCUG00000010777 | DOPEY1   | 0,236 | 0,230 |
| ENSOCUG00000006600 | BIRC6    | 0,236 | 0,221 |
| ENSOCUG00000008050 | EIF3E    | 0,234 | 0,282 |
| ENSOCUG00000016495 | VIRMA    | 0,234 | 0,286 |
| ENSOCUG00000011549 | SPATS2L  | 0,231 | 0,260 |
| ENSOCUG00000015169 | ATP6V0A1 | 0,231 | 0,331 |
| ENSOCUG00000002148 | OSBP     | 0,230 | 0,216 |
| ENSOCUG00000026003 | RBBP4    | 0,228 | 0,227 |
| ENSOCUG00000017012 | ZC3H7A   | 0,228 | 0,269 |
| ENSOCUG00000005304 | RPS17    | 0,228 | 0,210 |
| ENSOCUG00000017056 | PKN2     | 0,228 | 0,191 |

|                    |          |       |        |
|--------------------|----------|-------|--------|
| ENSOCUG00000012757 | NUP205   | 0,228 | 0,266  |
| ENSOCUG00000010232 | ANTXR1   | 0,228 | 0,396  |
| ENSOCUG00000016551 | C1QTNF7  | 0,226 | 0,247  |
| ENSOCUG00000012525 | KBTBD2   | 0,225 | 0,222  |
| ENSOCUG00000001480 | GMPS     | 0,225 | 0,237  |
| ENSOCUG00000013806 | SORT1    | 0,224 | 0,190  |
| ENSOCUG00000016004 | ANAPC4   | 0,222 | 0,233  |
| ENSOCUG00000004906 | ACTR2    | 0,219 | 0,206  |
| ENSOCUG00000016925 | BMPR1A   | 0,213 | 0,288  |
| ENSOCUG00000007198 | USP9X    | 0,213 | 0,148  |
| ENSOCUG00000017371 | MYL6     | 0,212 | 0,295  |
| ENSOCUG00000007534 | EIF3H    | 0,212 | 0,279  |
| ENSOCUG00000002187 | TUBB     | 0,211 | 0,264  |
| ENSOCUG00000013912 | WDR11    | 0,208 | 0,250  |
| ENSOCUG00000011880 | SPIN1    | 0,199 | 0,345  |
| ENSOCUG00000006616 | EFCAB14  | 0,197 | 0,271  |
| ENSOCUG00000002867 | LYST     | 0,195 | 0,203  |
| ENSOCUG00000009010 | PI4KA    | 0,195 | 0,258  |
| ENSOCUG00000002775 | NSD1     | 0,193 | 0,164  |
| ENSOCUG00000005111 | N4BP2    | 0,193 | 0,384  |
| ENSOCUG00000006807 | RALGAPA1 | 0,192 | 0,297  |
| ENSOCUG00000003520 | HLTF     | 0,189 | 0,242  |
| ENSOCUG00000000051 | DMXL1    | 0,189 | 0,167  |
| ENSOCUG00000017163 | C2CD5    | 0,187 | 0,157  |
| ENSOCUG00000010548 | ARHGAP5  | 0,184 | 0,207  |
| ENSOCUG00000010203 | TLN1     | 0,182 | 0,298  |
| ENSOCUG00000002676 | PIKFYVE  | 0,182 | 0,272  |
| ENSOCUG00000012331 | UBR1     | 0,182 | 0,242  |
| ENSOCUG00000016257 | DYNC2H1  | 0,182 | 0,290  |
| ENSOCUG00000013133 | NCKAP1   | 0,176 | 0,172  |
| ENSOCUG00000005741 | MARCH6   | 0,171 | 0,232  |
| ENSOCUG00000008928 | SMU1     | 0,170 | 0,243  |
| ENSOCUG00000017419 | PRKAR1A  | 0,169 | 0,148  |
| ENSOCUG00000006709 | MED13    | 0,167 | 0,169  |
| ENSOCUG00000000996 | CLASP2   | 0,163 | 0,126  |
| ENSOCUG00000022490 | PCBP2    | 0,162 | 0,234  |
| ENSOCUG00000000264 | UBR4     | 0,158 | 0,119  |
| ENSOCUG00000017435 | RIF1     | -0,15 | -0,156 |
| ENSOCUG00000010460 | NCOR1    | -0,15 | -0,193 |
| ENSOCUG00000015381 | QSER1    | -0,16 | -0,167 |
| ENSOCUG00000001839 | PPP2R3A  | -0,16 | -0,272 |
| ENSOCUG00000002855 | ATXN2    | -0,16 | -0,207 |
| ENSOCUG00000016401 | PHIP     | -0,16 | -0,146 |
| ENSOCUG00000015080 | UTRN     | -0,17 | -0,238 |
| ENSOCUG00000025405 | GDI2     | -0,17 | -0,231 |

|                     |           |       |        |
|---------------------|-----------|-------|--------|
| ENSOCUG00000006754  | HERC2     | -0,17 | -0,195 |
| ENSOCUG00000005196  | ARHGEF12  | -0,18 | -0,260 |
| ENSOCUG00000000677  | MACF1     | -0,18 | -0,182 |
| ENSOCUG00000006443  | SECISBP2L | -0,18 | -0,253 |
| ENSOCUG00000006190  | NCAM1     | -0,18 | -0,248 |
| ENSOCUG00000003899  | SCAF11    | -0,18 | -0,304 |
| ENSOCUG00000008438  | SRRM1     | -0,19 | -0,207 |
| ENSOCUG00000001215  | HIPK3     | -0,19 | -0,362 |
| ENSOCUG00000005996  | THOC2     | -0,19 | -0,192 |
| ENSOCUG00000007354  | HUWE1     | -0,19 | -0,271 |
| ENSOCUG00000007293  | CLPX      | -0,19 | -0,387 |
| ENSOCUG00000006686  | HNRNPR    | -0,19 | -0,182 |
| ENSOCUG000000014074 | DST       | -0,20 | -0,312 |
| ENSOCUG00000005008  | SPTBN1    | -0,20 | -0,218 |
| ENSOCUG000000021376 | PTPRA     | -0,20 | -0,226 |
| ENSOCUG00000000462  | OXR1      | -0,20 | -0,299 |
| ENSOCUG00000002768  | MGEA5     | -0,20 | -0,224 |
| ENSOCUG000000014615 | MSH6      | -0,21 | -0,253 |
| ENSOCUG00000008760  | MTX2      | -0,21 | -0,236 |
| ENSOCUG000000010288 | TMEM106B  | -0,21 | -0,190 |
| ENSOCUG000000024887 | CAPRIN1   | -0,21 | -0,179 |
| ENSOCUG000000011595 | USP14     | -0,21 | -0,437 |
| ENSOCUG000000017331 | NAA15     | -0,21 | -0,288 |
| ENSOCUG000000016430 | SEC63     | -0,22 | -0,198 |
| ENSOCUG000000009717 | SNW1      | -0,22 | -0,227 |
| ENSOCUG000000012730 | TAX1BP1   | -0,22 | -0,433 |
| ENSOCUG000000013323 | RHOA      | -0,22 | -0,240 |
| ENSOCUG000000012707 | ELOA      | -0,22 | -0,246 |
| ENSOCUG000000003686 | USP8      | -0,22 | -0,268 |
| ENSOCUG000000004996 | EIF3A     | -0,22 | -0,369 |
| ENSOCUG000000009371 | RMND5A    | -0,22 | -0,197 |
| ENSOCUG000000010051 | APLP2     | -0,22 | -0,264 |
| ENSOCUG000000009082 | VDAC2     | -0,22 | -0,566 |
| ENSOCUG000000022489 | EIF3C     | -0,22 | -0,205 |
| ENSOCUG000000009614 | PHACTR2   | -0,23 | -0,292 |
| ENSOCUG000000005461 | PPM1B     | -0,23 | -0,221 |
| ENSOCUG000000029173 | RNF103    | -0,23 | -0,212 |
| ENSOCUG000000016601 | SSH2      | -0,23 | -0,375 |
| ENSOCUG000000006997 | GABARAP   | -0,23 | -0,192 |
| ENSOCUG000000006794 | OPTN      | -0,23 | -0,361 |
| ENSOCUG000000005079 | CEP76     | -0,23 | -0,445 |
| ENSOCUG000000006262 | SUB1      | -0,23 | -0,331 |
| ENSOCUG000000013255 | DNAJC7    | -0,23 | -0,400 |
| ENSOCUG000000015867 | ARFGEF1   | -0,23 | -0,301 |
| ENSOCUG000000009955 | PPM1A     | -0,23 | -0,381 |

|                    |          |       |        |
|--------------------|----------|-------|--------|
| ENSOCUG00000013550 | USF3     | -0,23 | -0,344 |
| ENSOCUG00000005888 | NIPBL    | -0,23 | -0,203 |
| ENSOCUG00000011765 | CC2D2A   | -0,23 | -0,331 |
| ENSOCUG00000021848 | NONO     | -0,23 | -0,176 |
| ENSOCUG00000017366 | R3HDM1   | -0,23 | -0,375 |
| ENSOCUG00000000817 | SPAG9    | -0,24 | -0,244 |
| ENSOCUG00000017880 | EMSY     | -0,24 | -0,254 |
| ENSOCUG00000001971 | BMPR2    | -0,24 | -0,164 |
| ENSOCUG00000016723 | SPOP     | -0,24 | -0,295 |
| ENSOCUG00000005362 | CASC4    | -0,24 | -0,190 |
| ENSOCUG00000002862 | RPS15    | -0,24 | -0,240 |
| ENSOCUG00000002739 | PAIP1    | -0,24 | -0,442 |
| ENSOCUG00000003228 | CLK4     | -0,24 | -0,349 |
| ENSOCUG00000004185 | FNDC3B   | -0,24 | -0,184 |
| ENSOCUG00000017384 | NEMF     | -0,24 | -0,216 |
| ENSOCUG00000012424 | CMPK1    | -0,24 | -0,404 |
| ENSOCUG00000000481 | EIF2S2   | -0,25 | -0,568 |
| ENSOCUG00000007093 | IPO7     | -0,25 | -0,445 |
| ENSOCUG00000010034 | CHD7     | -0,25 | -0,432 |
| ENSOCUG00000000991 | HIF1AN   | -0,25 | -0,456 |
| ENSOCUG00000013831 | TMOD1    | -0,25 | -0,447 |
| ENSOCUG00000013922 | PSMD12   | -0,25 | -0,361 |
| ENSOCUG00000007579 | ATRX     | -0,25 | -0,266 |
| ENSOCUG00000008167 | CALU     | -0,25 | -0,273 |
| ENSOCUG00000025313 | PSMD6    | -0,25 | -0,448 |
| ENSOCUG00000004759 | GSPT1    | -0,25 | -0,237 |
| ENSOCUG00000003627 | GPSM2    | -0,25 | -0,297 |
| ENSOCUG00000010029 | GRSF1    | -0,25 | -0,386 |
| ENSOCUG00000027344 | CSF2RB   | -0,25 | -0,235 |
| ENSOCUG00000013706 | KIF16B   | -0,25 | -0,267 |
| ENSOCUG00000005543 | ZNF292   | -0,25 | -0,145 |
| ENSOCUG00000029303 | RAP1A    | -0,25 | -0,244 |
| ENSOCUG00000029421 | SNX6     | -0,25 | -0,357 |
| ENSOCUG00000004900 | PALLD    | -0,26 | -0,297 |
| ENSOCUG00000016209 | CALCOCO2 | -0,26 | -0,145 |
| ENSOCUG00000013243 | SMC5     | -0,26 | -0,277 |
| ENSOCUG00000027088 | PPP2R2A  | -0,26 | -0,279 |
| ENSOCUG00000005324 | MAP1A    | -0,26 | -0,275 |
| ENSOCUG00000006625 | ACADL    | -0,26 | -0,705 |
| ENSOCUG00000005116 | PIK3R1   | -0,26 | -0,293 |
| ENSOCUG00000010453 | MLIP     | -0,26 | -0,707 |
| ENSOCUG00000015866 | BPTF     | -0,26 | -0,233 |
| ENSOCUG00000002533 | KCMF1    | -0,26 | -0,404 |
| ENSOCUG00000002827 | IDE      | -0,26 | -0,461 |
| ENSOCUG00000011168 | TMEM87A  | -0,26 | -0,193 |

|                    |         |       |        |
|--------------------|---------|-------|--------|
| ENSOCUG0000006039  | KAT2B   | -0,26 | -0,418 |
| ENSOCUG00000010015 | RUFY3   | -0,26 | -0,249 |
| ENSOCUG00000010587 | APP     | -0,26 | -0,365 |
| ENSOCUG00000016503 | WAPL    | -0,26 | -0,243 |
| ENSOCUG00000011034 | STAT3   | -0,26 | -0,264 |
| ENSOCUG00000013563 | EHBP1   | -0,27 | -0,319 |
| ENSOCUG00000016614 | NDEL1   | -0,27 | -0,322 |
| ENSOCUG00000011647 | FOXJ3   | -0,27 | -0,188 |
| ENSOCUG00000025540 | NFYC    | -0,27 | -0,305 |
| ENSOCUG00000005685 | TRIP11  | -0,27 | -0,351 |
| ENSOCUG00000016438 | CSDE1   | -0,27 | -0,368 |
| ENSOCUG00000015650 | TBC1D15 | -0,27 | -0,313 |
| ENSOCUG00000009420 | NLN     | -0,28 | -0,452 |
| ENSOCUG00000002549 | WDR1    | -0,28 | -0,294 |
| ENSOCUG00000004534 | MDN1    | -0,28 | -0,206 |
| ENSOCUG00000010440 | MSI2    | -0,28 | -0,384 |
| ENSOCUG00000007010 | DDX1    | -0,28 | -0,436 |
| ENSOCUG00000013484 | EIF4B   | -0,28 | -0,344 |
| ENSOCUG00000008790 | KMT2E   | -0,28 | -0,261 |
| ENSOCUG00000003373 | ATE1    | -0,28 | -0,356 |
| ENSOCUG00000012226 | SRP72   | -0,28 | -0,250 |
| ENSOCUG00000006227 | JAK1    | -0,28 | -0,265 |
| ENSOCUG00000007752 | SIL1    | -0,28 | -0,392 |
| ENSOCUG00000003962 | PHLDB2  | -0,28 | -0,498 |
| ENSOCUG00000010949 | ZCCHC6  | -0,28 | -0,253 |
| ENSOCUG00000005143 | PSMD4   | -0,28 | -0,415 |
| ENSOCUG00000014895 | NUCKS1  | -0,29 | -0,230 |
| ENSOCUG00000008154 | TMF1    | -0,29 | -0,332 |
| ENSOCUG00000009944 | DYNC112 | -0,29 | -0,291 |
| ENSOCUG00000004657 | NR2C1   | -0,29 | -0,517 |
| ENSOCUG00000004434 | CHD1    | -0,29 | -0,324 |
| ENSOCUG00000012152 | MCL1    | -0,29 | -0,236 |
| ENSOCUG00000009841 | GNL3    | -0,29 | -0,394 |
| ENSOCUG00000003980 | TMX1    | -0,29 | -0,473 |
| ENSOCUG00000027423 | RPS29   | -0,29 | -0,282 |
| ENSOCUG00000010324 | KDM3A   | -0,30 | -0,286 |
| ENSOCUG00000002190 | MITF    | -0,30 | -0,701 |
| ENSOCUG00000015520 | PHF3    | -0,30 | -0,333 |
| ENSOCUG00000004325 | TNRC6A  | -0,30 | -0,302 |
| ENSOCUG00000010396 | SSB     | -0,30 | -0,419 |
| ENSOCUG00000006799 | COQ6    | -0,30 | -0,890 |
| ENSOCUG00000014299 | TPP2    | -0,30 | -0,320 |
| ENSOCUG00000001972 | TXNDC12 | -0,30 | -0,328 |
| ENSOCUG00000023433 | ITSN2   | -0,30 | -0,341 |
| ENSOCUG00000014360 | VPS45   | -0,30 | -0,676 |

|                    |           |       |        |
|--------------------|-----------|-------|--------|
| ENSOCUG00000009755 | JARID2    | -0,30 | -0,352 |
| ENSOCUG00000004237 | NDUFA2    | -0,30 | -0,619 |
| ENSOCUG00000003617 | MTIF2     | -0,30 | -0,446 |
| ENSOCUG00000024656 | SLC8A1    | -0,30 | -0,568 |
| ENSOCUG00000023878 | SYNE1     | -0,30 | -0,258 |
| ENSOCUG00000013221 | EGLN1     | -0,30 | -0,707 |
| ENSOCUG00000029277 | CHMP3     | -0,30 | -0,384 |
| ENSOCUG00000015651 | ATG3      | -0,30 | -0,265 |
| ENSOCUG00000004316 | NRBP1     | -0,30 | -0,216 |
| ENSOCUG00000012136 | TBK1      | -0,31 | -0,329 |
| ENSOCUG00000001837 | SRSF4     | -0,31 | -0,503 |
| ENSOCUG00000002928 | ERC1      | -0,31 | -0,481 |
| ENSOCUG00000013170 | MARCH1    | -0,31 | -0,326 |
| ENSOCUG00000022307 | RAB18     | -0,31 | -0,317 |
| ENSOCUG00000007139 | FAM149B1  | -0,31 | -0,350 |
| ENSOCUG00000015438 | MIER1     | -0,31 | -0,242 |
| ENSOCUG00000003409 | COPS4     | -0,31 | -0,589 |
| ENSOCUG00000008328 | INTS13    | -0,31 | -0,394 |
| ENSOCUG00000016393 | RB1CC1    | -0,31 | -0,446 |
| ENSOCUG00000003964 | TMED4     | -0,31 | -0,334 |
| ENSOCUG00000013505 | CPSF6     | -0,31 | -0,222 |
| ENSOCUG00000009197 | DCAF13    | -0,31 | -0,247 |
| ENSOCUG00000017370 | FRMD4A    | -0,31 | -0,410 |
| ENSOCUG00000016875 | GATB      | -0,31 | -0,566 |
| ENSOCUG00000015914 | PRRC2C    | -0,31 | -0,349 |
| ENSOCUG00000026707 | TRIM23    | -0,32 | -0,241 |
| ENSOCUG00000015950 | ARHGAP12  | -0,32 | -0,221 |
| ENSOCUG00000002037 | PTPN21    | -0,32 | -0,261 |
| ENSOCUG00000029239 | ZNF717    | -0,32 | -0,373 |
| ENSOCUG00000002756 | CHTOP     | -0,32 | -0,420 |
| ENSOCUG00000012564 | EIF3K     | -0,32 | -0,264 |
| ENSOCUG00000003439 | DAG1      | -0,32 | -0,410 |
| ENSOCUG00000009067 | DHX38     | -0,32 | -0,329 |
| ENSOCUG00000015847 | CSPP1     | -0,32 | -0,309 |
| ENSOCUG00000006979 | HDHD2     | -0,32 | -0,596 |
| ENSOCUG00000025582 | LDB1      | -0,32 | -0,303 |
| ENSOCUG00000016511 | PARK7     | -0,32 | -0,472 |
| ENSOCUG00000004806 | PCNT      | -0,32 | -0,282 |
| ENSOCUG00000013277 | TET1      | -0,32 | -0,287 |
| ENSOCUG00000015425 | KPNB1     | -0,32 | -0,388 |
| ENSOCUG00000008180 | MAP4K4    | -0,32 | -0,269 |
| ENSOCUG00000004000 | EIF4ENIF1 | -0,32 | -0,361 |
| ENSOCUG00000006879 | EFTUD2    | -0,32 | -0,234 |
| ENSOCUG00000013435 | SNX2      | -0,32 | -0,329 |
| ENSOCUG00000006016 | SMS       | -0,32 | -0,413 |

|                    |          |       |        |
|--------------------|----------|-------|--------|
| ENSOCUG00000016382 | ZNF106   | -0,32 | -0,658 |
| ENSOCUG00000006320 | SMARCA2  | -0,32 | -0,407 |
| ENSOCUG00000013237 | AASS     | -0,32 | -0,386 |
| ENSOCUG00000004961 | CELF2    | -0,32 | -0,368 |
| ENSOCUG00000014670 | EI24     | -0,33 | -0,472 |
| ENSOCUG00000015150 | BAZ2B    | -0,33 | -0,191 |
| ENSOCUG00000016125 | PTPRM    | -0,33 | -0,215 |
| ENSOCUG00000015916 | PIP4K2B  | -0,33 | -0,310 |
| ENSOCUG00000011730 | RYBP     | -0,33 | -0,352 |
| ENSOCUG00000002197 | ITGB8    | -0,33 | -0,415 |
| ENSOCUG00000005932 | CCDC93   | -0,33 | -0,266 |
| ENSOCUG00000009309 | GALC     | -0,33 | -0,476 |
| ENSOCUG00000002181 | MDC1     | -0,33 | -0,294 |
| ENSOCUG00000007408 | GNL3L    | -0,33 | -0,252 |
| ENSOCUG00000014786 | INO80D   | -0,33 | -0,318 |
| ENSOCUG00000002160 | C6orf136 | -0,33 | -0,338 |
| ENSOCUG00000011003 | DNAJC11  | -0,33 | -0,487 |
| ENSOCUG00000005508 | CCDC6    | -0,33 | -0,265 |
| ENSOCUG00000009901 | WDR60    | -0,33 | -0,400 |
| ENSOCUG00000004747 | ANTXR2   | -0,33 | -0,344 |
| ENSOCUG00000006074 | TLK2     | -0,33 | -0,308 |
| ENSOCUG00000016534 | TMEM126A | -0,34 | -0,749 |
| ENSOCUG00000000572 | FAM192A  | -0,34 | -0,306 |
| ENSOCUG00000007656 | TEC      | -0,34 | -0,817 |
| ENSOCUG00000029308 | RAB10    | -0,34 | -0,324 |
| ENSOCUG00000007779 | USP16    | -0,34 | -0,382 |
| ENSOCUG00000000278 | RTF1     | -0,34 | -0,454 |
| ENSOCUG00000001827 | TMEM57   | -0,34 | -0,496 |
| ENSOCUG00000006874 | CFAP36   | -0,34 | -0,315 |
| ENSOCUG00000010580 | ELF1     | -0,34 | -0,355 |
| ENSOCUG00000000466 | MIOS     | -0,34 | -0,448 |
| ENSOCUG00000009041 | BOD1L1   | -0,34 | -0,355 |
| ENSOCUG00000008962 | LNPK     | -0,34 | -0,377 |
| ENSOCUG00000003747 | ZNF384   | -0,34 | -0,342 |
| ENSOCUG00000001357 | HNRNPD   | -0,34 | -0,336 |
| ENSOCUG00000004832 | USP47    | -0,34 | -0,416 |
| ENSOCUG00000025001 | RAD50    | -0,34 | -0,384 |
| ENSOCUG00000005385 | ZFP91    | -0,34 | -0,372 |
| ENSOCUG00000003262 | G3BP2    | -0,35 | -0,396 |
| ENSOCUG00000013244 | CCDC66   | -0,35 | -0,298 |
| ENSOCUG00000008457 | NDUFAB1  | -0,35 | -0,942 |
| ENSOCUG00000016919 | CEP83    | -0,35 | -0,377 |
| ENSOCUG00000001266 | TOMM70   | -0,35 | -0,536 |
| ENSOCUG00000004136 | SEPT7    | -0,35 | -0,419 |
| ENSOCUG00000008074 | MAT2B    | -0,35 | -0,333 |

|                    |           |       |        |
|--------------------|-----------|-------|--------|
| ENSOCUG00000010405 | METTL5    | -0,35 | -0,612 |
| ENSOCUG00000010697 | TAF5L     | -0,35 | -0,398 |
| ENSOCUG00000015514 | TOR1AIP1  | -0,35 | -0,315 |
| ENSOCUG00000001052 | ARID4A    | -0,35 | -0,351 |
| ENSOCUG00000008948 | CHMP5     | -0,35 | -0,316 |
| ENSOCUG00000014396 | ZNF532    | -0,35 | -0,192 |
| ENSOCUG00000012972 | CRYAB     | -0,35 | -0,972 |
| ENSOCUG00000017820 | PARP1     | -0,35 | -0,521 |
| ENSOCUG00000013906 | CWC25     | -0,36 | -0,391 |
| ENSOCUG00000010117 | SARNP     | -0,36 | -0,440 |
| ENSOCUG00000000359 | CLK2      | -0,36 | -0,292 |
| ENSOCUG00000013109 | PSMB5     | -0,36 | -0,588 |
| ENSOCUG00000010309 | RPL14     | -0,36 | -0,288 |
| ENSOCUG00000002251 | RCSD1     | -0,36 | -0,425 |
| ENSOCUG00000017849 | GCC2      | -0,36 | -0,255 |
| ENSOCUG00000006079 | BAZ2A     | -0,36 | -0,176 |
| ENSOCUG00000000303 | PPP1R3A   | -0,36 | -0,930 |
| ENSOCUG00000007051 | SUDS3     | -0,36 | -0,346 |
| ENSOCUG00000015462 | PRRG1     | -0,36 | -0,761 |
| ENSOCUG00000008137 | MLLT3     | -0,36 | -0,501 |
| ENSOCUG00000013239 | PRPF40A   | -0,36 | -0,376 |
| ENSOCUG00000009241 | RAB11FIP2 | -0,36 | -0,395 |
| ENSOCUG00000013372 | RRM1      | -0,36 | -0,248 |
| ENSOCUG00000015936 | GSAP      | -0,36 | -0,286 |
| ENSOCUG00000022928 | RPL11     | -0,36 | -0,420 |
| ENSOCUG00000004566 | DBI       | -0,36 | -0,410 |
| ENSOCUG00000007963 | C2orf49   | -0,36 | -0,288 |
| ENSOCUG00000012638 | PSMC6     | -0,36 | -0,353 |
| ENSOCUG00000006589 | KIAA1551  | -0,36 | -0,305 |
| ENSOCUG00000001414 | DDX23     | -0,37 | -0,327 |
| ENSOCUG00000006235 | PPP4R2    | -0,37 | -0,492 |
| ENSOCUG00000014667 | DLD       | -0,37 | -0,687 |
| ENSOCUG00000015494 | NIN       | -0,37 | -0,342 |
| ENSOCUG00000027456 | DSTN      | -0,37 | -0,489 |
| ENSOCUG00000006642 | XRCC5     | -0,37 | -0,293 |
| ENSOCUG00000007640 | GNA13     | -0,37 | -0,418 |
| ENSOCUG00000017344 | KAT6B     | -0,37 | -0,442 |
| ENSOCUG00000013737 | RBM25     | -0,37 | -0,315 |
| ENSOCUG00000017416 | FAM136A   | -0,37 | -0,599 |
| ENSOCUG00000004532 | THRБ      | -0,37 | -0,566 |
| ENSOCUG00000009259 | AARSD1    | -0,37 | -0,326 |
| ENSOCUG00000005372 | TNIP1     | -0,37 | -0,218 |
| ENSOCUG00000008342 | FGFR1OP2  | -0,37 | -0,333 |
| ENSOCUG00000012716 | SAP18     | -0,37 | -0,484 |
| ENSOCUG00000012206 | DDX46     | -0,37 | -0,375 |



|                     |          |       |        |
|---------------------|----------|-------|--------|
| ENSOCUG00000000038  | CREBRF   | -0,37 | -0,269 |
| ENSOCUG00000002555  | SCP2     | -0,37 | -0,497 |
| ENSOCUG00000001320  | IFT74    | -0,37 | -0,319 |
| ENSOCUG000000027851 | PARG     | -0,37 | -0,361 |
| ENSOCUG000000016747 | PSMF1    | -0,37 | -0,517 |
| ENSOCUG000000026553 | PSMD8    | -0,38 | -0,361 |
| ENSOCUG00000000586  | VT11B    | -0,38 | -0,415 |
| ENSOCUG000000013254 | IFNGR1   | -0,38 | -0,390 |
| ENSOCUG00000003035  | SLK      | -0,38 | -0,384 |
| ENSOCUG00000004848  | ROCK1    | -0,38 | -0,526 |
| ENSOCUG000000027940 | HSPA4L   | -0,38 | -0,400 |
| ENSOCUG000000008397 | CTSV     | -0,38 | -0,390 |
| ENSOCUG000000003169 | LRRFIP2  | -0,38 | -0,694 |
| ENSOCUG00000001645  | RAB7A    | -0,38 | -0,479 |
| ENSOCUG00000001165  | RANBP2   | -0,38 | -0,389 |
| ENSOCUG000000014543 | CHMP4B   | -0,38 | -0,524 |
| ENSOCUG00000001758  | PTPN2    | -0,39 | -0,547 |
| ENSOCUG000000015244 | PHYH     | -0,39 | -0,625 |
| ENSOCUG00000000618  | PIAS1    | -0,39 | -0,286 |
| ENSOCUG000000017493 | KIF5B    | -0,39 | -0,633 |
| ENSOCUG000000006541 | ZFP62    | -0,39 | -0,338 |
| ENSOCUG000000017823 | M6PR     | -0,39 | -0,287 |
| ENSOCUG000000016737 | ZFR      | -0,39 | -0,383 |
| ENSOCUG000000004462 | PCF11    | -0,39 | -0,334 |
| ENSOCUG000000006169 | TCERG1   | -0,39 | -0,414 |
| ENSOCUG000000006605 | ARID4B   | -0,39 | -0,337 |
| ENSOCUG000000023965 | SSBP1    | -0,39 | -0,598 |
| ENSOCUG000000015612 | NOL11    | -0,39 | -0,548 |
| ENSOCUG000000000429 | MPHOSPH8 | -0,39 | -0,412 |
| ENSOCUG000000008592 | AHCY     | -0,39 | -0,356 |
| ENSOCUG000000014607 | YWHAE    | -0,39 | -0,454 |
| ENSOCUG000000004338 | TJP1     | -0,40 | -0,475 |
| ENSOCUG000000011248 | C6orf203 | -0,40 | -0,664 |
| ENSOCUG00000001776  | REST     | -0,40 | -0,421 |
| ENSOCUG000000017050 | NFS1     | -0,40 | -0,574 |
| ENSOCUG000000003009 | RBM28    | -0,40 | -0,464 |
| ENSOCUG000000015547 | LIMCH1   | -0,40 | -0,319 |
| ENSOCUG000000009924 | CCDC25   | -0,40 | -0,376 |
| ENSOCUG000000009613 | NKAP     | -0,40 | -0,443 |
| ENSOCUG000000004419 | NDUFC1   | -0,40 | -0,777 |
| ENSOCUG000000005409 | GOLIM4   | -0,40 | -0,490 |
| ENSOCUG000000014580 | ZNF330   | -0,40 | -0,529 |
| ENSOCUG000000011084 | PPIG     | -0,40 | -0,378 |
| ENSOCUG000000024139 | TRA2A    | -0,40 | -0,314 |
| ENSOCUG00000002954  | CASC3    | -0,40 | -0,395 |

|                    |          |       |        |
|--------------------|----------|-------|--------|
| ENSOCUG00000010593 | UQCC1    | -0,40 | -0,678 |
| ENSOCUG00000002353 | TRNAU1AP | -0,40 | -0,553 |
| ENSOCUG00000014469 | HNRNPU   | -0,40 | -0,364 |
| ENSOCUG00000002132 | PPP1R10  | -0,41 | -0,375 |
| ENSOCUG00000023943 | UBAP2L   | -0,41 | -0,378 |
| ENSOCUG00000017519 | MYO10    | -0,41 | -0,576 |
| ENSOCUG00000003025 | NARS     | -0,41 | -0,520 |
| ENSOCUG00000012291 | ZNF326   | -0,41 | -0,397 |
| ENSOCUG00000029509 | C16orf52 | -0,41 | -0,522 |
| ENSOCUG00000000095 | RBBP5    | -0,41 | -0,371 |
| ENSOCUG00000009934 | DYRK2    | -0,41 | -0,372 |
| ENSOCUG00000003793 | ANAPC13  | -0,41 | -0,748 |
| ENSOCUG00000000023 | PKP2     | -0,41 | -0,715 |
| ENSOCUG00000010114 | BLOC1S1  | -0,41 | -0,447 |
| ENSOCUG00000004082 | TUBA1B   | -0,41 | -0,401 |
| ENSOCUG00000008901 | NAGK     | -0,41 | -0,443 |
| ENSOCUG00000002031 | AGA      | -0,41 | -0,298 |
| ENSOCUG00000000367 | DROSHA   | -0,41 | -0,271 |
| ENSOCUG00000016958 | PCMTD1   | -0,41 | -0,439 |
| ENSOCUG00000009556 | SRFBP1   | -0,41 | -0,493 |
| ENSOCUG00000009231 | OXCT1    | -0,41 | -0,923 |
| ENSOCUG00000005226 | ZNF143   | -0,42 | -0,464 |
| ENSOCUG00000015484 | CRNKL1   | -0,42 | -0,462 |
| ENSOCUG00000004463 | SKIV2L2  | -0,42 | -0,312 |
| ENSOCUG00000014319 | PIK3R3   | -0,42 | -0,656 |
| ENSOCUG00000002913 | BCORL1   | -0,42 | -0,241 |
| ENSOCUG00000012289 | MTAP     | -0,42 | -0,552 |
| ENSOCUG00000017307 | SMC6     | -0,42 | -0,381 |
| ENSOCUG00000001513 | VPS26A   | -0,42 | -0,439 |
| ENSOCUG00000011427 | MAPKAPK5 | -0,42 | -0,422 |
| ENSOCUG00000002053 | DNAJB11  | -0,42 | -0,374 |
| ENSOCUG00000002551 | CNTLN    | -0,42 | -0,598 |
| ENSOCUG00000025605 | CYCS     | -0,42 | -0,872 |
| ENSOCUG00000005294 | RRAGD    | -0,42 | -0,781 |
| ENSOCUG00000008893 | EMC7     | -0,42 | -0,404 |
| ENSOCUG00000005695 | PIGK     | -0,42 | -0,508 |
| ENSOCUG00000027528 | PHACTR4  | -0,42 | -0,483 |
| ENSOCUG00000006124 | LNP1     | -0,42 | -1,227 |
| ENSOCUG00000011923 | RSF1     | -0,43 | -0,406 |
| ENSOCUG00000007802 | CAST     | -0,43 | -0,525 |
| ENSOCUG00000015417 | CSTF3    | -0,43 | -0,417 |
| ENSOCUG00000010197 | PHAX     | -0,43 | -0,525 |
| ENSOCUG00000003399 | HMG3     | -0,43 | -0,508 |
| ENSOCUG00000002805 | AMPD3    | -0,43 | -0,520 |
| ENSOCUG00000000249 | SMARCD3  | -0,43 | -0,349 |

|                    |          |       |        |
|--------------------|----------|-------|--------|
| ENSOCUG00000010172 | RALBP1   | -0,43 | -0,325 |
| ENSOCUG00000025756 | CXXC1    | -0,43 | -0,353 |
| ENSOCUG00000014983 | PPFIBP2  | -0,43 | -0,455 |
| ENSOCUG00000026649 | SMN1     | -0,43 | -0,509 |
| ENSOCUG00000013924 | OTUD7B   | -0,43 | -0,572 |
| ENSOCUG00000008720 | SEC62    | -0,43 | -0,316 |
| ENSOCUG00000021080 | MBD2     | -0,43 | -0,312 |
| ENSOCUG00000007692 | JPH1     | -0,43 | -0,729 |
| ENSOCUG00000004524 | AKAP9    | -0,43 | -0,443 |
| ENSOCUG00000025617 | CDH13    | -0,43 | -0,716 |
| ENSOCUG00000004613 | LRRC59   | -0,43 | -0,515 |
| ENSOCUG00000013054 | UBE2H    | -0,43 | -0,474 |
| ENSOCUG00000024862 | C6orf106 | -0,43 | -0,667 |
| ENSOCUG00000006171 | MINDY2   | -0,43 | -0,404 |
| ENSOCUG00000017871 | ACTN2    | -0,44 | -1,099 |
| ENSOCUG00000005420 | BMI1     | -0,44 | -0,440 |
| ENSOCUG00000029298 | CIR1     | -0,44 | -0,407 |
| ENSOCUG00000017804 | ZNF131   | -0,44 | -0,321 |
| ENSOCUG00000009618 | SLAIN2   | -0,44 | -0,473 |
| ENSOCUG00000007468 | CCPG1    | -0,44 | -0,464 |
| ENSOCUG00000000562 | PABPC4   | -0,44 | -0,501 |
| ENSOCUG00000014796 | HERC1    | -0,44 | -0,387 |
| ENSOCUG00000008444 | UBFD1    | -0,44 | -0,533 |
| ENSOCUG00000017662 | TERF2    | -0,44 | -0,360 |
| ENSOCUG00000008215 | CHD4     | -0,44 | -0,478 |
| ENSOCUG00000002214 | GLOD4    | -0,44 | -0,445 |
| ENSOCUG00000016112 | METTL16  | -0,45 | -0,381 |
| ENSOCUG00000012019 | RNF20    | -0,45 | -0,329 |
| ENSOCUG00000006110 | EIF4G1   | -0,45 | -0,518 |
| ENSOCUG00000001349 | RBFOX2   | -0,45 | -0,399 |
| ENSOCUG00000000776 | LEMD3    | -0,45 | -0,400 |
| ENSOCUG00000000408 | PDK1     | -0,45 | -0,813 |
| ENSOCUG00000000848 | SUPT6H   | -0,45 | -0,457 |
| ENSOCUG00000016332 | CDC73    | -0,45 | -0,407 |
| ENSOCUG00000023518 | FXR1     | -0,45 | -0,706 |
| ENSOCUG00000008361 | HSPA4    | -0,45 | -0,555 |
| ENSOCUG00000003818 | TRIM44   | -0,45 | -0,404 |
| ENSOCUG00000016697 | MRPS10   | -0,45 | -0,495 |
| ENSOCUG00000001949 | MRPL15   | -0,45 | -0,671 |
| ENSOCUG00000017534 | FNBP4    | -0,45 | -0,388 |
| ENSOCUG00000024211 | JRKL     | -0,46 | -0,375 |
| ENSOCUG00000004930 | RC3H1    | -0,46 | -0,443 |
| ENSOCUG00000016822 | PDCD4    | -0,46 | -0,412 |
| ENSOCUG00000008913 | RPS6KA5  | -0,46 | -0,603 |
| ENSOCUG00000002965 | ZNF652   | -0,46 | -0,325 |

|                    |          |       |        |
|--------------------|----------|-------|--------|
| ENSOCUG00000009081 | SS18     | -0,46 | -0,391 |
| ENSOCUG00000003420 | SAMD4A   | -0,46 | -0,378 |
| ENSOCUG00000003327 | SLTM     | -0,46 | -0,439 |
| ENSOCUG00000000668 | KAT7     | -0,46 | -0,430 |
| ENSOCUG00000017375 | SMARCC2  | -0,46 | -0,321 |
| ENSOCUG00000015521 | CACUL1   | -0,46 | -0,430 |
| ENSOCUG00000001963 | TNS1     | -0,46 | -0,422 |
| ENSOCUG00000011375 | WDR33    | -0,46 | -0,424 |
| ENSOCUG00000011175 | ZNF445   | -0,47 | -0,460 |
| ENSOCUG00000001119 | MRPS22   | -0,47 | -0,701 |
| ENSOCUG00000010650 | KTN1     | -0,47 | -0,516 |
| ENSOCUG00000015680 | PPHLN1   | -0,47 | -0,433 |
| ENSOCUG00000001407 | MAGI2    | -0,47 | -0,398 |
| ENSOCUG00000001002 | ZCCHC7   | -0,47 | -0,484 |
| ENSOCUG00000008247 | TPD52    | -0,47 | -0,440 |
| ENSOCUG00000004712 | GABPB2   | -0,47 | -0,540 |
| ENSOCUG00000010866 | HSD17B4  | -0,47 | -0,461 |
| ENSOCUG00000002316 | RPAP3    | -0,47 | -0,637 |
| ENSOCUG00000017124 | ASB15    | -0,47 | -0,954 |
| ENSOCUG00000012441 | PCGF6    | -0,47 | -0,742 |
| ENSOCUG00000001751 | RND3     | -0,47 | -0,483 |
| ENSOCUG00000002099 | MADD     | -0,47 | -0,611 |
| ENSOCUG00000023231 | MRPS16   | -0,47 | -0,729 |
| ENSOCUG00000015797 | TSPYL1   | -0,48 | -0,679 |
| ENSOCUG00000012593 | BAZ1A    | -0,48 | -0,630 |
| ENSOCUG00000012366 | SLC25A46 | -0,48 | -0,652 |
| ENSOCUG00000017230 | PCCA     | -0,48 | -0,776 |
| ENSOCUG00000009645 | SAT1     | -0,48 | -0,550 |
| ENSOCUG00000007031 | GRHPR    | -0,48 | -0,484 |
| ENSOCUG00000000582 | ARL2BP   | -0,48 | -0,360 |
| ENSOCUG00000016784 | BCAS2    | -0,48 | -0,706 |
| ENSOCUG00000005425 | SNAPIN   | -0,48 | -0,679 |
| ENSOCUG00000002577 | LRIF1    | -0,48 | -0,490 |
| ENSOCUG00000008045 | NCBP3    | -0,48 | -0,566 |
| ENSOCUG00000000386 | RCAN3    | -0,48 | -0,432 |
| ENSOCUG00000005026 | CD2AP    | -0,48 | -0,433 |
| ENSOCUG00000014256 | TSR1     | -0,48 | -0,547 |
| ENSOCUG00000008316 | STRIP2   | -0,48 | -0,754 |
| ENSOCUG00000029448 | UBE2D2   | -0,48 | -0,660 |
| ENSOCUG00000009681 | GSTMYb-3 | -0,48 | -0,376 |
| ENSOCUG00000005263 | TOX      | -0,48 | -0,838 |
| ENSOCUG00000013643 | PDLIM1   | -0,48 | -0,343 |
| ENSOCUG00000012092 | PSMA2    | -0,48 | -0,723 |
| ENSOCUG00000004117 | QKI      | -0,48 | -0,607 |
| ENSOCUG00000011283 | NUDT4    | -0,48 | -0,528 |

|                    |          |       |        |
|--------------------|----------|-------|--------|
| ENSOCUG00000012324 | ALPK2    | -0,49 | -0,977 |
| ENSOCUG00000002296 | GCOM1    | -0,49 | -0,794 |
| ENSOCUG00000026893 | C1orf115 | -0,49 | -0,769 |
| ENSOCUG00000017403 | TATDN1   | -0,49 | -0,398 |
| ENSOCUG00000015767 | OTUD5    | -0,49 | -0,304 |
| ENSOCUG00000001078 | AMOTL1   | -0,49 | -0,253 |
| ENSOCUG00000011418 | STRN3    | -0,49 | -0,557 |
| ENSOCUG00000000186 | RBM27    | -0,49 | -0,523 |
| ENSOCUG00000002782 | LMAN2    | -0,49 | -0,483 |
| ENSOCUG00000012745 | NSFL1C   | -0,49 | -0,617 |
| ENSOCUG00000014425 | FILIP1L  | -0,49 | -0,515 |
| ENSOCUG00000015730 | TAOK1    | -0,49 | -0,530 |
| ENSOCUG00000001217 | MARCH7   | -0,49 | -0,433 |
| ENSOCUG00000003124 | ARHGAP10 | -0,49 | -0,496 |
| ENSOCUG00000005657 | C1orf131 | -0,50 | -0,518 |
| ENSOCUG00000000852 | CCDC181  | -0,50 | -0,742 |
| ENSOCUG00000015563 | TERF2IP  | -0,50 | -0,420 |
| ENSOCUG00000023887 | CD55     | -0,50 | -0,665 |
| ENSOCUG00000014232 | CLINT1   | -0,50 | -0,518 |
| ENSOCUG00000014998 | IL36A    | -0,50 | -0,459 |
| ENSOCUG00000011743 | SLU7     | -0,50 | -0,370 |
| ENSOCUG00000004244 | KLF12    | -0,50 | -0,389 |
| ENSOCUG00000015489 | ARPP19   | -0,50 | -0,659 |
| ENSOCUG00000011526 | AADAT    | -0,50 | -0,553 |
| ENSOCUG00000000601 | SYNCRIP  | -0,50 | -0,605 |
| ENSOCUG00000001636 | UTP18    | -0,50 | -0,544 |
| ENSOCUG00000016912 | RMDN3    | -0,50 | -0,805 |
| ENSOCUG00000000290 | PCDH7    | -0,50 | -0,721 |
| ENSOCUG00000002217 | ARL1     | -0,50 | -0,756 |
| ENSOCUG00000011629 | ANKRD17  | -0,50 | -0,542 |
| ENSOCUG00000022457 | MSANTD4  | -0,50 | -0,528 |
| ENSOCUG00000010042 | MAG1     | -0,50 | -0,455 |
| ENSOCUG00000004726 | EBAG9    | -0,50 | -0,760 |
| ENSOCUG00000000897 | PRKAA1   | -0,51 | -0,405 |
| ENSOCUG00000011120 | PURA     | -0,51 | -0,531 |
| ENSOCUG00000004111 | MRPL30   | -0,51 | -0,537 |
| ENSOCUG00000007090 | YWHAH    | -0,51 | -0,758 |
| ENSOCUG00000000987 | PNISR    | -0,51 | -0,439 |
| ENSOCUG00000015051 | PPP1R3C  | -0,51 | -0,944 |
| ENSOCUG00000002121 | ABCF1    | -0,51 | -0,594 |
| ENSOCUG00000016969 | AMMECR1  | -0,51 | -0,455 |
| ENSOCUG00000016820 | RIOK3    | -0,51 | -0,567 |
| ENSOCUG00000006556 | OGFRL1   | -0,51 | -0,471 |
| ENSOCUG00000029397 | ANP32B   | -0,51 | -0,602 |
| ENSOCUG00000012048 | OTULIN   | -0,51 | -0,567 |

|                    |          |       |        |
|--------------------|----------|-------|--------|
| ENSOCUG00000006249 | ZNF280B  | -0,52 | -0,539 |
| ENSOCUG00000013662 | ACADM    | -0,52 | -0,902 |
| ENSOCUG00000011396 | XIRP1    | -0,52 | -0,867 |
| ENSOCUG00000013330 | LARP1B   | -0,52 | -0,692 |
| ENSOCUG00000011993 | RNF214   | -0,52 | -0,562 |
| ENSOCUG00000011792 | RPS27    | -0,52 | -0,559 |
| ENSOCUG00000009038 | FRG1     | -0,52 | -0,425 |
| ENSOCUG00000007073 | LARP7    | -0,52 | -0,581 |
| ENSOCUG00000005927 | ACSM5    | -0,52 | -0,494 |
| ENSOCUG00000022267 | DDAH2    | -0,52 | -0,354 |
| ENSOCUG00000012261 | TPR      | -0,52 | -0,595 |
| ENSOCUG00000017354 | C11orf57 | -0,52 | -0,402 |
| ENSOCUG00000003969 | ABHD10   | -0,52 | -0,826 |
| ENSOCUG00000016225 | ATP5G1   | -0,52 | -0,956 |
| ENSOCUG00000008735 | MAK16    | -0,52 | -0,645 |
| ENSOCUG00000015631 | NPHP1    | -0,52 | -0,485 |
| ENSOCUG00000004653 | METAP2   | -0,52 | -0,636 |
| ENSOCUG00000013317 | HDAC8    | -0,52 | -0,535 |
| ENSOCUG00000028047 | YBX1     | -0,52 | -1,33  |
| ENSOCUG00000003291 | GPATCH8  | -0,52 | -0,498 |
| ENSOCUG00000015886 | YTHDC1   | -0,52 | -0,534 |
| ENSOCUG00000004301 | CCDC47   | -0,52 | -0,597 |
| ENSOCUG00000017817 | AHSA2    | -0,52 | -0,525 |
| ENSOCUG00000000821 | TACC2    | -0,52 | -0,471 |
| ENSOCUG00000016235 | CYB5A    | -0,52 | -0,555 |
| ENSOCUG00000001875 | TSPAN12  | -0,53 | -0,734 |
| ENSOCUG00000005522 | TRIM55   | -0,53 | -1,290 |
| ENSOCUG00000004778 | RABEP1   | -0,53 | -0,714 |
| ENSOCUG00000000906 | ANGPTL3  | -0,53 | -0,633 |
| ENSOCUG00000007585 | ARGLU1   | -0,53 | -0,581 |
| ENSOCUG00000013071 | TMCC1    | -0,53 | -0,453 |
| ENSOCUG00000002581 | RAD21    | -0,53 | -0,739 |
| ENSOCUG00000005046 | PRPF4    | -0,53 | -0,512 |
| ENSOCUG00000020899 | ZBTB47   | -0,53 | -0,399 |
| ENSOCUG00000011142 | SMC3     | -0,53 | -0,476 |
| ENSOCUG00000023806 | CHCHD4   | -0,53 | -0,502 |
| ENSOCUG00000003754 | RUNX1T1  | -0,53 | -0,612 |
| ENSOCUG00000010012 | AK4      | -0,53 | -0,968 |
| ENSOCUG00000002425 | RYR-2    | -0,53 | -1,205 |
| ENSOCUG00000000270 | CAPZA1   | -0,53 | -0,420 |
| ENSOCUG00000013930 | NOC3L    | -0,53 | -0,426 |
| ENSOCUG00000004816 | RAB23    | -0,53 | -0,474 |
| ENSOCUG00000025231 | NASP     | -0,53 | -0,484 |
| ENSOCUG00000009950 | ADK      | -0,53 | -0,850 |
| ENSOCUG00000022967 | SNRNP27  | -0,53 | -0,758 |

|                    |          |       |        |
|--------------------|----------|-------|--------|
| ENSOCUG00000008078 | SPTLC1   | -0,53 | -0,426 |
| ENSOCUG00000028046 | C18orf21 | -0,53 | -0,682 |
| ENSOCUG00000013664 | ZCRB1    | -0,53 | -0,604 |
| ENSOCUG00000017640 | Vps4a    | -0,54 | -0,560 |
| ENSOCUG00000010003 | UTP3     | -0,54 | -0,847 |
| ENSOCUG00000022926 | DNAJC1   | -0,54 | -0,710 |
| ENSOCUG00000014000 | TAF7     | -0,54 | -0,465 |
| ENSOCUG00000013059 | BHLHB9   | -0,54 | -0,539 |
| ENSOCUG00000013066 | LARP1    | -0,54 | -0,501 |
| ENSOCUG00000008933 | ATP5G2   | -0,54 | -0,758 |
| ENSOCUG00000008083 | YLPM1    | -0,54 | -0,497 |
| ENSOCUG00000011903 | ZC3H15   | -0,54 | -0,532 |
| ENSOCUG00000002746 | TWNK     | -0,54 | -0,446 |
| ENSOCUG00000029160 | PUS7     | -0,54 | -0,682 |
| ENSOCUG00000000707 | FAM161A  | -0,54 | -0,684 |
| ENSOCUG00000009319 | PSIP1    | -0,54 | -0,499 |
| ENSOCUG00000013043 | MYEF2    | -0,55 | -0,476 |
| ENSOCUG00000009724 | FAIM     | -0,55 | -0,543 |
| ENSOCUG00000015173 | ZC3H13   | -0,55 | -0,583 |
| ENSOCUG00000006316 | PLEKHO1  | -0,55 | -0,748 |
| ENSOCUG00000014890 | PAH      | -0,55 | -0,830 |
| ENSOCUG00000007968 | ZBTB18   | -0,55 | -0,575 |
| ENSOCUG00000002264 | ADCY10   | -0,55 | -0,498 |
| ENSOCUG00000002949 | CISD1    | -0,55 | -0,839 |
| ENSOCUG00000015635 | PSMA6    | -0,55 | -0,769 |
| ENSOCUG00000012005 | ME3      | -0,55 | -1,140 |
| ENSOCUG00000014267 | RDX      | -0,55 | -0,396 |
| ENSOCUG00000012518 | DSC2     | -0,55 | -0,862 |
| ENSOCUG00000000958 | NDUFC2   | -0,56 | -0,948 |
| ENSOCUG00000016189 | MRPL13   | -0,56 | -0,491 |
| ENSOCUG00000002888 | DDX21    | -0,56 | -0,561 |
| ENSOCUG00000006153 | PSPC1    | -0,56 | -0,499 |
| ENSOCUG00000029655 | RNF8     | -0,56 | -0,679 |
| ENSOCUG00000009083 | SSR1     | -0,56 | -0,572 |
| ENSOCUG00000004312 | NCL      | -0,56 | -0,615 |
| ENSOCUG00000015515 | EML5     | -0,56 | -0,722 |
| ENSOCUG00000002573 | UBAP2    | -0,56 | -0,699 |
| ENSOCUG00000012679 | DNAJB4   | -0,56 | -0,960 |
| ENSOCUG00000001390 | GOLGA4   | -0,56 | -0,762 |
| ENSOCUG00000029674 | RPL37    | -0,56 | -0,652 |
| ENSOCUG00000006571 | OTUD3    | -0,56 | -0,508 |
| ENSOCUG00000006340 | MRPL50   | -0,56 | -0,845 |
| ENSOCUG00000016230 | RABGGTB  | -0,57 | -0,649 |
| ENSOCUG00000015141 | ADCY5    | -0,57 | -0,823 |
| ENSOCUG00000007272 | CCDC186  | -0,57 | -0,517 |

|                     |                 |       |        |
|---------------------|-----------------|-------|--------|
| ENSOCUG00000006471  | BEND5           | -0,57 | -0,609 |
| ENSOCUG00000004255  | ZMAT2           | -0,57 | -0,490 |
| ENSOCUG00000006570  | ABRA            | -0,57 | -1,391 |
| ENSOCUG000000021320 | RRBP1           | -0,57 | -0,480 |
| ENSOCUG000000011788 | JTB             | -0,57 | -0,659 |
| ENSOCUG00000007842  | KYAT3           | -0,57 | -0,759 |
| ENSOCUG00000000963  | PRPF38A         | -0,57 | -0,535 |
| ENSOCUG000000015526 | EML4            | -0,57 | -0,478 |
| ENSOCUG000000015379 | SMYD2           | -0,57 | -0,816 |
| ENSOCUG000000014748 | PDHA1           | -0,57 | -1,013 |
| ENSOCUG000000016114 | AFAP1L1         | -0,57 | -0,608 |
| ENSOCUG000000014034 | C3orf38         | -0,57 | -0,712 |
| ENSOCUG00000007550  | MIS18BP1        | -0,57 | -0,585 |
| ENSOCUG000000016259 | DDIT4L          | -0,58 | -0,937 |
| ENSOCUG000000025387 | PALM2-<br>AKAP2 | -0,58 | -0,258 |
| ENSOCUG000000003796 | CEP63           | -0,58 | -0,528 |
| ENSOCUG000000000733 | CBWD1           | -0,58 | -0,578 |
| ENSOCUG000000007463 | CCDC149         | -0,58 | -0,778 |
| ENSOCUG000000009432 | PFDN1           | -0,58 | -0,951 |
| ENSOCUG000000014391 | ACBD3           | -0,58 | -0,571 |
| ENSOCUG000000010807 | SUPT16H         | -0,58 | -0,541 |
| ENSOCUG000000012181 | LEO1            | -0,58 | -0,533 |
| ENSOCUG000000005414 | ESF1            | -0,58 | -0,642 |
| ENSOCUG000000016811 | RBM20           | -0,58 | -0,784 |
| ENSOCUG000000010791 | SRP9            | -0,58 | -0,847 |
| ENSOCUG000000007174 | SATB1           | -0,58 | -0,797 |
| ENSOCUG000000023315 | CTTNBP2NL       | -0,58 | -0,567 |
| ENSOCUG000000008621 | BRPF3           | -0,58 | -0,297 |
| ENSOCUG000000021671 | TBCA            | -0,58 | -0,769 |
| ENSOCUG000000010331 | FAM92A          | -0,58 | -0,780 |
| ENSOCUG000000004700 | CTAGE5          | -0,59 | -0,721 |
| ENSOCUG000000008064 | TRDN            | -0,59 | -1,027 |
| ENSOCUG000000017863 | RPP15           | -0,59 | -0,764 |
| ENSOCUG000000017104 | PPM1G           | -0,59 | -0,683 |
| ENSOCUG000000008441 | TMCO1           | -0,59 | -0,571 |
| ENSOCUG000000014252 | MAPKAPK2        | -0,59 | -0,834 |
| ENSOCUG000000015722 | SF3B2           | -0,59 | -0,288 |
| ENSOCUG000000001337 | PARM1           | -0,59 | -0,901 |
| ENSOCUG000000029504 | SSRP1           | -0,59 | -0,482 |
| ENSOCUG000000004319 | FTSJ3           | -0,59 | -0,710 |
| ENSOCUG000000008212 | DNTTIP2         | -0,59 | -0,623 |
| ENSOCUG000000013941 | CEP250          | -0,60 | -0,577 |
| ENSOCUG000000009550 | AAK1            | -0,60 | -0,580 |
| ENSOCUG000000017931 | DNAJC8          | -0,60 | -0,704 |



|                    |          |       |        |
|--------------------|----------|-------|--------|
| ENSOCUG00000015290 | MYO18A   | -0,60 | -0,605 |
| ENSOCUG00000017824 | CCDC59   | -0,60 | -0,595 |
| ENSOCUG00000000681 | TXLNG    | -0,60 | -0,734 |
| ENSOCUG00000014599 | ZCCHC17  | -0,60 | -0,562 |
| ENSOCUG00000013417 | NAMPT    | -0,60 | -0,694 |
| ENSOCUG00000005896 | INPP4B   | -0,60 | -0,916 |
| ENSOCUG00000012570 | HTATSF1  | -0,60 | -0,649 |
| ENSOCUG00000006960 | C12orf45 | -0,60 | -0,705 |
| ENSOCUG00000003656 | CDH2     | -0,61 | -0,977 |
| ENSOCUG00000008750 | PSMD7    | -0,61 | -0,798 |
| ENSOCUG00000006121 | APLF     | -0,61 | -0,404 |
| ENSOCUG00000005044 | CDC26    | -0,61 | -0,595 |
| ENSOCUG00000008336 | SCAF4    | -0,61 | -0,673 |
| ENSOCUG00000017723 | CAVIN2   | -0,61 | -0,420 |
| ENSOCUG00000023568 | TTC4     | -0,61 | -0,744 |
| ENSOCUG00000011982 | PHACTR1  | -0,61 | -0,634 |
| ENSOCUG00000007428 | SNX27    | -0,61 | -0,410 |
| ENSOCUG00000004206 | NDUFAF1  | -0,61 | -1,080 |
| ENSOCUG00000002176 | PNN      | -0,61 | -0,611 |
| ENSOCUG00000007161 | CTNBL1   | -0,61 | -0,371 |
| ENSOCUG00000001940 | SMARCC1  | -0,62 | -0,769 |
| ENSOCUG00000012012 | PPIB     | -0,62 | -0,734 |
| ENSOCUG00000025693 | RBM8A    | -0,62 | -0,726 |
| ENSOCUG00000010198 | TPM2     | -0,62 | -0,399 |
| ENSOCUG00000005957 | RNF34    | -0,62 | -0,836 |
| ENSOCUG00000005376 | EIF3J    | -0,62 | -0,920 |
| ENSOCUG00000004598 | TNIK     | -0,62 | -0,560 |
| ENSOCUG00000010208 | DNAJC2   | -0,62 | -0,676 |
| ENSOCUG00000006446 | CBR4     | -0,62 | -0,436 |
| ENSOCUG00000003576 | TENM2    | -0,62 | -1,424 |
| ENSOCUG00000004413 | AP1AR    | -0,62 | -0,670 |
| ENSOCUG00000015403 | HTRA2    | -0,62 | -0,429 |
| ENSOCUG00000015992 | BCAR1    | -0,62 | -0,512 |
| ENSOCUG00000005507 | GNA14    | -0,62 | -0,571 |
| ENSOCUG00000013058 | RNF149   | -0,62 | -0,528 |
| ENSOCUG00000012690 | HSPB1    | -0,62 | -0,533 |
| ENSOCUG00000012427 | TMED5    | -0,62 | -0,619 |
| ENSOCUG00000013307 | RAB5C    | -0,62 | -0,476 |
| ENSOCUG00000014521 | C10orf71 | -0,62 | -0,599 |
| ENSOCUG00000007217 | GPATCH11 | -0,63 | -0,562 |
| ENSOCUG00000001286 | HSBP1    | -0,63 | -0,678 |
| ENSOCUG00000013857 | NAP1L1   | -0,63 | -0,647 |
| ENSOCUG00000004640 | ZRANB2   | -0,63 | -0,539 |
| ENSOCUG00000006681 | ATP5J    | -0,63 | -1,121 |
| ENSOCUG00000006785 | PTGR2    | -0,63 | -0,880 |

|                    |           |       |        |
|--------------------|-----------|-------|--------|
| ENSOCUG00000013858 | MRPL18    | -0,63 | -0,982 |
| ENSOCUG00000003475 | EIF4EBP2  | -0,63 | -0,318 |
| ENSOCUG00000005257 | DNAJC21   | -0,63 | -0,798 |
| ENSOCUG00000017094 | SPAG6     | -0,63 | -0,593 |
| ENSOCUG00000024611 | HNRNPM    | -0,63 | -0,604 |
| ENSOCUG00000009268 | RUNDC1    | -0,64 | -0,706 |
| ENSOCUG00000000218 | OTUD6B    | -0,64 | -0,617 |
| ENSOCUG00000017857 | BICD1     | -0,64 | -0,564 |
| ENSOCUG00000015961 | PPP2CA    | -0,64 | -0,782 |
| ENSOCUG00000021720 | RPGR      | -0,64 | -0,494 |
| ENSOCUG00000002952 | UBE2D1    | -0,64 | -0,827 |
| ENSOCUG00000025115 | MPHOSPH10 | -0,64 | -0,595 |
| ENSOCUG00000000179 | RPS15A    | -0,64 | -0,650 |
| ENSOCUG00000029520 | UBE2I     | -0,64 | -0,532 |
| ENSOCUG00000027678 | TSR2      | -0,64 | -1,044 |
| ENSOCUG00000016363 | BCLAF1    | -0,65 | -0,605 |
| ENSOCUG00000003351 | FAM3C     | -0,65 | -0,735 |
| ENSOCUG00000000588 | FAM96B    | -0,65 | -0,729 |
| ENSOCUG00000002299 | ENAH      | -0,65 | -0,351 |
| ENSOCUG00000007299 | FAM172A   | -0,65 | -0,521 |
| ENSOCUG00000025567 | STBD1     | -0,65 | -0,532 |
| ENSOCUG00000014755 | RAB11A    | -0,65 | -0,642 |
| ENSOCUG00000006173 | NOP10     | -0,65 | -0,938 |
| ENSOCUG00000000009 | CLTA      | -0,65 | -0,664 |
| ENSOCUG00000017351 | BLOC1S6   | -0,65 | -0,520 |
| ENSOCUG00000010810 | NENF      | -0,65 | -0,759 |
| ENSOCUG00000023698 | ASB12     | -0,66 | -0,773 |
| ENSOCUG00000014134 | HIRIP3    | -0,66 | -0,808 |
| ENSOCUG00000002086 | PRNP      | -0,66 | -0,595 |
| ENSOCUG00000021154 | EIF5B     | -0,66 | -0,765 |
| ENSOCUG00000014723 | ATG14     | -0,66 | -0,611 |
| ENSOCUG00000000075 | PITPNA    | -0,66 | -0,584 |
| ENSOCUG00000010545 | FRA10AC1  | -0,66 | -0,839 |
| ENSOCUG00000001999 | GOLM1     | -0,66 | -0,550 |
| ENSOCUG00000012854 | FILIP1    | -0,66 | -0,934 |
| ENSOCUG00000001985 | PTER      | -0,66 | -0,715 |
| ENSOCUG00000025398 | CWF19L2   | -0,66 | -0,767 |
| ENSOCUG00000009122 | RAI14     | -0,67 | -0,563 |
| ENSOCUG00000011253 | ZC3H8     | -0,67 | -0,939 |
| ENSOCUG00000003712 | TCEAL9    | -0,67 | -0,450 |
| ENSOCUG00000026668 | SNRPC     | -0,67 | -1,46  |
| ENSOCUG00000006689 | CFDP1     | -0,67 | -0,672 |
| ENSOCUG00000011554 | KIAA2026  | -0,67 | -0,739 |
| ENSOCUG00000013987 | FGF1      | -0,67 | -0,881 |
| ENSOCUG00000003237 | TRIM41    | -0,67 | -0,518 |

|                    |           |       |        |
|--------------------|-----------|-------|--------|
| ENSOCUG0000000473  | ECHS1     | -0,67 | -1,040 |
| ENSOCUG0000001466  | MRPL24    | -0,67 | -0,953 |
| ENSOCUG00000013833 | PPARGC1B  | -0,67 | -0,937 |
| ENSOCUG00000006268 | SH3KBP1   | -0,68 | -1,041 |
| ENSOCUG00000012444 | FBXO40    | -0,68 | -1,234 |
| ENSOCUG00000027324 | TAF3      | -0,68 | -0,703 |
| ENSOCUG00000014043 | DNAJC19   | -0,68 | -0,929 |
| ENSOCUG00000023899 | YPEL3     | -0,68 | -0,601 |
| ENSOCUG00000026261 | FAM222B   | -0,68 | -0,596 |
| ENSOCUG00000012142 | RBM33     | -0,68 | -0,563 |
| ENSOCUG00000029499 | CWC27     | -0,68 | -0,649 |
| ENSOCUG00000010574 | DAXX      | -0,68 | -0,518 |
| ENSOCUG00000029753 | FUNDC1    | -0,68 | -0,711 |
| ENSOCUG00000001919 | SDE2      | -0,68 | -0,950 |
| ENSOCUG00000029154 | IFIT3     | -0,69 | -0,848 |
| ENSOCUG00000014439 | MAX       | -0,69 | -0,674 |
| ENSOCUG00000008755 | COX6C     | -0,69 | -0,985 |
| ENSOCUG00000015457 | FAM98A    | -0,69 | -0,907 |
| ENSOCUG00000029248 | TUBG1     | -0,69 | -0,840 |
| ENSOCUG00000005089 | NDUFB6    | -0,69 | -1,099 |
| ENSOCUG00000016439 | PBX2      | -0,69 | -0,470 |
| ENSOCUG00000001500 | NSMCE1    | -0,69 | -0,534 |
| ENSOCUG00000001571 | LAP3      | -0,69 | -0,728 |
| ENSOCUG00000006172 | RPL26L1   | -0,69 | -0,561 |
| ENSOCUG00000002765 | LUC7L3    | -0,69 | -0,700 |
| ENSOCUG00000012476 | RPS8      | -0,70 | -0,687 |
| ENSOCUG00000013848 | KIZ       | -0,70 | -0,676 |
| ENSOCUG00000000461 | C21orf59  | -0,70 | -0,683 |
| ENSOCUG00000002358 | ARHGAP30  | -0,70 | -0,715 |
| ENSOCUG00000013150 | DSP       | -0,70 | -1,092 |
| ENSOCUG00000007144 | DNAJC9    | -0,70 | -0,578 |
| ENSOCUG00000004854 | IWS1      | -0,70 | -0,809 |
| ENSOCUG00000016834 | GABARAPL1 | -0,70 | -0,574 |
| ENSOCUG00000016255 | CREBL2    | -0,70 | -0,824 |
| ENSOCUG00000008571 | MYOM1     | -0,70 | -1,260 |
| ENSOCUG00000022370 | PAIP2B    | -0,70 | -0,850 |
| ENSOCUG00000016774 | ECHDC2    | -0,70 | -0,701 |
| ENSOCUG00000000205 | COX7B     | -0,70 | -1,162 |
| ENSOCUG00000008274 | PROX1     | -0,70 | -0,662 |
| ENSOCUG00000000358 | DCTN3     | -0,70 | -0,830 |
| ENSOCUG00000006209 | HFE2      | -0,70 | -1,440 |
| ENSOCUG00000024384 | SRP14     | -0,70 | -0,863 |
| ENSOCUG00000000585 | RRAD      | -0,70 | -1,184 |
| ENSOCUG00000010363 | RPS23     | -0,70 | -0,624 |
| ENSOCUG00000001108 | SPAG7     | -0,71 | -0,908 |

|                    |           |       |        |
|--------------------|-----------|-------|--------|
| ENSOCUG00000027756 | Prpf18    | -0,71 | -0,633 |
| ENSOCUG00000002110 | GNL1      | -0,71 | -0,504 |
| ENSOCUG00000021027 | DYNLRB1   | -0,71 | -0,989 |
| ENSOCUG00000004332 | MYRIP     | -0,71 | -0,772 |
| ENSOCUG00000001096 | TAF1D     | -0,71 | -1,19  |
| ENSOCUG00000008946 | SERBP1    | -0,71 | -0,872 |
| ENSOCUG00000007912 | NSMCE3    | -0,71 | -0,765 |
| ENSOCUG00000027347 | RING1     | -0,71 | -0,535 |
| ENSOCUG00000013865 | PLN       | -0,71 | -1,288 |
| ENSOCUG00000004223 | IK        | -0,71 | -0,691 |
| ENSOCUG00000004026 | CEP128    | -0,71 | -0,533 |
| ENSOCUG00000004003 | MAPK1IP1L | -0,72 | -0,465 |
| ENSOCUG00000015788 | GRIPAP1   | -0,72 | -0,687 |
| ENSOCUG00000023276 | MORF4L1   | -0,72 | -0,630 |
| ENSOCUG00000004276 | MTERF3    | -0,72 | -1,305 |
| ENSOCUG00000022509 | DMD       | -0,72 | -1,120 |
| ENSOCUG00000017017 | CARNMT1   | -0,72 | -1,030 |
| ENSOCUG00000000155 | NSRP1     | -0,72 | -0,825 |
| ENSOCUG00000029161 | CCDC91    | -0,72 | -0,624 |
| ENSOCUG00000001496 | STARD7    | -0,73 | -0,736 |
| ENSOCUG00000002001 | Srsf11    | -0,73 | -0,57  |
| ENSOCUG00000000795 | ZFAND5    | -0,73 | -0,619 |
| ENSOCUG00000017886 | MRPL47    | -0,73 | -0,966 |
| ENSOCUG00000017538 | DNAJA3    | -0,73 | -0,990 |
| ENSOCUG00000001469 | PDCL3     | -0,73 | -0,745 |
| ENSOCUG00000008160 | FAM71F1   | -0,74 | -0,664 |
| ENSOCUG00000009848 | EEF1B2    | -0,74 | -0,662 |
| ENSOCUG00000008198 | IFFO1     | -0,74 | -0,531 |
| ENSOCUG00000027067 | SMIM4     | -0,74 | -1,357 |
| ENSOCUG00000027715 | PACSIN3   | -0,74 | -0,849 |
| ENSOCUG00000001678 | ACIN1     | -0,74 | -0,693 |
| ENSOCUG00000013050 | SYF2      | -0,74 | -0,617 |
| ENSOCUG00000005544 | MRPS18A   | -0,74 | -0,624 |
| ENSOCUG00000004298 | NT5C1A    | -0,74 | -0,727 |
| ENSOCUG00000008451 | CCDC174   | -0,74 | -0,630 |
| ENSOCUG00000001319 | SREK1     | -0,74 | -0,719 |
| ENSOCUG00000011696 | BAG3      | -0,74 | -0,766 |
| ENSOCUG00000001454 | NES       | -0,74 | -0,620 |
| ENSOCUG00000017413 | COA6      | -0,74 | -0,837 |
| ENSOCUG00000004256 | WBP4      | -0,75 | -0,557 |
| ENSOCUG00000002112 | MYBPC3    | -0,75 | -1,090 |
| ENSOCUG00000010418 | SAP30     | -0,75 | -0,697 |
| ENSOCUG00000011638 | RBM6      | -0,75 | -0,638 |
| ENSOCUG00000004005 | POLD4     | -0,75 | -0,622 |
| ENSOCUG00000023773 | TPT1      | -0,75 | -0,661 |

|                    |          |       |        |
|--------------------|----------|-------|--------|
| ENSOCUG00000024073 | DUSP26   | -0,75 | -0,652 |
| ENSOCUG00000027275 | TM4SF1   | -0,76 | -0,756 |
| ENSOCUG00000014861 | MAPRE3   | -0,76 | -0,495 |
| ENSOCUG00000024677 | ACTR3    | -0,76 | -1,183 |
| ENSOCUG00000005002 | RNF207   | -0,76 | -0,747 |
| ENSOCUG00000003191 | SUGCT    | -0,76 | -1,192 |
| ENSOCUG00000013805 | HNRNPDL  | -0,76 | -0,728 |
| ENSOCUG00000003043 | TYW3     | -0,76 | -0,730 |
| ENSOCUG00000011824 | RIOK1    | -0,76 | -0,710 |
| ENSOCUG00000023014 | AAMP     | -0,77 | -0,838 |
| ENSOCUG00000006655 | HSPA9    | -0,77 | -1,108 |
| ENSOCUG00000003390 | PAF1     | -0,77 | -0,835 |
| ENSOCUG00000011752 | PYGO1    | -0,77 | -0,482 |
| ENSOCUG00000006212 | POLR3GL  | -0,78 | -0,719 |
| ENSOCUG00000009193 | RRP9     | -0,78 | -1,051 |
| ENSOCUG00000005763 | FAM177A1 | -0,78 | -0,668 |
| ENSOCUG00000013592 | RWDD1    | -0,78 | -0,807 |
| ENSOCUG00000002378 | PFDN2    | -0,78 | -1,035 |
| ENSOCUG00000006219 | NUDT2    | -0,78 | -0,693 |
| ENSOCUG00000004615 | BUD13    | -0,78 | -0,412 |
| ENSOCUG00000021270 | PARP3    | -0,78 | -0,641 |
| ENSOCUG00000014434 | AATF     | -0,78 | -0,702 |
| ENSOCUG00000028153 | GON7     | -0,79 | -1,130 |
| ENSOCUG00000011624 | FIBIN    | -0,79 | -0,798 |
| ENSOCUG00000023754 | PNKD     | -0,79 | -0,825 |
| ENSOCUG00000008113 | UQCRB    | -0,79 | -1,256 |
| ENSOCUG00000002743 | HNRNPA3  | -0,79 | -0,898 |
| ENSOCUG00000010559 | PFDN6    | -0,79 | -1,200 |
| ENSOCUG00000005208 | MTHFD2   | -0,79 | -1,094 |
| ENSOCUG00000027218 | SLC22A22 | -0,79 | -0,656 |
| ENSOCUG00000016712 | DNER     | -0,80 | -0,835 |
| ENSOCUG00000006203 | DUSP27   | -0,80 | -0,979 |
| ENSOCUG00000010919 | PABPC5   | -0,80 | -0,790 |
| ENSOCUG00000010523 | DPH5     | -0,80 | -0,501 |
| ENSOCUG00000021102 | SNURF    | -0,81 | -0,866 |
| ENSOCUG00000005711 | CETN3    | -0,81 | -0,689 |
| ENSOCUG00000005790 | FAM81A   | -0,81 | -0,856 |
| ENSOCUG00000006549 | CD1D     | -0,81 | -0,886 |
| ENSOCUG00000006984 | MRPS25   | -0,81 | -0,960 |
| ENSOCUG00000010925 | SNRPF    | -0,82 | -0,783 |
| ENSOCUG00000003547 | MRPS5    | -0,82 | -0,872 |
| ENSOCUG00000011069 | NDUFB3   | -0,82 | -1,434 |
| ENSOCUG00000015017 | MRPS9    | -0,82 | -0,989 |
| ENSOCUG00000001264 | CMYA5    | -0,83 | -1,355 |
| ENSOCUG00000027424 | PRPF38B  | -0,83 | -0,864 |

|                    |          |       |        |
|--------------------|----------|-------|--------|
| ENSOCUG00000022010 | C5orf30  | -0,83 | -1,090 |
| ENSOCUG00000002920 | AIFM1    | -0,83 | -1,206 |
| ENSOCUG00000026246 | SEM1     | -0,83 | -1,152 |
| ENSOCUG00000002904 | CHMP4A   | -0,84 | -0,657 |
| ENSOCUG00000009933 | GCSAM    | -0,84 | -0,621 |
| ENSOCUG00000007933 | C6orf47  | -0,84 | -0,826 |
| ENSOCUG00000023406 | PPP1R14A | -0,84 | -0,554 |
| ENSOCUG00000015835 | MYO1E    | -0,84 | -0,386 |
| ENSOCUG00000025074 | NDUFB9   | -0,84 | -1,398 |
| ENSOCUG00000002023 | TAF11    | -0,84 | -0,828 |
| ENSOCUG00000014072 | ISCA2    | -0,84 | -1,274 |
| ENSOCUG00000003923 | LSY1     | -0,84 | -0,848 |
| ENSOCUG00000029108 | ND4      | -0,84 | -1,369 |
| ENSOCUG00000026424 | HNRNPAB  | -0,84 | -0,895 |
| ENSOCUG00000029102 | ATP6     | -0,85 | -1,395 |
| ENSOCUG00000001161 | HYPK     | -0,85 | -1,038 |
| ENSOCUG00000017035 | TRIM54   | -0,85 | -1,459 |
| ENSOCUG00000029086 | ND1      | -0,85 | -1,306 |
| ENSOCUG00000029105 | ND3      | -0,85 | -1,124 |
| ENSOCUG00000011785 | KLHL38   | -0,85 | -0,777 |
| ENSOCUG00000002542 | SLC22A2  | -0,85 | -0,856 |
| ENSOCUG00000010664 | HDGF     | -0,85 | -0,774 |
| ENSOCUG00000003981 | ANAPC15  | -0,86 | -0,94  |
| ENSOCUG00000011821 | TPM3     | -0,86 | -0,686 |
| ENSOCUG00000004031 | NUB1     | -0,86 | -0,911 |
| ENSOCUG00000012659 | TUFT1    | -0,86 | -0,916 |
| ENSOCUG00000006323 | INO80E   | -0,86 | -0,562 |
| ENSOCUG00000008001 | SLC38A5  | -0,87 | -0,740 |
| ENSOCUG00000027476 | TSPYL2   | -0,87 | -0,709 |
| ENSOCUG00000007279 | F11      | -0,87 | -0,992 |
| ENSOCUG00000016425 | CCDC112  | -0,87 | -0,883 |
| ENSOCUG00000016222 | TXLNB    | -0,87 | -1,423 |
| ENSOCUG00000006634 | FAM107B  | -0,87 | -0,774 |
| ENSOCUG00000024972 | SNORD15  | -0,87 | -0,852 |
| ENSOCUG00000011848 | PSMB6    | -0,87 | -0,822 |
| ENSOCUG00000002107 | CALM3    | -0,88 | -0,773 |
| ENSOCUG00000021228 | DHRS11   | -0,88 | -1,327 |
| ENSOCUG00000015401 | MXI1     | -0,88 | -0,741 |
| ENSOCUG00000012173 | MEF2D    | -0,89 | -0,740 |
| ENSOCUG00000016630 | KIF21A   | -0,89 | -0,937 |
| ENSOCUG00000003744 | FAM104A  | -0,89 | -0,575 |
| ENSOCUG00000015719 | SCO1     | -0,89 | -1,196 |
| ENSOCUG00000026892 | FKBP3    | -0,89 | -1,471 |
| ENSOCUG00000012618 | DDRGK1   | -0,89 | -0,695 |
| ENSOCUG00000008959 | MYOZ2    | -0,90 | -1,563 |

|                    |             |       |        |
|--------------------|-------------|-------|--------|
| ENSOCUG00000011037 | MYH7        | -0,90 | -1,557 |
| ENSOCUG00000024040 | PLSCR1      | -0,90 | -0,787 |
| ENSOCUG00000011023 | NRAP        | -0,90 | -1,263 |
| ENSOCUG00000007447 | RSL24D1     | -0,90 | -0,757 |
| ENSOCUG00000015700 | TRIM26      | -0,90 | -0,630 |
| ENSOCUG00000016049 | COA7        | -0,90 | -1,166 |
| ENSOCUG00000009658 | PES1        | -0,90 | -0,417 |
| ENSOCUG00000017768 | PCP4L1      | -0,90 | -1,609 |
| ENSOCUG00000005736 | FAM184A     | -0,91 | -0,570 |
| ENSOCUG00000014516 | CCDC68      | -0,91 | -0,654 |
| ENSOCUG00000025551 | RPS24       | -0,91 | -1,171 |
| ENSOCUG00000023038 | PTMA        | -0,91 | -0,771 |
| ENSOCUG00000019837 | SNORD89     | -0,92 | -0,894 |
| ENSOCUG00000009187 | TMEM243     | -0,92 | -0,748 |
| ENSOCUG00000000664 | FRMD5       | -0,92 | -1,282 |
| ENSOCUG00000006760 | LAS1L       | -0,92 | -0,826 |
| ENSOCUG00000023102 | C15orf52    | -0,92 | -1     |
| ENSOCUG00000010712 | MFAP1       | -0,93 | -0,942 |
| ENSOCUG00000017323 | THAP12      | -0,93 | -1,319 |
| ENSOCUG00000029062 | CDR2        | -0,93 | -1,175 |
| ENSOCUG00000006932 | PAIP2       | -0,93 | -0,996 |
| ENSOCUG00000025842 | C19H17orf97 | -0,94 | -0,838 |
| ENSOCUG00000026942 | RPS10       | -0,94 | -0,585 |
| ENSOCUG00000023077 | HABP4       | -0,94 | -1,163 |
| ENSOCUG00000029333 | RP9         | -0,94 | -1,178 |
| ENSOCUG00000004236 | TMCO6       | -0,94 | -0,894 |
| ENSOCUG00000012099 | ETFRF1      | -0,95 | -0,827 |
| ENSOCUG00000005830 | HIGD1A      | -0,96 | -1,316 |
| ENSOCUG00000008707 | RTL5        | -0,96 | -0,578 |
| ENSOCUG00000023130 | EWSR1       | -0,96 | -0,73  |
| ENSOCUG00000025781 | GPATCH4     | -0,96 | -1,179 |
| ENSOCUG00000028175 | QRSL1       | -0,97 | -0,963 |
| ENSOCUG00000027653 | LSM3        | -0,97 | -0,729 |
| ENSOCUG00000014678 | KLHL34      | -0,97 | -1,779 |
| ENSOCUG00000021332 | SNORD107    | -0,98 | -1,190 |
| ENSOCUG00000000569 | TERB1       | -0,99 | -0,843 |
| ENSOCUG00000025062 | SDHAF4      | -0,99 | -1,346 |
| ENSOCUG00000000553 | TCEAL1      | -0,99 | -1,308 |
| ENSOCUG00000026859 | HNRNPA2B1   | -1,00 | -0,894 |
| ENSOCUG00000013961 | DNAH11      | -1,00 | -0,987 |
| ENSOCUG00000024272 | NEXN        | -1,00 | -1,371 |
| ENSOCUG00000016826 | SPRYD3      | -1,00 | -0,774 |
| ENSOCUG00000016107 | EFNA5       | -1,00 | -0,993 |
| ENSOCUG00000007414 | NAP1L2      | -1,00 | -0,943 |
| ENSOCUG00000017131 | LMOD2       | -1,00 | -1,771 |

|                    |          |       |        |
|--------------------|----------|-------|--------|
| ENSOCUG00000021209 | MT2D     | -1,00 | -0,835 |
| ENSOCUG00000019604 | snoZ17   | -1,01 | -1,103 |
| ENSOCUG00000005141 | CHST11   | -1,01 | -1,138 |
| ENSOCUG00000028131 | BEX3     | -1,01 | -1,050 |
| ENSOCUG00000004295 | ZRSR2    | -1,02 | -1,011 |
| ENSOCUG00000029090 | ND2      | -1,02 | -1,476 |
| ENSOCUG00000007983 | TNNC1    | -1,03 | -1,818 |
| ENSOCUG00000004443 | HNRNPH3  | -1,04 | -0,986 |
| ENSOCUG00000016740 | DPF3     | -1,06 | -1,333 |
| ENSOCUG00000026776 | TMA7     | -1,06 | -1,298 |
| ENSOCUG00000027112 | RPL28    | -1,06 | -0,930 |
| ENSOCUG00000017585 | FAM105A  | -1,06 | -1,404 |
| ENSOCUG00000000965 | LY96     | -1,06 | -1,448 |
| ENSOCUG00000019313 | SNORD8   | -1,07 | -0,825 |
| ENSOCUG00000003901 | GAR1     | -1,07 | -0,929 |
| ENSOCUG00000011839 | SOX4     | -1,08 | -0,938 |
| ENSOCUG00000029281 | CCL9     | -1,08 | -1,013 |
| ENSOCUG00000029216 | C15orf48 | -1,08 | -1,003 |
| ENSOCUG00000026622 | ZC3H14   | -1,09 | -1,404 |
| ENSOCUG00000015058 | SET      | -1,09 | -1,121 |
| ENSOCUG00000010213 | UPF3B    | -1,09 | -0,892 |
| ENSOCUG00000012934 | GNB3     | -1,09 | -1,106 |
| ENSOCUG00000010733 | CFTR     | -1,10 | -1,667 |
| ENSOCUG00000014758 | MAP3K15  | -1,11 | -2,794 |
| ENSOCUG00000002838 | TAF15    | -1,11 | -1,087 |
| ENSOCUG00000008065 | MINOS1   | -1,11 | -1,408 |
| ENSOCUG00000028039 | CHGB     | -1,11 | -1,266 |
| ENSOCUG00000007985 | STC2     | -1,12 | -0,921 |
| ENSOCUG00000008954 | GADD45A  | -1,12 | -0,876 |
| ENSOCUG00000025669 | THRAP3   | -1,13 | -1,272 |
| ENSOCUG00000013513 | LBH      | -1,13 | -1,478 |
| ENSOCUG00000029099 | COX2     | -1,14 | -1,558 |
| ENSOCUG00000021449 | POLR2D   | -1,15 | -1,115 |
| ENSOCUG00000017964 | TBCC     | -1,16 | -1,057 |
| ENSOCUG0000002093  | COQ7     | -1,17 | -1,401 |
| ENSOCUG00000003910 | ZNHIT6   | -1,17 | -1,033 |
| ENSOCUG00000006418 | NUDC     | -1,17 | -1,351 |
| ENSOCUG00000020085 | SNORD94  | -1,18 | -0,860 |
| ENSOCUG00000009767 | DTNBP1   | -1,18 | -1,221 |
| ENSOCUG00000007576 | FGF16    | -1,21 | -0,989 |
| ENSOCUG00000009100 | ANKRD23  | -1,22 | -1,431 |
| ENSOCUG00000019747 | SNORD24  | -1,22 | -1,352 |
| ENSOCUG00000024367 | RPP38    | -1,22 | -1,678 |
| ENSOCUG00000017932 | ATPIF1   | -1,23 | -1,759 |
| ENSOCUG00000011026 | BCL2L2   | -1,23 | -1,550 |



|                    |           |       |        |
|--------------------|-----------|-------|--------|
| ENSOCUG00000008791 | SNAPC5    | -1,24 | -1,226 |
| ENSOCUG00000026126 | MB        | -1,24 | -1,721 |
| ENSOCUG00000000545 | CH25H     | -1,25 | -1,266 |
| ENSOCUG00000017358 | TIMM8B    | -1,25 | -1,524 |
| ENSOCUG00000024935 | PDZK1     | -1,26 | -2,249 |
| ENSOCUG00000027844 | SLC24A1   | -1,26 | -1,383 |
| ENSOCUG00000000032 | NUGGC     | -1,28 | -1,584 |
| ENSOCUG00000023188 | Nr1h5     | -1,29 | -0,918 |
| ENSOCUG00000004647 | CSTF2T    | -1,34 | -1,300 |
| ENSOCUG00000017531 | RPL36     | -1,35 | -1,297 |
| ENSOCUG00000014931 | GBP7      | -1,35 | -1,415 |
| ENSOCUG00000021507 | GPNPAT1   | -1,35 | -1,049 |
| ENSOCUG00000005829 | MOGAT1    | -1,37 | -1,870 |
| ENSOCUG00000029393 | L1TD1     | -1,38 | -0,975 |
| ENSOCUG00000029107 | ND4L      | -1,39 | -1,909 |
| ENSOCUG00000002210 | tceal4    | -1,43 | -1,447 |
| ENSOCUG00000008715 | PIN4      | -1,43 | -1,409 |
| ENSOCUG00000020966 | SNORD77   | -1,44 | -1,453 |
| ENSOCUG00000011454 | HRASLS    | -1,45 | -1,577 |
| ENSOCUG00000021723 | SNORD45   | -1,45 | -1,72  |
| ENSOCUG00000013904 | CISH      | -1,46 | -1,106 |
| ENSOCUG00000019028 | SNORD38   | -1,48 | -1,657 |
| ENSOCUG00000006091 | OSR1      | -1,51 | -1,551 |
| ENSOCUG00000022097 | SNORD81   | -1,52 | -1,314 |
| ENSOCUG00000018667 | SNORD118  | -1,53 | -0,905 |
| ENSOCUG00000000491 | TDRD5     | -1,54 | -1,038 |
| ENSOCUG00000012431 | CCDC12    | -1,57 | -1,378 |
| ENSOCUG00000013786 | ACOT13    | -1,57 | -1,688 |
| ENSOCUG00000019623 | SNORD66   | -1,58 | -1,469 |
| ENSOCUG00000018137 | mir107    | -1,62 | -3,129 |
| ENSOCUG00000019714 | SNORD14   | -1,62 | -1,86  |
| ENSOCUG00000024064 | SNORD83   | -1,65 | -1,586 |
| ENSOCUG00000021661 | 5S_rRNA   | -1,71 | -1,656 |
| ENSOCUG00000015658 | LINC00116 | -1,71 | -1,690 |
| ENSOCUG00000006035 | Ccdc162   | -1,84 | -1,539 |
| ENSOCUG00000022805 | ANP32E    | -1,87 | -1,811 |
| ENSOCUG00000020032 | SNORD99   | -1,99 | -1,941 |
| ENSOCUG00000019567 | SNORND104 | -2,00 | -2,292 |
| ENSOCUG00000003240 | IRX5      | -2,06 | -2,192 |
| ENSOCUG00000019264 | mir-30c-2 | -2,08 | -2,629 |
| ENSOCUG00000018179 | SNORD58   | -2,12 | -1,849 |
| ENSOCUG00000015634 | TNNT2     | -2,17 | -2,862 |
| ENSOCUG00000008100 | FAM151A   | -2,38 | -2,493 |
| ENSOCUG00000009056 | PDILT     | -3,13 | -2,450 |

| DEGS only serotonin |            |       |
|---------------------|------------|-------|
| ID                  | GENE ID    | LogFC |
| ENSOCUG17894        | NFKBIE     | 2,496 |
| ENSOCUG1645         | NTF3       | 1,819 |
| ENSOCUG1869         | SNORA21    | 1,664 |
| ENSOCUG2143         | NEFM       | 1,631 |
| ENSOCUG25132        | RPL23A     | 1,515 |
| ENSOCUG276          | TAF1D      | 1,460 |
| ENSOCUG4291         | IGSF6      | 1,268 |
| ENSOCUG21581        | CETN2      | 1,242 |
| ENSOCUG16448        | CCL21      | 1,239 |
| ENSOCUG4133         | HMGB1      | 1,217 |
| ENSOCUG23836        | NEFL       | 1,167 |
| ENSOCUG22945        | ASNS       | 1,132 |
| ENSOCUG11792        | RPS27      | 1,135 |
| ENSOCUG17531        | RPL36al    | 1,112 |
| ENSOCUG24462        | RPL27      | 1,641 |
| ENSOCUG27291        | DENR       | 1,521 |
| ENSOCUG2549         | snoU2_19   | 1,381 |
| ENSOCUG26152        | DBN1       | 0,945 |
| ENSOCUG1161         | HYPK       | 0,895 |
| ENSOCUG17359        | LSM8       | 0,845 |
| ENSOCUG155          | NSRP1      | 0,816 |
| ENSOCUG9848         | EEF1B2     | 0,893 |
| ENSOCUG1534         | DLG2       | 0,862 |
| ENSOCUG2829         | TBCA       | 0,798 |
| ENSOCUG4614         | SF3B4      | 0,792 |
| ENSOCUG179          | RPS15A     | 0,779 |
| ENSOCUG24611        | HNRNPM     | 0,776 |
| ENSOCUG4236         | TMCO6      | 0,775 |
| ENSOCUG821          | CBX1       | 0,744 |
| ENSOCUG27112        | RPL28      | 0,742 |
| ENSOCUG994          | FKBP1A     | 0,729 |
| ENSOCUG29397        | ANP32B     | 0,722 |
| ENSOCUG1614         | ATAD2      | 0,720 |
| ENSOCUG25918        | HIST2H2AA4 | 0,713 |
| ENSOCUG977          | PRELP      | 0,683 |
| ENSOCUG732          | HMG2       | 0,678 |
| ENSOCUG1925         | SNRPF      | 0,669 |
| ENSOCUG21825        | HMG1       | 0,666 |
| ENSOCUG13753        | SYTL2      | 0,665 |
| ENSOCUG7222         | TPM3-rs7   | 0,664 |

|              |            |       |
|--------------|------------|-------|
| ENSOCUG221   | C5orf3     | 0,663 |
| ENSOCUG2198  | RPS23      | 0,659 |
| ENSOCUG2915  | ND3        | 0,656 |
| ENSOCUG1712  | MFAP1      | 0,640 |
| ENSOCUG16362 | ADAMTS1    | 0,631 |
| ENSOCUG871   | FAT4       | 0,625 |
| ENSOCUG7286  | COL4A4     | 0,599 |
| ENSOCUG368   | RPS2       | 0,593 |
| ENSOCUG15783 | CDKN2AIPNL | 0,582 |
| ENSOCUG15894 | PYURF      | 0,571 |
| ENSOCUG12472 | RPS24      | 0,569 |
| ENSOCUG924   | SEC11C     | 0,566 |
| ENSOCUG1469  | PDCL3      | 0,563 |
| ENSOCUG12181 | LEO1       | 0,562 |
| ENSOCUG22967 | SNRNP27    | 0,559 |
| ENSOCUG6641  | EPB41      | 0,552 |
| ENSOCUG14425 | FILIP1L    | 0,552 |
| ENSOCUG1799  | EPB41L2    | 0,549 |
| ENSOCUG13664 | ZCRB1      | 0,548 |
| ENSOCUG2971  | ZNF81      | 0,545 |
| ENSOCUG11373 | RPS1       | 0,544 |
| ENSOCUG1197  | PHAX       | 0,543 |
| ENSOCUG8288  | ECM2       | 0,542 |
| ENSOCUG2542  | SLC22A2    | 0,540 |
| ENSOCUG11854 | IKBIP      | 0,530 |
| ENSOCUG16624 | MYH1       | 0,522 |
| ENSOCUG17932 | ATPIF1     | 0,582 |
| ENSOCUG5414  | ESF1       | 0,518 |
| ENSOCUG11743 | SLU7       | 0,490 |
| ENSOCUG23276 | MORF4L1    | 0,486 |
| ENSOCUG1184  | PPIG       | 0,485 |
| ENSOCUG4223  | IK         | 0,483 |
| ENSOCUG2748  | S1A13      | 0,483 |
| ENSOCUG11788 | JTB        | 0,480 |
| ENSOCUG1257  | HTATSF1    | 0,478 |
| ENSOCUG74    | HMGB2      | 0,478 |
| ENSOCUG7447  | RSL24D1    | 0,477 |
| ENSOCUG2765  | LUC7L3     | 0,476 |
| ENSOCUG1117  | SARNP      | 0,474 |
| ENSOCUG22928 | RPL11      | 0,473 |
| ENSOCUG9299  | GNPTAB     | 0,477 |
| ENSOCUG9924  | CCDC25     | 0,478 |

|              |          |       |
|--------------|----------|-------|
| ENSOCUG25115 | MPHOSPH1 | 0,462 |
| ENSOCUG4312  | NCL      | 0,452 |
| ENSOCUG5711  | CETN3    | 0,452 |
| ENSOCUG1335  | HNRNPA1  | 0,448 |
| ENSOCUG14267 | RDX      | 0,445 |
| ENSOCUG13737 | RBM25    | 0,435 |
| ENSOCUG2176  | PNN      | 0,432 |
| ENSOCUG632   | SMARCA2  | 0,432 |
| ENSOCUG22295 | COX17    | 0,431 |
| ENSOCUG15438 | MIER1    | 0,430 |
| ENSOCUG13857 | NAP1L1   | 0,429 |
| ENSOCUG2551  | CNTLN    | 0,425 |
| ENSOCUG941   | BOD1L1   | 0,425 |
| ENSOCUG23764 | CCDC8    | 0,425 |
| ENSOCUG9295  | EEA1     | 0,422 |
| ENSOCUG9623  | LTV1     | 0,422 |
| ENSOCUG5336  | ABI3BP   | 0,426 |
| ENSOCUG1175  | HACD2    | 0,419 |
| ENSOCUG2986  | ND1      | 0,416 |
| ENSOCUG21154 | EIF5B    | 0,416 |
| ENSOCUG8127  | CALD1    | 0,412 |
| ENSOCUG463   | GTF3C3   | 0,412 |
| ENSOCUG9645  | SAT1     | 0,413 |
| ENSOCUG8367  | MLEC     | 0,498 |
| ENSOCUG166   | RPS12    | 0,486 |
| ENSOCUG5685  | TRIP11   | 0,471 |
| ENSOCUG6874  | CFAP36   | 0,454 |
| ENSOCUG5553  | GNAI3    | 0,429 |
| ENSOCUG2285  | ANP32E   | 0,418 |
| ENSOCUG27424 | PRPF38B  | 0,399 |
| ENSOCUG347   | KRTCAP2  | 0,398 |
| ENSOCUG917   | OGN      | 0,398 |
| ENSOCUG5724  | TTC1     | 0,397 |
| ENSOCUG2132  | RRBP1    | 0,397 |
| ENSOCUG2225  | RPL19    | 0,395 |
| ENSOCUG665   | ARID4B   | 0,395 |
| ENSOCUG29674 | RPL37    | 0,395 |
| ENSOCUG27851 | PARG     | 0,394 |
| ENSOCUG872   | SEC62    | 0,392 |
| ENSOCUG2217  | ARL1     | 0,392 |
| ENSOCUG938   | FRG1     | 0,390 |
| ENSOCUG29233 | ASPH     | 0,389 |

|              |         |       |
|--------------|---------|-------|
| ENSOCUG1837  | SRSF4   | 0,388 |
| ENSOCUG26829 | CCDC9B  | 0,388 |
| ENSOCUG29299 | CHD3    | 0,387 |
| ENSOCUG14895 | NUCKS1  | 0,382 |
| ENSOCUG853   | NOL8    | 0,387 |
| ENSOCUG11646 | ZFP9    | 0,380 |
| ENSOCUG6689  | CFDP1   | 0,380 |
| ENSOCUG5247  | FSTL1   | 0,379 |
| ENSOCUG549   | GOLIM4  | 0,379 |
| ENSOCUG9319  | PSIP1   | 0,372 |
| ENSOCUG17849 | GCC2    | 0,372 |
| ENSOCUG2788  | ZEB2    | 0,376 |
| ENSOCUG1855  | RPL36AL | 0,368 |
| ENSOCUG1277  | FYTTD1  | 0,368 |
| ENSOCUG681   | TXLNG   | 0,366 |
| ENSOCUG11923 | RSF1    | 0,366 |
| ENSOCUG13128 | NKTR    | 0,365 |
| ENSOCUG9     | CLTA    | 0,362 |
| ENSOCUG1643  | SEC63   | 0,362 |
| ENSOCUG987   | PNISR   | 0,361 |
| ENSOCUG1319  | SREK1   | 0,360 |
| ENSOCUG14412 | ERLEC1  | 0,358 |
| ENSOCUG12947 | SPCS2   | 0,356 |
| ENSOCUG139   | RPL14   | 0,347 |
| ENSOCUG4142  | MYH9    | 0,346 |
| ENSOCUG4739  | RFC1    | 0,345 |
| ENSOCUG12    | ZCCHC7  | 0,341 |
| ENSOCUG1843  | MSL2    | 0,349 |
| ENSOCUG15665 | NTN4    | 0,349 |
| ENSOCUG4864  | CASK    | 0,338 |
| ENSOCUG22926 | DNAJC1  | 0,337 |
| ENSOCUG97    | SATB2   | 0,336 |
| ENSOCUG26424 | HNRNPAB | 0,327 |
| ENSOCUG845   | NCBP3   | 0,327 |
| ENSOCUG139   | GOLGA4  | 0,325 |
| ENSOCUG11554 | KIAA226 | 0,324 |
| ENSOCUG3637  | CGNL1   | 0,324 |
| ENSOCUG6153  | PSPC1   | 0,320 |
| ENSOCUG12546 | ZNF462  | 0,320 |
| ENSOCUG24529 | SLC7A12 | 0,319 |
| ENSOCUG1357  | HNRNPD  | 0,319 |
| ENSOCUG3399  | HMG3    | 0,316 |

|              |          |       |
|--------------|----------|-------|
| ENSOCUG7579  | ATRX     | 0,316 |
| ENSOCUG12    | ARF1     | 0,316 |
| ENSOCUG2328  | UBTF     | 0,315 |
| ENSOCUG29654 | ZNF568   | 0,313 |
| ENSOCUG27344 | CSF2RB   | 0,311 |
| ENSOCUG1881  | ING3     | 0,318 |
| ENSOCUG132   | IFT74    | 0,353 |
| ENSOCUG182   | MAML2    | 0,337 |
| ENSOCUG15914 | PRRC2C   | 0,346 |
| ENSOCUG7844  | SOS1     | 0,344 |
| ENSOCUG4346  | RBBP6    | 0,299 |
| ENSOCUG11142 | SMC3     | 0,297 |
| ENSOCUG1226  | DDX46    | 0,291 |
| ENSOCUG5362  | CASC4    | 0,286 |
| ENSOCUG17534 | FNBP4    | 0,283 |
| ENSOCUG1737  | SMC6     | 0,283 |
| ENSOCUG27562 | PPP3R1   | 0,289 |
| ENSOCUG13277 | TET1     | 0,275 |
| ENSOCUG429   | CEP29    | 0,276 |
| ENSOCUG145   | ZNF638   | 0,273 |
| ENSOCUG15484 | CRNKL1   | 0,271 |
| ENSOCUG1288  | TMEM16B  | 0,267 |
| ENSOCUG434   | DDX42    | 0,266 |
| ENSOCUG4778  | RABEP1   | 0,265 |
| ENSOCUG1742  | CASP8AP2 | 0,264 |
| ENSOCUG12142 | RBM33    | 0,262 |
| ENSOCUG6227  | JAK1     | 0,261 |
| ENSOCUG4848  | ROCK1    | 0,267 |
| ENSOCUG4653  | METAP2   | 0,259 |
| ENSOCUG21376 | PTPRA    | 0,259 |
| ENSOCUG1385  | HNRNPD   | 0,256 |
| ENSOCUG75    | PITPNA   | 0,255 |
| ENSOCUG11638 | RBM6     | 0,245 |
| ENSOCUG29392 | HNRNPA3  | 0,244 |
| ENSOCUG11765 | CC2D2A   | 0,245 |
| ENSOCUG1741  | ITPR2    | 0,243 |
| ENSOCUG4386  | NFAT5    | 0,236 |
| ENSOCUG2     | SMCHD1   | 0,233 |
| ENSOCUG1629  | CALCOCO2 | 0,232 |
| ENSOCUG1312  | PHC3     | 0,236 |
| ENSOCUG1552  | PHF3     | 0,230 |
| ENSOCUG15381 | QSER1    | 0,229 |

|              |           |        |
|--------------|-----------|--------|
| ENSOCUG116   | CHD9      | 0,229  |
| ENSOCUG6443  | SECISBP2L | 0,225  |
| ENSOCUG2451  | EIF4G3    | 0,224  |
| ENSOCUG464   | ZRANB2    | 0,222  |
| ENSOCUG879   | KMT2E     | 0,220  |
| ENSOCUG431   | CCDC47    | 0,216  |
| ENSOCUG848   | SUPT6H    | 0,200  |
| ENSOCUG1474  | DST       | 0,199  |
| ENSOCUG1587  | APP       | 0,183  |
| ENSOCUG4462  | PCF11     | 0,179  |
| ENSOCUG1651  | LNPEP     | -0,214 |
| ENSOCUG1546  | LRPPRC    | -0,242 |
| ENSOCUG653   | NDRG2     | -0,268 |
| ENSOCUG1365  | KLHL24    | -0,277 |
| ENSOCUG412   | ENTPD4    | -0,282 |
| ENSOCUG186   | ENO1      | -0,282 |
| ENSOCUG919   | ADGRA3    | -0,284 |
| ENSOCUG21231 | CCT5      | -0,287 |
| ENSOCUG6592  | EIF2S3    | -0,293 |
| ENSOCUG21839 | ATP2C1    | -0,298 |
| ENSOCUG1445  | TFAM      | -0,347 |
| ENSOCUG25429 | RAB12     | -0,339 |
| ENSOCUG4268  | KIAA368   | -0,351 |
| ENSOCUG284   | Dcaf11    | -0,353 |
| ENSOCUG547   | PDPR      | -0,355 |
| ENSOCUG69    | ATP5B     | -0,378 |
| ENSOCUG1455  | GPI       | -0,382 |
| ENSOCUG25719 | Nomo1     | -0,389 |
| ENSOCUG749   | C6orf89   | -0,398 |
| ENSOCUG1553  | MAP3K2    | -0,427 |
| ENSOCUG9289  | CHPT1     | -0,495 |
| ENSOCUG7781  | POLDIP2   | -0,419 |
| ENSOCUG17877 | DPY3      | -0,424 |
| ENSOCUG1688  | HSDL2     | -0,442 |
| ENSOCUG27435 | RPS11     | -0,442 |
| ENSOCUG743   | AUH       | -0,454 |
| ENSOCUG1328  | ARHGEF3   | -0,468 |
| ENSOCUG1582  | ATP2A2    | -0,483 |
| ENSOCUG12    | HADHB     | -0,485 |
| ENSOCUG6119  | PKM       | -0,490 |
| ENSOCUG9369  | VDAC1     | -0,529 |
| ENSOCUG13512 | NDUFS2    | -0,538 |

|                            |                |              |
|----------------------------|----------------|--------------|
| ENSOCUG11782               | MIPEP          | -0,545       |
| ENSOCUG11847               | SLC25A3        | -0,542       |
| ENSOCUG3891                | UQRC2          | -0,543       |
| ENSOCUG1314                | CAMTA1         | -0,573       |
| ENSOCUG13369               | ITGA5          | -0,585       |
| ENSOCUG8785                | IGF2R          | -0,594       |
| ENSOCUG11623               | PRMT7          | -0,625       |
| ENSOCUG12491               | OSGEPL1        | -0,636       |
| ENSOCUG11689               | PDE4D          | -0,642       |
| ENSOCUG7487                | SLCO1C1        | -0,686       |
| ENSOCUG29279               | SZRD1          | -0,733       |
| ENSOCUG2556                | ECH1           | -0,737       |
| ENSOCUG1265                | RGP1           | -0,785       |
| ENSOCUG146                 | APOO           | -0,883       |
| ENSOCUG9644                | TUBE1          | -0,919       |
| ENSOCUG8325                | ALDH2          | -1,214       |
| ENSOCUG12213               | DYNC111        | -1,635       |
| ENSOCUG26758               | SNORA68        | -1,182       |
| ENSOCUG13999               | ZNF593         | -1,359       |
| ENSOCUG1388                | RBPM52         | -1,574       |
| ENSOCUG27222               | FRMPD4         | -1,859       |
| ENSOCUG29681               | NRXN3          | -1,911       |
| ENSOCUG11686               | SLC38A3        | -2,485       |
| <b>DEGS only pergolide</b> |                |              |
| <b>ID</b>                  | <b>GENE ID</b> | <b>LogFC</b> |
| ENSOCUG00000017185         | CYP3E1         | 3,552        |
| ENSOCUG0000001864          | AQP8           | 3,380        |
| ENSOCUG00000007172         | SCD            | 3,356        |
| ENSOCUG00000011380         | CIDEA          | 3,188        |
| ENSOCUG00000009086         | KLB            | 3,150        |
| ENSOCUG00000010189         | LEP            | 2,848        |
| ENSOCUG00000019393         | SNORA74        | 2,832        |
| ENSOCUG00000009443         | SLC7A10        | 2,720        |
| ENSOCUG00000016168         | ABCD2          | 2,659        |
| ENSOCUG00000000957         | THRSP          | 2,636        |
| ENSOCUG00000023401         | ADH2-2         | 2,573        |
| ENSOCUG00000022985         | CEBPA          | 2,389        |
| ENSOCUG00000004222         | SLC22A3        | 2,376        |
| ENSOCUG00000017851         | AQP7           | 2,337        |
| ENSOCUG00000004633         | PTGER3         | 2,264        |
| ENSOCUG00000021038         | RPL23          | 2,217        |



|                    |           |       |
|--------------------|-----------|-------|
| ENSOCUG00000013069 | ELOVL6    | 2,192 |
| ENSOCUG00000013514 | MGST1     | 2,140 |
| ENSOCUG00000013194 | PPARG     | 2,110 |
| ENSOCUG00000024925 | MIS12     | 1,770 |
| ENSOCUG00000026717 | Hist1h3b  | 1,767 |
| ENSOCUG00000009833 | SLC24A3   | 1,762 |
| ENSOCUG00000021306 | HIST1H2AK | 1,719 |
| ENSOCUG00000012271 | TNFSF13B  | 1,627 |
| ENSOCUG00000007847 | GLYCTK    | 1,608 |
| ENSOCUG00000024115 | ASGR2     | 1,579 |
| ENSOCUG00000026268 | ADIPOQ    | 1,564 |
| ENSOCUG00000011308 | MASTL     | 1,556 |
| ENSOCUG00000025069 | HIST1H2AE | 1,516 |
| ENSOCUG00000019693 | SNORA55   | 1,508 |
| ENSOCUG00000011007 | LRP2      | 1,499 |
| ENSOCUG00000027274 | ABTB1     | 1,492 |
| ENSOCUG00000023396 | CST6      | 1,477 |
| ENSOCUG00000013802 | ALDOC     | 1,461 |
| ENSOCUG00000010020 | DNAJC6    | 1,451 |
| ENSOCUG00000027626 | CD247     | 1,419 |
| ENSOCUG00000029367 | C1QA      | 1,405 |
| ENSOCUG00000005192 | TMEM136   | 1,323 |
| ENSOCUG00000015728 | GPD1      | 1,305 |
| ENSOCUG00000017233 | HIST1H1D  | 1,296 |
| ENSOCUG00000006245 | FKBPL     | 1,277 |
| ENSOCUG00000008833 | AQP4      | 1,273 |
| ENSOCUG00000024481 | CAPN3     | 1,270 |
| ENSOCUG00000025743 | MAL2      | 1,270 |
| ENSOCUG00000015308 | SLCO1B2   | 1,269 |
| ENSOCUG00000014223 | DGAT2     | 1,251 |
| ENSOCUG00000006916 | BLVRA     | 1,233 |
| ENSOCUG00000017587 | LRRC4C    | 1,223 |
| ENSOCUG00000009662 | BCO2      | 1,210 |
| ENSOCUG00000009044 | CIART     | 1,201 |
| ENSOCUG00000022840 | RAD17     | 1,186 |
| ENSOCUG00000007438 | C3AR1     | 1,183 |
| ENSOCUG00000004730 | SYBU      | 1,177 |
| ENSOCUG00000011612 | RGS18     | 1,156 |
| ENSOCUG00000017716 | CPS1      | 1,155 |
| ENSOCUG00000000972 | SORCS1    | 1,154 |
| ENSOCUG00000024729 | HSPB3     | 1,136 |
| ENSOCUG00000001824 | TLR1      | 1,127 |

|                     |          |       |
|---------------------|----------|-------|
| ENSOCUG00000009657  | SDR16C5  | 1,107 |
| ENSOCUG00000000437  | DTL      | 1,091 |
| ENSOCUG000000008690 | TMCO4    | 1,085 |
| ENSOCUG000000002974 | KAZALD1  | 1,076 |
| ENSOCUG000000009952 | NDST3    | 1,074 |
| ENSOCUG000000011674 | BMP2     | 1,047 |
| ENSOCUG000000003842 | CDC42SE2 | 1,038 |
| ENSOCUG000000023599 | APOD     | 1,033 |
| ENSOCUG00000001130  | PIGF     | 1,009 |
| ENSOCUG000000014710 | USH2A    | 1,004 |
| ENSOCUG000000001910 | ADGRL3   | 0,997 |
| ENSOCUG000000005490 | AAR2     | 0,981 |
| ENSOCUG000000009473 | PANX1    | 0,964 |
| ENSOCUG000000005990 | FAM198A  | 0,959 |
| ENSOCUG000000014832 | STEAP2   | 0,946 |
| ENSOCUG000000012810 | C11orf54 | 0,936 |
| ENSOCUG000000002428 | PRADC1   | 0,935 |
| ENSOCUG000000014800 | PLP1     | 0,923 |
| ENSOCUG000000005457 | SLC27A3  | 0,920 |
| ENSOCUG000000021947 | SLC1A3   | 0,918 |
| ENSOCUG000000000426 | RAB29    | 0,917 |
| ENSOCUG000000002932 | RAB33A   | 0,910 |
| ENSOCUG000000014622 | AKR7A2   | 0,904 |
| ENSOCUG000000000578 | PDP2     | 0,897 |
| ENSOCUG000000006810 | ELMOD2   | 0,892 |
| ENSOCUG000000006003 | ERP27    | 0,890 |
| ENSOCUG000000013253 | CNP      | 0,883 |
| ENSOCUG000000015092 | C4orf33  | 0,882 |
| ENSOCUG000000004058 | PEX12    | 0,875 |
| ENSOCUG000000011287 | UBE2NL   | 0,868 |
| ENSOCUG000000001543 | FAM13C   | 0,858 |
| ENSOCUG000000001144 | SLC6A6   | 0,844 |
| ENSOCUG000000021288 | TXNDC9   | 0,840 |
| ENSOCUG000000017423 | PCSK6    | 0,832 |
| ENSOCUG000000015239 | RPS27A   | 0,832 |
| ENSOCUG000000012531 | NEU3     | 0,830 |
| ENSOCUG000000015622 | METTTL7A | 0,825 |
| ENSOCUG000000024437 | TMOD3    | 0,817 |
| ENSOCUG000000017101 | PDZD11   | 0,815 |
| ENSOCUG000000003683 | GPR155   | 0,815 |
| ENSOCUG000000027426 | GXYLT1   | 0,813 |
| ENSOCUG000000011385 | GPR22    | 0,809 |

|                    |               |       |
|--------------------|---------------|-------|
| ENSOCUG00000004490 | GUCY1A2       | 0,791 |
| ENSOCUG00000004895 | ADAMTSL1      | 0,789 |
| ENSOCUG00000011475 | TOR3A         | 0,784 |
| ENSOCUG00000008061 | 4930595M18Rik | 0,780 |
| ENSOCUG00000004174 | PSD4          | 0,775 |
| ENSOCUG00000008330 | CSRP2         | 0,773 |
| ENSOCUG00000008651 | ITM2A         | 0,762 |
| ENSOCUG00000015076 | FXN           | 0,750 |
| ENSOCUG00000002795 | FMO4          | 0,747 |
| ENSOCUG00000013790 | CMC2          | 0,747 |
| ENSOCUG00000008546 | SLC25A16      | 0,741 |
| ENSOCUG00000006667 | MOCS1         | 0,730 |
| ENSOCUG00000015755 | DENND2D       | 0,728 |
| ENSOCUG00000017729 | SCN7A         | 0,727 |
| ENSOCUG00000002492 | CD36          | 0,719 |
| ENSOCUG00000000388 | LYPLAL1       | 0,717 |
| ENSOCUG00000003350 | MRPS23        | 0,708 |
| ENSOCUG00000011890 | MED30         | 0,703 |
| ENSOCUG00000006357 | ADAMTS12      | 0,698 |
| ENSOCUG00000014373 | C4BPA         | 0,687 |
| ENSOCUG00000016911 | TDRD12        | 0,685 |
| ENSOCUG00000016368 | TMEM14C       | 0,685 |
| ENSOCUG00000009154 | SKP2          | 0,685 |
| ENSOCUG00000024578 | C9orf85       | 0,680 |
| ENSOCUG00000022231 | EMP1          | 0,679 |
| ENSOCUG00000022997 | DNAJB6        | 0,677 |
| ENSOCUG00000017402 | ARSG          | 0,676 |
| ENSOCUG00000005592 | LUM           | 0,672 |
| ENSOCUG00000003144 | BPGM          | 0,667 |
| ENSOCUG00000022022 | ATP5J2        | 0,667 |
| ENSOCUG00000016548 | ROR2          | 0,662 |
| ENSOCUG00000002522 | PTGFR         | 0,661 |
| ENSOCUG00000000526 | PRCP          | 0,657 |
| ENSOCUG00000026691 | SLC31A2       | 0,656 |
| ENSOCUG00000012719 | HSPA12B       | 0,653 |
| ENSOCUG00000000093 | SMYD4         | 0,648 |
| ENSOCUG00000014585 | ZDHHC2        | 0,646 |
| ENSOCUG00000016211 | SNTB1         | 0,639 |
| ENSOCUG00000015948 | COA3          | 0,636 |
| ENSOCUG00000017549 | TWSG1         | 0,628 |
| ENSOCUG00000013390 | MRPL16        | 0,628 |
| ENSOCUG00000015736 | PHLPP1        | 0,627 |

|                    |          |       |
|--------------------|----------|-------|
| ENSOCUG00000024555 | KCTD12   | 0,626 |
| ENSOCUG00000011209 | SPATA5L1 | 0,626 |
| ENSOCUG00000002085 | SLC25A36 | 0,623 |
| ENSOCUG00000003689 | NID2     | 0,623 |
| ENSOCUG00000015110 | WDR17    | 0,620 |
| ENSOCUG00000007507 | SLC25A26 | 0,612 |
| ENSOCUG00000010565 | TPCN3    | 0,606 |
| ENSOCUG00000006500 | SLC4A4   | 0,602 |
| ENSOCUG00000005274 | PRLR     | 0,602 |
| ENSOCUG00000012504 | ORMDL1   | 0,601 |
| ENSOCUG00000010524 | RBP4     | 0,595 |
| ENSOCUG00000011995 | TBC1D7   | 0,595 |
| ENSOCUG00000007182 | GAS2L3   | 0,594 |
| ENSOCUG00000006896 | RPP30    | 0,593 |
| ENSOCUG00000005347 | PIF1     | 0,584 |
| ENSOCUG00000004480 | CSRP3    | 0,579 |
| ENSOCUG00000016457 | SIKE1    | 0,573 |
| ENSOCUG00000015315 | ALDH4A1  | 0,571 |
| ENSOCUG00000015732 | FAM198B  | 0,568 |
| ENSOCUG00000013108 | HIKESHI  | 0,566 |
| ENSOCUG00000000356 | GBA      | 0,562 |
| ENSOCUG00000008513 | MYO1D    | 0,560 |
| ENSOCUG00000001622 | RFK      | 0,553 |
| ENSOCUG00000026291 | ARRB1    | 0,552 |
| ENSOCUG00000016663 | KIAA0391 | 0,548 |
| ENSOCUG00000013383 | RTN4IP1  | 0,545 |
| ENSOCUG00000025632 | SUCLA2   | 0,544 |
| ENSOCUG00000015126 | FRMD6    | 0,543 |
| ENSOCUG00000010780 | LRRC8B   | 0,543 |
| ENSOCUG00000027070 | AMPD2    | 0,537 |
| ENSOCUG00000014051 | IL17RD   | 0,537 |
| ENSOCUG00000005895 | ATP6V0B  | 0,528 |
| ENSOCUG00000013690 | FAM49B   | 0,522 |
| ENSOCUG00000009279 | ABCA1    | 0,522 |
| ENSOCUG00000012046 | SNX24    | 0,521 |
| ENSOCUG00000003516 | GYG1     | 0,518 |
| ENSOCUG00000011711 | CHIC2    | 0,515 |
| ENSOCUG00000013534 | ENPP2    | 0,514 |
| ENSOCUG00000024644 | H3F3B    | 0,512 |
| ENSOCUG00000014367 | SGK1     | 0,510 |
| ENSOCUG00000004184 | SLC39A8  | 0,507 |
| ENSOCUG00000016535 | RAP1GDS1 | 0,507 |

|                    |          |       |
|--------------------|----------|-------|
| ENSOCUG00000016313 | TDG      | 0,505 |
| ENSOCUG00000011564 | RFX5     | 0,504 |
| ENSOCUG00000007498 | TIMM17A  | 0,500 |
| ENSOCUG00000012016 | SEMA3D   | 0,498 |
| ENSOCUG00000014454 | PARP8    | 0,496 |
| ENSOCUG00000006034 | FHL1     | 0,494 |
| ENSOCUG00000016164 | CYP1B1   | 0,492 |
| ENSOCUG00000013099 | SLC35F5  | 0,492 |
| ENSOCUG00000025029 | CSF1     | 0,491 |
| ENSOCUG00000002260 | ACSS2    | 0,490 |
| ENSOCUG00000014125 | PGM5     | 0,490 |
| ENSOCUG00000015049 | DTX4     | 0,483 |
| ENSOCUG00000021633 | LIMS2    | 0,479 |
| ENSOCUG00000015970 | DENND1B  | 0,477 |
| ENSOCUG00000007631 | GPM6A    | 0,476 |
| ENSOCUG00000005203 | PHTF2    | 0,471 |
| ENSOCUG00000015544 | CLMP     | 0,469 |
| ENSOCUG00000023110 | BC026585 | 0,469 |
| ENSOCUG00000007922 | ST8SIA4  | 0,469 |
| ENSOCUG00000008667 | TYMS     | 0,469 |
| ENSOCUG00000000697 | ELP2     | 0,468 |
| ENSOCUG00000011737 | AMN1     | 0,467 |
| ENSOCUG00000017118 | ADIPOR2  | 0,467 |
| ENSOCUG00000012850 | MIEF1    | 0,467 |
| ENSOCUG00000002674 | KCNG3    | 0,466 |
| ENSOCUG00000009057 | PCDH18   | 0,466 |
| ENSOCUG00000017858 | CLDND1   | 0,465 |
| ENSOCUG00000001994 | LRRC40   | 0,464 |
| ENSOCUG00000005952 | BTBD10   | 0,462 |
| ENSOCUG00000005022 | APEX1    | 0,458 |
| ENSOCUG00000015257 | PSMB4    | 0,457 |
| ENSOCUG00000003383 | MGAT4A   | 0,450 |
| ENSOCUG00000007520 | INTS14   | 0,450 |
| ENSOCUG00000014269 | DAD1     | 0,446 |
| ENSOCUG00000011469 | ELOVL5   | 0,446 |
| ENSOCUG00000014201 | WDYHV1   | 0,441 |
| ENSOCUG00000008471 | RANBP6   | 0,436 |
| ENSOCUG00000021965 | TMEM150C | 0,435 |
| ENSOCUG00000007422 | TBX20    | 0,431 |
| ENSOCUG00000029440 | PCNX4    | 0,431 |
| ENSOCUG00000006537 | POP5     | 0,430 |
| ENSOCUG00000017062 | ROMO1    | 0,427 |

|                    |          |       |
|--------------------|----------|-------|
| ENSOCUG00000002671 | IDH1     | 0,427 |
| ENSOCUG00000011782 | MIPEP    | 0,422 |
| ENSOCUG00000005779 | ACTR1A   | 0,418 |
| ENSOCUG00000006090 | ATP5B    | 0,418 |
| ENSOCUG00000017609 | ERMP1    | 0,417 |
| ENSOCUG00000004511 | HSPB8    | 0,411 |
| ENSOCUG00000016236 | COL15A1  | 0,411 |
| ENSOCUG00000007781 | POLDIP2  | 0,409 |
| ENSOCUG00000000187 | CKAP4    | 0,407 |
| ENSOCUG00000022653 | PISD     | 0,403 |
| ENSOCUG00000008223 | BTG1     | 0,397 |
| ENSOCUG00000004472 | PLPP1    | 0,395 |
| ENSOCUG00000016992 | MTMR9    | 0,394 |
| ENSOCUG00000028052 | AMOTL2   | 0,393 |
| ENSOCUG00000009065 | HNMT     | 0,392 |
| ENSOCUG00000006192 | FOCAD    | 0,392 |
| ENSOCUG00000015348 | DAZAP2   | 0,391 |
| ENSOCUG00000003163 | VCL      | 0,382 |
| ENSOCUG00000013512 | NDUFS2   | 0,382 |
| ENSOCUG00000009383 | CFL2     | 0,370 |
| ENSOCUG00000009263 | NAPB     | 0,370 |
| ENSOCUG00000005809 | FKTN     | 0,369 |
| ENSOCUG00000006969 | DCN      | 0,367 |
| ENSOCUG00000017242 | PDGFC    | 0,364 |
| ENSOCUG00000027511 | BCAP29   | 0,360 |
| ENSOCUG00000014042 | SNRPB    | 0,359 |
| ENSOCUG00000001464 | UBA2     | 0,357 |
| ENSOCUG00000014879 | FEZ2     | 0,356 |
| ENSOCUG00000009586 | TTC27    | 0,355 |
| ENSOCUG00000012053 | PPIC     | 0,353 |
| ENSOCUG00000012549 | MEX3C    | 0,350 |
| ENSOCUG00000017454 | NMD3     | 0,349 |
| ENSOCUG00000001456 | EIF4E    | 0,348 |
| ENSOCUG00000029317 | C1orf123 | 0,343 |
| ENSOCUG00000005284 | IGSF3    | 0,341 |
| ENSOCUG00000008796 | FAM46A   | 0,340 |
| ENSOCUG00000012735 | COQ10B   | 0,334 |
| ENSOCUG00000012900 | RORA     | 0,331 |
| ENSOCUG00000006637 | SLC23A2  | 0,326 |
| ENSOCUG00000002129 | CCNG1    | 0,318 |
| ENSOCUG00000008664 | RABGAP1L | 0,314 |
| ENSOCUG00000005664 | GNPAT    | 0,313 |

|                     |          |       |
|---------------------|----------|-------|
| ENSOCUG0000001081   | WWP1     | 0,310 |
| ENSOCUG00000015714  | TCP11L2  | 0,309 |
| ENSOCUG00000000898  | GPHN     | 0,306 |
| ENSOCUG00000012609  | FBXL17   | 0,304 |
| ENSOCUG00000015579  | UAP1     | 0,304 |
| ENSOCUG00000005474  | SGCB     | 0,303 |
| ENSOCUG00000002094  | LANCL2   | 0,303 |
| ENSOCUG00000000012  | HADHB    | 0,303 |
| ENSOCUG00000001651  | LNPEP    | 0,301 |
| ENSOCUG00000017572  | PPP2R5A  | 0,300 |
| ENSOCUG00000015960  | ACO1     | 0,299 |
| ENSOCUG00000004353  | WDFY1    | 0,298 |
| ENSOCUG00000008140  | TTLL7    | 0,298 |
| ENSOCUG00000008514  | TBCK     | 0,297 |
| ENSOCUG00000015259  | ATP6AP2  | 0,297 |
| ENSOCUG00000004139  | SF3B3    | 0,295 |
| ENSOCUG00000014563  | PRKCI    | 0,294 |
| ENSOCUG00000005951  | PRDX1    | 0,293 |
| ENSOCUG00000014644  | PLA2G4A  | 0,292 |
| ENSOCUG00000001179  | ARHGEF26 | 0,285 |
| ENSOCUG00000007394  | ADCY6    | 0,276 |
| ENSOCUG00000014244  | DBT      | 0,275 |
| ENSOCUG00000014124  | SENP5    | 0,272 |
| ENSOCUG00000001384  | RTTN     | 0,267 |
| ENSOCUG00000011847  | SLC25A3  | 0,267 |
| ENSOCUG00000009878  | XIAP     | 0,265 |
| ENSOCUG000000021896 | EIF5     | 0,264 |
| ENSOCUG00000013843  | STAU2    | 0,264 |
| ENSOCUG00000001595  | CRIM1    | 0,261 |
| ENSOCUG00000009275  | PPP1CC   | 0,260 |
| ENSOCUG00000013642  | DOCK11   | 0,260 |
| ENSOCUG00000005970  | COPG1    | 0,258 |
| ENSOCUG00000010907  | CUL5     | 0,257 |
| ENSOCUG00000017741  | HIF1A    | 0,256 |
| ENSOCUG000000026586 | FEM1B    | 0,255 |
| ENSOCUG00000003468  | CDC37L1  | 0,253 |
| ENSOCUG00000002236  | KIAA0355 | 0,251 |
| ENSOCUG000000023650 | CAMK2D   | 0,247 |
| ENSOCUG00000010349  | HIBADH   | 0,246 |
| ENSOCUG00000012358  | ATP11B   | 0,246 |
| ENSOCUG00000005590  | CBLB     | 0,241 |
| ENSOCUG00000017199  | CCT2     | 0,241 |

|                    |         |       |
|--------------------|---------|-------|
| ENSOCUG00000014519 | SYNRG   | 0,239 |
| ENSOCUG00000008496 | GHR     | 0,237 |
| ENSOCUG00000009943 | SLC38A2 | 0,236 |
| ENSOCUG00000002984 | DOCK9   | 0,234 |
| ENSOCUG00000021959 | HECTD4  | 0,229 |
| ENSOCUG00000007785 | MCFD2   | 0,228 |
| ENSOCUG00000006220 | CLCN3   | 0,228 |
| ENSOCUG00000001043 | FERMT2  | 0,224 |
| ENSOCUG00000012926 | ANAPC1  | 0,217 |
| ENSOCUG00000015832 | OPA1    | 0,213 |
| ENSOCUG00000011290 | SMAD2   | 0,211 |
| ENSOCUG00000001328 | VPS13A  | 0,205 |
| ENSOCUG00000006592 | EIF2S3  | 0,200 |
| ENSOCUG00000008568 | ANKRD28 | 0,196 |
| ENSOCUG00000013326 | EIF4G2  | 0,192 |
| ENSOCUG00000010932 | GPBP1   | 0,192 |
| ENSOCUG00000000097 | DSTYK   | 0,190 |
| ENSOCUG00000008549 | UBR5    | 0,186 |
| ENSOCUG00000008544 | ADAR    | 0,183 |
| ENSOCUG00000015046 | LRPPRC  | 0,181 |
| ENSOCUG00000017135 | SLC30A9 | 0,177 |
| ENSOCUG00000002801 | VPS13C  | 0,176 |
| ENSOCUG00000008986 | SBF2    | 0,175 |
| ENSOCUG00000017465 | UBE3A   | 0,174 |
| ENSOCUG00000010536 | RALGAPB | 0,166 |
| ENSOCUG00000010660 | CUL3    | 0,163 |
| ENSOCUG00000004696 | PSME4   | 0,163 |
| ENSOCUG00000003125 | TRPM7   | 0,154 |
| ENSOCUG00000014986 | ASH1L   | -0,12 |
| ENSOCUG00000014261 | TDRD3   | -0,17 |
| ENSOCUG00000003956 | MAP4    | -0,17 |
| ENSOCUG00000016984 | WWC2    | -0,17 |
| ENSOCUG00000025154 | MIA3    | -0,18 |
| ENSOCUG00000006922 | JMJD1C  | -0,18 |
| ENSOCUG00000011652 | RBM5    | -0,19 |
| ENSOCUG00000017910 | ZFH3    | -0,19 |
| ENSOCUG00000010089 | RPL5    | -0,19 |
| ENSOCUG00000022799 | WASHC2  | -0,19 |
| ENSOCUG00000004220 | ERP44   | -0,20 |
| ENSOCUG00000010714 | SENP6   | -0,20 |
| ENSOCUG00000005000 | TMX3    | -0,20 |
| ENSOCUG00000004678 | PHF14   | -0,21 |



|                    |          |       |
|--------------------|----------|-------|
| ENSOCUG00000013018 | SMG6     | -0,21 |
| ENSOCUG00000006975 | NR2C2    | -0,22 |
| ENSOCUG00000005930 | ZFPM2    | -0,23 |
| ENSOCUG00000008794 | RPL4     | -0,23 |
| ENSOCUG00000000789 | EPC1     | -0,23 |
| ENSOCUG00000011937 | KIF3A    | -0,23 |
| ENSOCUG00000013120 | PHC3     | -0,23 |
| ENSOCUG00000008879 | ARID1B   | -0,23 |
| ENSOCUG00000007964 | TBC1D4   | -0,23 |
| ENSOCUG00000017317 | CDC42BPA | -0,24 |
| ENSOCUG00000011770 | RPRD2    | -0,24 |
| ENSOCUG00000008127 | CALD1    | -0,24 |
| ENSOCUG00000007152 | PAXBP1   | -0,24 |
| ENSOCUG00000004290 | CEP290   | -0,24 |
| ENSOCUG00000023028 | UBTF     | -0,24 |
| ENSOCUG00000002159 | PTPN12   | -0,24 |
| ENSOCUG00000014482 | PLXDC2   | -0,24 |
| ENSOCUG00000011761 | SEPT8    | -0,24 |
| ENSOCUG00000004545 | STK3     | -0,25 |
| ENSOCUG00000013128 | NKTR     | -0,25 |
| ENSOCUG00000014284 | TMEM131  | -0,25 |
| ENSOCUG00000013042 | SMARCA5  | -0,25 |
| ENSOCUG00000014822 | FAF2     | -0,25 |
| ENSOCUG00000009229 | IRF2     | -0,25 |
| ENSOCUG00000010618 | ANK2     | -0,26 |
| ENSOCUG00000010191 | GON4I    | -0,26 |
| ENSOCUG00000014557 | CEP57    | -0,26 |
| ENSOCUG00000024336 | SCARNA7  | -0,26 |
| ENSOCUG00000000463 | GTF3C3   | -0,26 |
| ENSOCUG00000003928 | SEPT6    | -0,27 |
| ENSOCUG00000003336 | RPS6     | -0,27 |
| ENSOCUG00000001742 | CASP8AP2 | -0,27 |
| ENSOCUG00000003637 | CGNL1    | -0,27 |
| ENSOCUG00000004386 | NFAT5    | -0,27 |
| ENSOCUG00000010886 | NUP107   | -0,27 |
| ENSOCUG00000007909 | BAG6     | -0,27 |
| ENSOCUG00000029606 | ZNF345   | -0,27 |
| ENSOCUG00000012546 | ZNF462   | -0,29 |
| ENSOCUG00000012886 | SMG5     | -0,29 |
| ENSOCUG00000011681 | GNAI2    | -0,29 |
| ENSOCUG00000002220 | P2RX4    | -0,30 |
| ENSOCUG00000002325 | ZNF609   | -0,30 |

|                    |         |       |
|--------------------|---------|-------|
| ENSOCUG00000011208 | PCYOX1  | -0,30 |
| ENSOCUG00000005724 | TTC1    | -0,30 |
| ENSOCUG00000023611 | WDR45   | -0,31 |
| ENSOCUG00000017108 | ASXL2   | -0,31 |
| ENSOCUG00000007320 | HMG2    | -0,31 |
| ENSOCUG00000005045 | SYNE2   | -0,32 |
| ENSOCUG00000005057 | IGF2BP2 | -0,32 |
| ENSOCUG00000006678 | JAM2    | -0,33 |
| ENSOCUG00000010353 | RBM12B  | -0,33 |
| ENSOCUG00000016020 | GTF2E2  | -0,33 |
| ENSOCUG00000002363 | CWC22   | -0,34 |
| ENSOCUG00000013733 | USP53   | -0,34 |
| ENSOCUG00000010670 | ZNF436  | -0,34 |
| ENSOCUG00000010492 | ETS1    | -0,35 |
| ENSOCUG00000029299 | CHD3    | -0,35 |
| ENSOCUG00000007723 | NCK1    | -0,35 |
| ENSOCUG00000009173 | RBM34   | -0,35 |
| ENSOCUG00000015776 | GOLGA5  | -0,36 |
| ENSOCUG00000009691 | PSMD3   | -0,36 |
| ENSOCUG00000015881 | SDCCAG8 | -0,36 |
| ENSOCUG00000013378 | PAK1IP1 | -0,36 |
| ENSOCUG00000005242 | QDPR    | -0,37 |
| ENSOCUG00000002155 | SUPT5H  | -0,37 |
| ENSOCUG00000010501 | SH3BP5  | -0,37 |
| ENSOCUG00000007043 | TAOK3   | -0,38 |
| ENSOCUG00000025492 | EID1    | -0,38 |
| ENSOCUG00000029141 | PCNP    | -0,38 |
| ENSOCUG00000014477 | ELK4    | -0,38 |
| ENSOCUG00000014859 | RERE    | -0,38 |
| ENSOCUG00000008142 | TCF7L2  | -0,39 |
| ENSOCUG00000002398 | TBC1D8  | -0,39 |
| ENSOCUG00000017019 | CDH11   | -0,39 |
| ENSOCUG00000008067 | EEF2K   | -0,39 |
| ENSOCUG00000013425 | HEBP2   | -0,40 |
| ENSOCUG00000011096 | MGAT5   | -0,40 |
| ENSOCUG00000015875 | RFTN1   | -0,40 |
| ENSOCUG00000015569 | ANKS1A  | -0,41 |
| ENSOCUG00000000510 | PPRC1   | -0,42 |
| ENSOCUG00000008550 | ZHX2    | -0,42 |
| ENSOCUG00000013619 | WDR44   | -0,43 |
| ENSOCUG00000017463 | GAB2    | -0,43 |
| ENSOCUG00000005020 | OSGEP   | -0,43 |

|                     |          |       |
|---------------------|----------|-------|
| ENSOCUG00000010820  | MAML2    | -0,43 |
| ENSOCUG00000006424  | CEP152   | -0,43 |
| ENSOCUG00000010937  | SOCS2    | -0,44 |
| ENSOCUG00000006961  | FGD5     | -0,44 |
| ENSOCUG00000008454  | CEP112   | -0,44 |
| ENSOCUG00000008072  | STX18    | -0,44 |
| ENSOCUG00000029476  | Gm4924   | -0,44 |
| ENSOCUG00000002105  | AFF1     | -0,44 |
| ENSOCUG00000020986  | RNF25    | -0,44 |
| ENSOCUG00000002673  | AKAP12   | -0,44 |
| ENSOCUG00000002677  | ATXN2L   | -0,45 |
| ENSOCUG00000000380  | WNT5A    | -0,45 |
| ENSOCUG00000010022  | E2F4     | -0,45 |
| ENSOCUG00000011590  | RXRΒ     | -0,45 |
| ENSOCUG00000012510  | HOMEZ    | -0,45 |
| ENSOCUG00000008416  | ZNF398   | -0,45 |
| ENSOCUG00000007362  | PRKCA    | -0,46 |
| ENSOCUG00000012045  | PTPRB    | -0,46 |
| ENSOCUG00000015984  | CASC1    | -0,46 |
| ENSOCUG00000008718  | TMEM231  | -0,47 |
| ENSOCUG00000016598  | PROCR    | -0,47 |
| ENSOCUG00000001489  | ADGRF5   | -0,48 |
| ENSOCUG00000004565  | ABCF3    | -0,48 |
| ENSOCUG00000011338  | TRIM25   | -0,49 |
| ENSOCUG00000008374  | UNC119B  | -0,49 |
| ENSOCUG00000002631  | MSANTD2  | -0,50 |
| ENSOCUG00000002468  | KIF20B   | -0,50 |
| ENSOCUG00000012279  | C14orf37 | -0,51 |
| ENSOCUG00000008572  | RBPM5    | -0,51 |
| ENSOCUG00000002310  | TNFAIP3  | -0,51 |
| ENSOCUG000000026517 | RAI2     | -0,51 |
| ENSOCUG00000003698  | KLF3     | -0,52 |
| ENSOCUG00000015077  | SCLT1    | -0,52 |
| ENSOCUG000000025214 | GZF1     | -0,52 |
| ENSOCUG00000004762  | SYNJ2    | -0,52 |
| ENSOCUG00000015469  | CTSO     | -0,53 |
| ENSOCUG00000003495  | MKNK1    | -0,54 |
| ENSOCUG00000010633  | HMOX1    | -0,54 |
| ENSOCUG00000008461  | PALB2    | -0,54 |
| ENSOCUG00000000633  | DLGAP4   | -0,56 |
| ENSOCUG000000022117 | RREB1    | -0,56 |
| ENSOCUG00000000574  | PLEKHH1  | -0,56 |

|                    |              |       |
|--------------------|--------------|-------|
| ENSOCUG0000007231  | EMCN         | -0,56 |
| ENSOCUG0000002395  | USP21        | -0,56 |
| ENSOCUG00000016464 | TYW5         | -0,57 |
| ENSOCUG00000008277 | FNBP1L       | -0,57 |
| ENSOCUG00000010454 | CPEB3        | -0,58 |
| ENSOCUG00000014141 | TRIM39-RPP21 | -0,58 |
| ENSOCUG00000026766 | SCNM1        | -0,59 |
| ENSOCUG00000016557 | TXNDC17      | -0,60 |
| ENSOCUG00000014601 | CD59         | -0,60 |
| ENSOCUG00000013467 | RNF150       | -0,61 |
| ENSOCUG00000014289 | MYC          | -0,61 |
| ENSOCUG00000014657 | EFEMP1       | -0,62 |
| ENSOCUG00000012502 | GBP4         | -0,62 |
| ENSOCUG00000002117 | PRR3         | -0,63 |
| ENSOCUG00000016078 | METTL6       | -0,63 |
| ENSOCUG00000029649 | HEY2         | -0,63 |
| ENSOCUG00000001879 | SPAG1        | -0,63 |
| ENSOCUG00000014876 | ARL5B        | -0,64 |
| ENSOCUG00000010972 | RLA-A1       | -0,64 |
| ENSOCUG00000014919 | SNX12        | -0,64 |
| ENSOCUG00000010544 | CROT         | -0,64 |
| ENSOCUG00000001039 | SYNGAP1      | -0,65 |
| ENSOCUG00000027759 | NOS1AP       | -0,65 |
| ENSOCUG00000015293 | PORCN        | -0,65 |
| ENSOCUG00000016938 | UBXN11       | -0,65 |
| ENSOCUG00000016744 | SPOCK2       | -0,65 |
| ENSOCUG00000015802 | FBXW10       | -0,66 |
| ENSOCUG00000017288 | CYB5D1       | -0,66 |
| ENSOCUG00000024926 | NMRAL1       | -0,66 |
| ENSOCUG00000017039 | RPUSD4       | -0,66 |
| ENSOCUG00000008192 | SERTAD2      | -0,68 |
| ENSOCUG00000013722 | PAWR         | -0,69 |
| ENSOCUG00000004283 | ZNF483       | -0,70 |
| ENSOCUG00000007443 | RAB11FIP4    | -0,71 |
| ENSOCUG00000015220 | PECAM1       | -0,71 |
| ENSOCUG00000027415 | SP2          | -0,71 |
| ENSOCUG00000006791 | FAM161B      | -0,71 |
| ENSOCUG00000000812 | CCDC39       | -0,72 |
| ENSOCUG00000001306 | SPTLC3       | -0,72 |
| ENSOCUG00000024218 | NFKBIB       | -0,73 |
| ENSOCUG00000014753 | TMEM218      | -0,73 |
| ENSOCUG00000004231 | BACH2        | -0,73 |

|                    |                |       |
|--------------------|----------------|-------|
| ENSOCUG00000028355 | SCARNA1        | -0,74 |
| ENSOCUG00000010935 | CLEC4A         | -0,75 |
| ENSOCUG00000007489 | SHISA4         | -0,76 |
| ENSOCUG00000024015 | RAD9A          | -0,76 |
| ENSOCUG00000012640 | CGN            | -0,78 |
| ENSOCUG00000001685 | SLC7A8         | -0,79 |
| ENSOCUG00000015859 | PRKCH          | -0,81 |
| ENSOCUG00000015295 | WDR54          | -0,81 |
| ENSOCUG00000004261 | SLC35G1        | -0,81 |
| ENSOCUG00000013552 | KCNN3          | -0,83 |
| ENSOCUG00000027066 | RGS2           | -0,85 |
| ENSOCUG00000008922 | FGR            | -0,89 |
| ENSOCUG00000029595 | AABR07053179.1 | -0,89 |
| ENSOCUG00000009553 | IQUB           | -0,90 |
| ENSOCUG00000001473 | S100B          | -0,92 |
| ENSOCUG00000002478 | TCEAL3         | -0,92 |
| ENSOCUG00000025132 | RPL23A         | -0,93 |
| ENSOCUG00000011541 | ILDR1          | -0,93 |
| ENSOCUG00000015667 | SH3RF2         | -0,94 |
| ENSOCUG00000021292 | RPL38          | -0,94 |
| ENSOCUG00000000779 | RSPO2          | -0,97 |
| ENSOCUG00000029564 | WIPF2          | -0,99 |
| ENSOCUG00000017120 | PDK4           | -1,00 |
| ENSOCUG00000019175 | SNORA7         | -1,03 |
| ENSOCUG00000000191 | YPEL4          | -1,03 |
| ENSOCUG00000018491 | let-7d         | -1,22 |
| ENSOCUG00000026507 | Hist1h3g       | -1,23 |
| ENSOCUG00000010624 | POLR3G         | -1,27 |
| ENSOCUG00000001162 | SERINC4        | -1,28 |
| ENSOCUG00000019702 | SNORD59        | -1,29 |
| ENSOCUG00000014718 | NOS1           | -1,30 |
| ENSOCUG00000016145 | IL17B          | -1,33 |
| ENSOCUG00000024432 | IFGGA1         | -1,34 |
| ENSOCUG00000017251 | GBP1           | -1,36 |
| ENSOCUG00000000621 | INHBA          | -1,37 |
| ENSOCUG00000018323 | let-7a-1       | -1,37 |
| ENSOCUG00000022434 | CDCA3          | -1,52 |
| ENSOCUG00000029211 | ZSCAN12        | -1,56 |
| ENSOCUG00000018518 | SNORD49        | -1,57 |
| ENSOCUG00000018370 | SNORD56        | -1,57 |
| ENSOCUG00000022445 | MYH2           | -1,59 |
| ENSOCUG00000022248 | RUFY4          | -1,63 |

|                                  |                |              |
|----------------------------------|----------------|--------------|
| ENSOCUG00000006847               | CHMP4C         | -1,65        |
| ENSOCUG00000019315               | SNORD61        | -1,71        |
| ENSOCUG00000025588               | FAM173B        | -1,73        |
| ENSOCUG00000008034               | TTC30A         | -1,75        |
| ENSOCUG00000020068               | SNORD110       | -1,86        |
| ENSOCUG00000020076               | SNORD75        | -1,92        |
| ENSOCUG00000014915               | STAC2          | -1,94        |
| ENSOCUG00000028024               | IRGM           | -2,16        |
| ENSOCUG00000003049               | COL17A1        | -2,24        |
| ENSOCUG00000017082               | IGSF11         | -2,63        |
| <b>DEGS only dexfenfluramine</b> |                |              |
| <b>ID</b>                        | <b>GENE ID</b> | <b>logFC</b> |
| ENSOCUG00000028463               | SCARNA20       | 2,187704     |
| ENSOCUG00000011440               | GRID2          | 2,176072     |
| ENSOCUG00000013625               | PRSS12         | 2,133391     |
| ENSOCUG00000021631               | SNORA53        | 2,043845     |
| ENSOCUG00000001739               | CADM2          | 1,910987     |
| ENSOCUG00000022661               | RPSA           | 1,709552     |
| ENSOCUG00000000724               | SLC7A7         | 1,687704     |
| ENSOCUG00000010041               | FAM189B        | 1,567685     |
| ENSOCUG00000006388               | ANKRD13D       | 1,544701     |
| ENSOCUG00000010077               | KCTD19         | 1,529498     |
| ENSOCUG00000002994               | CCDC3          | 1,511807     |
| ENSOCUG00000012865               | GRID1          | 1,502851     |
| ENSOCUG00000007289               | PNMA1          | 1,437319     |
| ENSOCUG00000000247               | CHPF2          | 1,425365     |
| ENSOCUG00000011294               | TDH            | 1,389964     |
| ENSOCUG00000013333               | HS3ST3A1       | 1,376829     |
| ENSOCUG00000016772               | DDIT4          | 1,360496     |
| ENSOCUG00000011799               | FAM221A        | 1,323697     |
| ENSOCUG00000000355               | CNTFR          | 1,32075      |
| ENSOCUG00000025012               | ANGPT4         | 1,308579     |
| ENSOCUG00000016289               | HPGD           | 1,301636     |
| ENSOCUG00000003500               | FAM84B         | 1,287007     |
| ENSOCUG00000023919               | TAGLN          | 1,286055     |
| ENSOCUG00000005539               | NLGN2          | 1,283886     |
| ENSOCUG00000019359               | SNORA61        | 1,279636     |
| ENSOCUG00000021036               | NCKIPSD        | 1,2154       |
| ENSOCUG00000002250               | GGT7           | 1,213969     |
| ENSOCUG00000009025               | PARD6A         | 1,20978      |
| ENSOCUG00000005593               | FXYD6          | 1,208708     |
| ENSOCUG00000002733               | CACNA1G        | 1,206613     |

|                    |          |          |
|--------------------|----------|----------|
| ENSOCUG0000007620  | CYP26B1  | 1,206403 |
| ENSOCUG00000013880 | SORCS3   | 1,19494  |
| ENSOCUG00000017309 | HTR4     | 1,194316 |
| ENSOCUG00000000657 | KCNH1    | 1,194228 |
| ENSOCUG00000024804 | BTBD19   | 1,190608 |
| ENSOCUG00000002851 | SH2B3    | 1,189519 |
| ENSOCUG00000016039 | ZNF396   | 1,173906 |
| ENSOCUG00000011507 | RNF185   | 1,167419 |
| ENSOCUG00000026428 | GHDC     | 1,165074 |
| ENSOCUG00000003688 | CPPED1   | 1,160335 |
| ENSOCUG00000026933 | NPTXR    | 1,150533 |
| ENSOCUG00000010661 | PPIL3    | 1,109929 |
| ENSOCUG00000004487 | DRP2     | 1,098822 |
| ENSOCUG00000011212 | TP53I3   | 1,087849 |
| ENSOCUG00000014979 | MBNL3    | 1,085538 |
| ENSOCUG00000006895 | GFAP     | 1,085483 |
| ENSOCUG00000028344 | SCARNA11 | 1,06768  |
| ENSOCUG00000022769 | ZFH3     | 1,058024 |
| ENSOCUG00000017484 | PNPO     | 1,046557 |
| ENSOCUG00000026592 | RPL13A   | 1,044945 |
| ENSOCUG00000001302 | MICALCL  | 1,03799  |
| ENSOCUG00000009360 | MST1R    | 1,031201 |
| ENSOCUG00000026354 | PGF      | 1,029031 |
| ENSOCUG00000015745 | RPUSD2   | 1,017141 |
| ENSOCUG00000013688 | TNFAIP6  | 1,012661 |
| ENSOCUG00000002630 | HAPLN1   | 1,00422  |
| ENSOCUG00000001923 | CXCR4    | 1,003341 |
| ENSOCUG00000015723 | SLC15A3  | 0,995412 |
| ENSOCUG00000008824 | LRGUK    | 0,982778 |
| ENSOCUG00000013686 | WNT5B    | 0,971545 |
| ENSOCUG00000025460 | RASSF1   | 0,971083 |
| ENSOCUG00000006326 | ALG14    | 0,95756  |
| ENSOCUG00000026184 | VSNL1    | 0,942036 |
| ENSOCUG00000005204 | RGS4     | 0,940263 |
| ENSOCUG00000010643 | KCNMB3   | 0,937813 |
| ENSOCUG00000016970 | DNHD1    | 0,937166 |
| ENSOCUG00000006393 | SSH3     | 0,932521 |
| ENSOCUG00000003347 | SEMA4C   | 0,932129 |
| ENSOCUG00000010111 | P4HA3    | 0,927842 |
| ENSOCUG00000004385 | KCNV2    | 0,927347 |
| ENSOCUG00000007084 | CHRD     | 0,914794 |
| ENSOCUG00000011348 | CHPF     | 0,895211 |

|                    |          |          |
|--------------------|----------|----------|
| ENSOCUG00000017628 | CFAP54   | 0,890077 |
| ENSOCUG00000003523 | SYT6     | 0,886176 |
| ENSOCUG00000016354 | IL6R     | 0,88171  |
| ENSOCUG00000015143 | C1QB     | 0,876799 |
| ENSOCUG00000022879 | NME7     | 0,870249 |
| ENSOCUG00000023498 | TBX2     | 0,85213  |
| ENSOCUG00000010390 | TMEM67   | 0,845033 |
| ENSOCUG00000013309 | TRHDE    | 0,840908 |
| ENSOCUG00000005913 | CHCHD7   | 0,840828 |
| ENSOCUG00000007360 | PTS      | 0,839117 |
| ENSOCUG00000014422 | HIST1H1C | 0,834149 |
| ENSOCUG00000021324 | NDP      | 0,831953 |
| ENSOCUG00000000638 | GLI2     | 0,826072 |
| ENSOCUG00000007767 | SLC11A2  | 0,816802 |
| ENSOCUG00000012166 | FMNL1    | 0,813633 |
| ENSOCUG00000003633 | GFRA1    | 0,810722 |
| ENSOCUG00000009729 | RNF43    | 0,810089 |
| ENSOCUG00000027266 | KCTD21   | 0,80679  |
| ENSOCUG00000017593 | CCDC71   | 0,804068 |
| ENSOCUG00000007583 | TTC39A   | 0,802692 |
| ENSOCUG00000013700 | CTSF     | 0,793458 |
| ENSOCUG00000029716 | ARHGEF17 | 0,791158 |
| ENSOCUG00000010845 | COL4A6   | 0,789933 |
| ENSOCUG00000002486 | COL6A6   | 0,788636 |
| ENSOCUG00000011031 | CDAN1    | 0,785076 |
| ENSOCUG00000000655 | HHAT     | 0,780063 |
| ENSOCUG00000009517 | SLIT2    | 0,775276 |
| ENSOCUG00000004555 | PCDHB4   | 0,773562 |
| ENSOCUG00000009531 | ANGEL1   | 0,76958  |
| ENSOCUG00000002945 | MEOX1    | 0,764491 |
| ENSOCUG00000001599 | FLRT3    | 0,762414 |
| ENSOCUG00000005498 | AGPAT1   | 0,761506 |
| ENSOCUG00000017214 | RIC3     | 0,761151 |
| ENSOCUG00000007827 | SASS6    | 0,748456 |
| ENSOCUG00000003023 | B4GALT7  | 0,742999 |
| ENSOCUG00000012702 | SIGLEC1  | 0,741874 |
| ENSOCUG00000009266 | CAND2    | 0,740735 |
| ENSOCUG00000003323 | ARHGAP28 | 0,740342 |
| ENSOCUG00000011758 | ARHGAP23 | 0,738018 |
| ENSOCUG00000000227 | ASAP3    | 0,735665 |
| ENSOCUG00000010032 | THBS3    | 0,726285 |
| ENSOCUG00000000128 | C21orf91 | 0,726081 |



|                     |          |          |
|---------------------|----------|----------|
| ENSOCUG00000008686  | TNK2     | 0,720308 |
| ENSOCUG00000001278  | INTU     | 0,710513 |
| ENSOCUG00000001086  | RMDN1    | 0,710062 |
| ENSOCUG000000016570 | SLCO1A2  | 0,708425 |
| ENSOCUG00000005524  | TMBIM1   | 0,707062 |
| ENSOCUG000000026758 | SNORA68  | 0,70141  |
| ENSOCUG000000012614 | TXNDC16  | 0,69923  |
| ENSOCUG000000015328 | MOGS     | 0,695901 |
| ENSOCUG00000006557  | H2-T24   | 0,694526 |
| ENSOCUG00000002563  | SAT2     | 0,692537 |
| ENSOCUG000000025261 | WRAP53   | 0,692004 |
| ENSOCUG000000012868 | CHST10   | 0,69164  |
| ENSOCUG000000017934 | ACVR1B   | 0,691018 |
| ENSOCUG000000026610 | TMEM100  | 0,689379 |
| ENSOCUG000000010053 | SLC9A5   | 0,686704 |
| ENSOCUG000000012928 | ENPP4    | 0,686096 |
| ENSOCUG000000015440 | BCAR3    | 0,683642 |
| ENSOCUG000000000312 | IGDCC4   | 0,681519 |
| ENSOCUG000000014499 | CLSTN3   | 0,676194 |
| ENSOCUG000000015928 | Wnk4     | 0,670286 |
| ENSOCUG000000017400 | POP1     | 0,667632 |
| ENSOCUG000000015924 | MCM2     | 0,665836 |
| ENSOCUG000000000960 | SDK2     | 0,662814 |
| ENSOCUG000000004030 | GLIS3    | 0,662539 |
| ENSOCUG000000002341 | CAPG     | 0,660999 |
| ENSOCUG000000008558 | PPM1M    | 0,65884  |
| ENSOCUG000000015807 | TFE3     | 0,656783 |
| ENSOCUG000000008740 | TTI2     | 0,655636 |
| ENSOCUG000000010874 | COL4A5   | 0,655518 |
| ENSOCUG000000002958 | ADCY4    | 0,654483 |
| ENSOCUG000000005579 | ITGB3    | 0,650815 |
| ENSOCUG000000004035 | IRF6     | 0,650495 |
| ENSOCUG000000000927 | ADAMTSL4 | 0,646351 |
| ENSOCUG000000011537 | TTC30B   | 0,646325 |
| ENSOCUG000000007046 | PPIL1    | 0,642667 |
| ENSOCUG000000028187 | SLC41A1  | 0,64086  |
| ENSOCUG000000022299 | PI15     | 0,639318 |
| ENSOCUG000000013427 | DPEP2    | 0,635616 |
| ENSOCUG000000012217 | APCDD1   | 0,633825 |
| ENSOCUG000000026764 | CAVIN1   | 0,633082 |
| ENSOCUG000000017263 | RFL      | 0,632366 |
| ENSOCUG000000009145 | IQCB1    | 0,629998 |

|                    |         |          |
|--------------------|---------|----------|
| ENSOCUG0000000611  | FKBP10  | 0,629411 |
| ENSOCUG0000001915  | PYCR2   | 0,627461 |
| ENSOCUG00000010343 | TRIM27  | 0,626218 |
| ENSOCUG00000003031 | GGH     | 0,62585  |
| ENSOCUG00000027852 | IQSEC2  | 0,625749 |
| ENSOCUG00000005759 | PHGDH   | 0,62387  |
| ENSOCUG00000016160 | ARHGAP1 | 0,623387 |
| ENSOCUG00000013452 | PRTFDC1 | 0,622631 |
| ENSOCUG00000011100 | RANBP17 | 0,620277 |
| ENSOCUG00000005766 | ITPR3   | 0,617908 |
| ENSOCUG00000013464 | MYSM10  | 0,617272 |
| ENSOCUG00000008821 | YIPF1   | 0,616523 |
| ENSOCUG00000010123 | CD9     | 0,61284  |
| ENSOCUG00000009342 | THAP11  | 0,60598  |
| ENSOCUG00000029380 | ZNF311  | 0,605541 |
| ENSOCUG00000029449 | NUP37   | 0,605147 |
| ENSOCUG00000003015 | IMPDH1  | 0,604133 |
| ENSOCUG00000016536 | PARP11  | 0,602368 |
| ENSOCUG00000023006 | RAB34   | 0,600104 |
| ENSOCUG00000007851 | PLBD2   | 0,597521 |
| ENSOCUG00000017352 | ESYT1   | 0,59698  |
| ENSOCUG00000001279 | TSPAN2  | 0,595806 |
| ENSOCUG00000008578 | DYNLRB2 | 0,59079  |
| ENSOCUG00000023782 | IL11RA  | 0,590695 |
| ENSOCUG00000009622 | PDLIM7  | 0,590283 |
| ENSOCUG00000023236 | TTLL4   | 0,587257 |
| ENSOCUG00000002350 | SMG8    | 0,585428 |
| ENSOCUG00000026532 | SCARA5  | 0,584636 |
| ENSOCUG00000010095 | ZNF18   | 0,582159 |
| ENSOCUG00000015630 | ZNF76   | 0,579108 |
| ENSOCUG00000013982 | ADSS    | 0,578548 |
| ENSOCUG00000012438 | NBEAL2  | 0,577229 |
| ENSOCUG00000014527 | CTSC    | 0,575122 |
| ENSOCUG00000011883 | COG1    | 0,569802 |
| ENSOCUG00000012374 | FRMPD3  | 0,562932 |
| ENSOCUG00000014077 | LTBP2   | 0,561393 |
| ENSOCUG00000026693 | TNS2    | 0,560735 |
| ENSOCUG00000000826 | DENND6A | 0,558993 |
| ENSOCUG00000007609 | PBX1    | 0,557903 |
| ENSOCUG00000003679 | GSTA1   | 0,55615  |
| ENSOCUG00000005190 | DHCR24  | 0,555441 |
| ENSOCUG00000012115 | AXIN2   | 0,552092 |

|                    |          |          |
|--------------------|----------|----------|
| ENSOCUG00000012232 | KIRREL1  | 0,552028 |
| ENSOCUG00000012661 | PTPRU    | 0,549824 |
| ENSOCUG00000013993 | PCDHGC5  | 0,549132 |
| ENSOCUG00000012063 | JUP      | 0,548108 |
| ENSOCUG00000003594 | OLFML2B  | 0,546848 |
| ENSOCUG00000003174 | FARP1    | 0,546592 |
| ENSOCUG00000013176 | SMO      | 0,544871 |
| ENSOCUG00000005109 | MMP19    | 0,542669 |
| ENSOCUG00000029415 | RNF38    | 0,54117  |
| ENSOCUG00000010372 | MAP3K21  | 0,53866  |
| ENSOCUG00000014489 | TMBIM4   | 0,538212 |
| ENSOCUG00000004708 | DCTD     | 0,537842 |
| ENSOCUG00000000832 | ABHD6    | 0,536907 |
| ENSOCUG00000010087 | SPATA13  | 0,535241 |
| ENSOCUG00000007510 | LRIG1    | 0,535061 |
| ENSOCUG00000002730 | LRRC1    | 0,532145 |
| ENSOCUG00000014984 | POLR2C   | 0,529403 |
| ENSOCUG00000012244 | PLIN2    | 0,526587 |
| ENSOCUG00000015575 | GABBR1   | 0,525154 |
| ENSOCUG00000013581 | GGPS1    | 0,524517 |
| ENSOCUG00000001446 | ZDHHC20  | 0,521623 |
| ENSOCUG00000002267 | GSS      | 0,521384 |
| ENSOCUG00000012916 | P3H3     | 0,520427 |
| ENSOCUG00000011095 | SAP30L   | 0,519317 |
| ENSOCUG00000016385 | CADM3    | 0,518951 |
| ENSOCUG00000026930 | RGL2     | 0,517995 |
| ENSOCUG00000012317 | RNF121   | 0,517465 |
| ENSOCUG00000004406 | FBXL7    | 0,513778 |
| ENSOCUG00000002323 | PATZ1    | 0,511985 |
| ENSOCUG00000011080 | GALNT7   | 0,510451 |
| ENSOCUG00000010218 | CMTR2    | 0,508259 |
| ENSOCUG00000010672 | HS2ST1   | 0,507955 |
| ENSOCUG00000007788 | TTC7A    | 0,507012 |
| ENSOCUG00000000416 | ARMCX2   | 0,502038 |
| ENSOCUG00000015039 | FNDC1    | 0,501947 |
| ENSOCUG00000008730 | LRRK1    | 0,501312 |
| ENSOCUG00000002407 | MFAP5    | 0,50089  |
| ENSOCUG00000017793 | CD38     | 0,500579 |
| ENSOCUG00000012400 | PTH1R    | 0,499459 |
| ENSOCUG00000022838 | RBM14    | 0,498461 |
| ENSOCUG00000017672 | TMEM184B | 0,49636  |
| ENSOCUG00000014468 | C1S      | 0,495449 |

|                     |          |          |
|---------------------|----------|----------|
| ENSOCUG00000011000  | GAS7     | 0,490935 |
| ENSOCUG00000006461  | GALK2    | 0,486389 |
| ENSOCUG00000014193  | TRPM3    | 0,48488  |
| ENSOCUG00000008054  | CYP20A1  | 0,484404 |
| ENSOCUG00000015752  | ACSS3    | 0,48342  |
| ENSOCUG00000012769  | TSC22D1  | 0,483294 |
| ENSOCUG00000017706  | ATL1     | 0,482435 |
| ENSOCUG00000003211  | PHYKPL   | 0,479969 |
| ENSOCUG00000009914  | ARHGEF40 | 0,478647 |
| ENSOCUG00000001754  | FMNL3    | 0,476502 |
| ENSOCUG00000002942  | DHRS1    | 0,4756   |
| ENSOCUG00000010779  | FBXO34   | 0,475271 |
| ENSOCUG00000013015  | IFT122   | 0,47339  |
| ENSOCUG00000011945  | TRMT2B   | 0,472391 |
| ENSOCUG00000009866  | ANKRD29  | 0,471673 |
| ENSOCUG00000011350  | SPON1    | 0,470616 |
| ENSOCUG00000004479  | SLC38A9  | 0,468226 |
| ENSOCUG000000025823 | SUPT4H1  | 0,467436 |
| ENSOCUG00000014539  | KDEL2    | 0,467424 |
| ENSOCUG00000013285  | KAT2A    | 0,467385 |
| ENSOCUG00000004378  | ARRDC3   | 0,467303 |
| ENSOCUG00000015163  | NYNRIN   | 0,467083 |
| ENSOCUG00000011969  | MAPKBP1  | 0,466681 |
| ENSOCUG00000001816  | PLCE1    | 0,463643 |
| ENSOCUG000000024538 | C17orf80 | 0,461145 |
| ENSOCUG00000005271  | PIGN     | 0,458919 |
| ENSOCUG00000000765  | HACL1    | 0,45728  |
| ENSOCUG00000014914  | AEBP1    | 0,457098 |
| ENSOCUG00000012340  | TBC1D8B  | 0,452588 |
| ENSOCUG00000010546  | RPS18    | 0,451895 |
| ENSOCUG00000013363  | STIM1    | 0,451204 |
| ENSOCUG000000024644 | HHT3     | 0,450639 |
| ENSOCUG00000017517  | TMEM68   | 0,450133 |
| ENSOCUG00000004469  | ZDHHC13  | 0,447622 |
| ENSOCUG00000009782  | AP5M1    | 0,447069 |
| ENSOCUG00000006700  | MAN1A1   | 0,446807 |
| ENSOCUG00000008980  | BAHD1    | 0,446297 |
| ENSOCUG00000009709  | MED24    | 0,445637 |
| ENSOCUG00000013453  | HMCN1    | 0,444291 |
| ENSOCUG00000005277  | NOD1     | 0,441568 |
| ENSOCUG00000008284  | CAMLG    | 0,440626 |
| ENSOCUG00000010436  | LEF1     | 0,439436 |

|                    |          |          |
|--------------------|----------|----------|
| ENSOCUG00000012547 | USP54    | 0,438764 |
| ENSOCUG00000005975 | ACTR1B   | 0,437728 |
| ENSOCUG00000010011 | LMNA     | 0,437414 |
| ENSOCUG00000015796 | ANXA4    | 0,436404 |
| ENSOCUG00000005781 | SUFU     | 0,435635 |
| ENSOCUG00000001124 | ZC2HC1A  | 0,435113 |
| ENSOCUG00000023629 | TPCN1    | 0,434526 |
| ENSOCUG00000000476 | FGF2     | 0,431436 |
| ENSOCUG00000026842 | LPAR1    | 0,430614 |
| ENSOCUG00000009340 | ARAP3    | 0,430141 |
| ENSOCUG00000009772 | C8orf76  | 0,429534 |
| ENSOCUG00000011389 | ABCG2    | 0,429516 |
| ENSOCUG00000006022 | MINDY4   | 0,427524 |
| ENSOCUG00000006957 | IL1R1    | 0,427192 |
| ENSOCUG00000001299 | MICAL2   | 0,42603  |
| ENSOCUG00000003993 | RFTN2    | 0,424892 |
| ENSOCUG00000011626 | CAMK1D   | 0,424686 |
| ENSOCUG00000000614 | KLHL11   | 0,421282 |
| ENSOCUG00000002259 | MPZL1    | 0,417902 |
| ENSOCUG00000005447 | ST5      | 0,410446 |
| ENSOCUG00000009891 | SMARCAL1 | 0,409476 |
| ENSOCUG00000020935 | MTCH1    | 0,40827  |
| ENSOCUG00000001429 | MAOA     | 0,407627 |
| ENSOCUG00000002613 | VCAN     | 0,407298 |
| ENSOCUG00000003379 | NUP54    | 0,40598  |
| ENSOCUG00000003187 | REM1     | 0,403482 |
| ENSOCUG00000009694 | SRGAP1   | 0,402915 |
| ENSOCUG00000008171 | GATA2    | 0,400431 |
| ENSOCUG00000017052 | BCOR     | 0,400315 |
| ENSOCUG00000002090 | RASSF2   | 0,397296 |
| ENSOCUG00000010140 | LZTFL1   | 0,396536 |
| ENSOCUG00000016184 | ATL2     | 0,392829 |
| ENSOCUG00000012809 | SLC25A24 | 0,391749 |
| ENSOCUG00000017763 | TLR3     | 0,391284 |
| ENSOCUG00000009284 | KCTD6    | 0,391196 |
| ENSOCUG00000014339 | COMMD7   | 0,385752 |
| ENSOCUG00000027924 | SIRT2    | 0,385651 |
| ENSOCUG00000009222 | VIM      | 0,3853   |
| ENSOCUG00000028186 | IRF9     | 0,384645 |
| ENSOCUG00000001220 | TUBGCP2  | 0,384645 |
| ENSOCUG00000021890 | WBP1L    | 0,384428 |
| ENSOCUG00000001616 | PCSK5    | 0,384291 |

|                    |            |          |
|--------------------|------------|----------|
| ENSOCUG00000010843 | PRKCD      | 0,383542 |
| ENSOCUG00000004686 | TENM4      | 0,383225 |
| ENSOCUG00000008872 | AARS       | 0,382308 |
| ENSOCUG00000009508 | ADPRH      | 0,38199  |
| ENSOCUG00000002180 | DLG5       | 0,379795 |
| ENSOCUG00000001062 | C8orf37    | 0,378868 |
| ENSOCUG00000011893 | GNB5       | 0,378461 |
| ENSOCUG00000001272 | MFSD1      | 0,378024 |
| ENSOCUG00000012337 | COL21A1    | 0,377769 |
| ENSOCUG00000012790 | CAP1       | 0,377753 |
| ENSOCUG00000005078 | STAT5B     | 0,376905 |
| ENSOCUG00000015400 | PTPN14     | 0,376722 |
| ENSOCUG00000010245 | AC022826.2 | 0,375939 |
| ENSOCUG00000005893 | NFIA       | 0,37325  |
| ENSOCUG00000004519 | ERCC8      | 0,372528 |
| ENSOCUG00000017326 | TUBGCP4    | 0,370683 |
| ENSOCUG00000008047 | VWA3A      | 0,370127 |
| ENSOCUG00000004169 | ASAH1      | 0,369248 |
| ENSOCUG00000013024 | NAA16      | 0,366603 |
| ENSOCUG00000029614 | PPM1D      | 0,36522  |
| ENSOCUG00000016320 | ATP8B2     | 0,365074 |
| ENSOCUG00000001386 | CTTNBP2    | 0,364181 |
| ENSOCUG00000017667 | ATP1A2     | 0,36331  |
| ENSOCUG00000029231 | ERGIC1     | 0,362909 |
| ENSOCUG00000006656 | DAAM2      | 0,362701 |
| ENSOCUG00000012639 | LMO4       | 0,360298 |
| ENSOCUG00000008555 | PLEKHM1    | 0,358631 |
| ENSOCUG00000021918 | DGKA       | 0,358117 |
| ENSOCUG00000006096 | ANKRD50    | 0,357316 |
| ENSOCUG00000016720 | SZT2       | 0,357014 |
| ENSOCUG00000017791 | SGPL1      | 0,354548 |
| ENSOCUG00000013175 | FBLN5      | 0,354314 |
| ENSOCUG00000008574 | HDAC5      | 0,347864 |
| ENSOCUG00000007483 | TBC1D12    | 0,347806 |
| ENSOCUG00000006927 | ARHGAP42   | 0,347211 |
| ENSOCUG00000016386 | MBTPS2     | 0,346884 |
| ENSOCUG00000004878 | ORC3       | 0,346357 |
| ENSOCUG00000012643 | OSMR       | 0,344381 |
| ENSOCUG00000012677 | ENTPD1     | 0,340657 |
| ENSOCUG00000005905 | STXBP5     | 0,339064 |
| ENSOCUG00000002396 | PKD2       | 0,337711 |
| ENSOCUG00000005170 | BRWD3      | 0,337622 |

|                    |          |          |
|--------------------|----------|----------|
| ENSOCUG00000017929 | Polr2a   | 0,337177 |
| ENSOCUG00000010430 | KIAA0907 | 0,33665  |
| ENSOCUG00000015035 | HECTD2   | 0,336199 |
| ENSOCUG00000009330 | FMO5     | 0,334799 |
| ENSOCUG00000004135 | GPATCH2L | 0,334648 |
| ENSOCUG00000026715 | ERLIN1   | 0,334631 |
| ENSOCUG00000012156 | ATF2     | 0,328285 |
| ENSOCUG00000002593 | PI4KB    | 0,328002 |
| ENSOCUG00000000810 | PRICKLE2 | 0,327973 |
| ENSOCUG00000005808 | PDLIM3   | 0,325466 |
| ENSOCUG00000016849 | GABPB1   | 0,325285 |
| ENSOCUG00000011193 | SYTL4    | 0,324195 |
| ENSOCUG00000003636 | TGM2     | 0,321104 |
| ENSOCUG00000011064 | CLSTN1   | 0,320646 |
| ENSOCUG00000007201 | RNF138   | 0,317277 |
| ENSOCUG00000007589 | TRAFD1   | 0,316336 |
| ENSOCUG00000011398 | PPP3CA   | 0,313303 |
| ENSOCUG00000005197 | ABR      | 0,309311 |
| ENSOCUG00000015226 | RETREG3  | 0,307644 |
| ENSOCUG00000010217 | PSMC2    | 0,307325 |
| ENSOCUG00000011947 | YEATS2   | 0,306676 |
| ENSOCUG00000002394 | WASF2    | 0,306108 |
| ENSOCUG00000008661 | ZNF706   | 0,305953 |
| ENSOCUG00000003479 | CD34     | 0,304555 |
| ENSOCUG00000010961 | RPL15    | 0,304399 |
| ENSOCUG00000029165 | DIS3L2   | 0,30365  |
| ENSOCUG00000006539 | ATP2B4   | 0,301742 |
| ENSOCUG00000022666 | AQP1     | 0,301256 |
| ENSOCUG00000004146 | ANXA2    | 0,300142 |
| ENSOCUG00000021712 | NFKB1    | 0,299349 |
| ENSOCUG00000015431 | DOCK10   | 0,298705 |
| ENSOCUG00000027213 | RHOC     | 0,298022 |
| ENSOCUG00000027712 | RPL3     | 0,296205 |
| ENSOCUG00000014568 | MTMR2    | 0,291549 |
| ENSOCUG00000004973 | DIAPH1   | 0,290722 |
| ENSOCUG00000007839 | IL6ST    | 0,286543 |
| ENSOCUG00000006695 | RBM4B    | 0,285995 |
| ENSOCUG00000017847 | TMTC2    | 0,285278 |
| ENSOCUG00000005101 | LAMB2    | 0,285132 |
| ENSOCUG00000017383 | MIGA1    | 0,284712 |
| ENSOCUG00000012354 | SNX25    | 0,282563 |
| ENSOCUG00000004012 | FBXO28   | 0,280275 |

|                     |         |          |
|---------------------|---------|----------|
| ENSOCUG00000005010  | ACSL4   | 0,279031 |
| ENSOCUG00000026099  | PMP22   | 0,278521 |
| ENSOCUG00000014503  | NCSTN   | 0,277348 |
| ENSOCUG00000012946  | KDM5A   | 0,275678 |
| ENSOCUG0000001711   | TRO     | 0,273894 |
| ENSOCUG00000006327  | EDC4    | 0,273794 |
| ENSOCUG00000011535  | GOLPH3  | 0,271188 |
| ENSOCUG00000005108  | UBTD2   | 0,270193 |
| ENSOCUG00000002897  | CUL9    | 0,269817 |
| ENSOCUG00000009155  | MAP3K1  | 0,269708 |
| ENSOCUG00000003285  | ELMO1   | 0,269407 |
| ENSOCUG00000002562  | PODN    | 0,269186 |
| ENSOCUG00000002495  | PIK3R4  | 0,268365 |
| ENSOCUG00000001620  | SND1    | 0,267043 |
| ENSOCUG00000004429  | TRIM38  | 0,265519 |
| ENSOCUG00000015698  | RARS    | 0,26246  |
| ENSOCUG00000004784  | MCM3AP  | 0,262193 |
| ENSOCUG00000001834  | ODF2L   | 0,261992 |
| ENSOCUG000000024739 | ZBED6   | 0,260548 |
| ENSOCUG00000007336  | TMX4    | 0,25641  |
| ENSOCUG00000008376  | UBA1    | 0,256034 |
| ENSOCUG00000006032  | KANSL3  | 0,255094 |
| ENSOCUG00000012396  | ZMYM3   | 0,252852 |
| ENSOCUG00000000919  | ADGRA3  | 0,251026 |
| ENSOCUG00000006967  | PPP1R21 | 0,249504 |
| ENSOCUG00000015963  | TGFBR2  | 0,249128 |
| ENSOCUG00000013582  | ARNT    | 0,24881  |
| ENSOCUG00000002809  | PTPRG   | 0,24863  |
| ENSOCUG00000013364  | COPZ1   | 0,248304 |
| ENSOCUG00000010472  | SLC30A5 | 0,246163 |
| ENSOCUG00000017525  | MED13L  | 0,24548  |
| ENSOCUG00000011357  | ITGA1   | 0,243546 |
| ENSOCUG00000012477  | DNPEP   | 0,240855 |
| ENSOCUG00000008062  | ABI2    | 0,24013  |
| ENSOCUG00000006510  | C9orf72 | 0,239951 |
| ENSOCUG00000009879  | STAG2   | 0,238021 |
| ENSOCUG00000008787  | RECQL   | 0,237881 |
| ENSOCUG00000012996  | MAP4K5  | 0,232453 |
| ENSOCUG00000006797  | MED12   | 0,229833 |
| ENSOCUG00000003781  | MAPRE2  | 0,22944  |
| ENSOCUG00000011300  | CYP4V2  | 0,229326 |
| ENSOCUG00000023881  | SEC24C  | 0,227569 |



|                     |            |          |
|---------------------|------------|----------|
| ENSOCUG00000013162  | MARC2      | 0,225246 |
| ENSOCUG00000001741  | FTO        | 0,225068 |
| ENSOCUG00000011678  | EXOC4      | 0,215885 |
| ENSOCUG00000017704  | TBC1D23    | 0,215763 |
| ENSOCUG00000004646  | RASA1      | 0,215403 |
| ENSOCUG00000004087  | SRSF7      | 0,214817 |
| ENSOCUG00000005516  | ARPC2      | 0,210868 |
| ENSOCUG00000000005  | MDM4       | 0,210408 |
| ENSOCUG00000000828  | FLNB       | 0,209278 |
| ENSOCUG00000017148  | RYK        | 0,204441 |
| ENSOCUG00000015460  | NBAS       | 0,201272 |
| ENSOCUG00000012765  | CEP192     | 0,19068  |
| ENSOCUG00000001943  | KCTD3      | 0,189263 |
| ENSOCUG00000012013  | DIP2B      | 0,188916 |
| ENSOCUG00000008757  | MYOF       | 0,183899 |
| ENSOCUG00000008940  | TRA2B      | 0,179067 |
| ENSOCUG00000012121  | U2SURP     | 0,174109 |
| ENSOCUG00000003815  | ZFX        | 0,16089  |
| ENSOCUG00000001155  | PDIA3      | 0,157678 |
| ENSOCUG00000008856  | HELZ       | 0,157542 |
| ENSOCUG00000008725  | VPS13B     | 0,138422 |
| ENSOCUG00000017819  | USP34      | 0,113389 |
| ENSOCUG00000003816  | HECTD1     | -0,11883 |
| ENSOCUG00000015231  | DCTN1      | -0,15232 |
| ENSOCUG00000013468  | XRN2       | -0,15689 |
| ENSOCUG00000015531  | CEP350     | -0,16047 |
| ENSOCUG00000002022  | RAB3GAP1   | -0,17314 |
| ENSOCUG00000008957  | NFX1       | -0,18342 |
| ENSOCUG00000007844  | SOS1       | -0,19111 |
| ENSOCUG00000008521  | YWHAG      | -0,19619 |
| ENSOCUG00000017692  | AL139011.2 | -0,19853 |
| ENSOCUG00000017619  | DNAJC3     | -0,19887 |
| ENSOCUG00000008495  | PSMD11     | -0,19927 |
| ENSOCUG00000003925  | KRR1       | -0,20187 |
| ENSOCUG00000008096  | RPRD1A     | -0,20255 |
| ENSOCUG00000004304  | DDX42      | -0,20339 |
| ENSOCUG000000025121 | ALDH6A1    | -0,2044  |
| ENSOCUG00000009935  | NBN        | -0,20531 |
| ENSOCUG00000014722  | CSNK2A1    | -0,20872 |
| ENSOCUG00000008145  | SMNDC1     | -0,20953 |
| ENSOCUG00000004346  | RBBP6      | -0,21658 |
| ENSOCUG00000004401  | MPDZ       | -0,21773 |

|                    |            |          |
|--------------------|------------|----------|
| ENSOCUG00000007258 | STRN       | -0,2231  |
| ENSOCUG00000006823 | APPL1      | -0,22487 |
| ENSOCUG00000006858 | SEH1L      | -0,22592 |
| ENSOCUG00000010995 | SNAP23     | -0,22642 |
| ENSOCUG00000007312 | CCDC82     | -0,22643 |
| ENSOCUG00000009297 | RAB6C      | -0,2285  |
| ENSOCUG00000001821 | ABCE1      | -0,22943 |
| ENSOCUG00000013847 | TCP1       | -0,23065 |
| ENSOCUG00000016756 | NEK1       | -0,23183 |
| ENSOCUG00000009541 | NFU1       | -0,23252 |
| ENSOCUG00000011751 | DPP8       | -0,23518 |
| ENSOCUG00000001753 | ZFYVE16    | -0,23692 |
| ENSOCUG00000002372 | PGRMC2     | -0,24056 |
| ENSOCUG00000015413 | PDCD10     | -0,24383 |
| ENSOCUG00000017240 | CDC5L      | -0,24481 |
| ENSOCUG00000008135 | GATAD2B    | -0,24736 |
| ENSOCUG00000006143 | DYNC1LI2   | -0,24911 |
| ENSOCUG00000016531 | AL512506.3 | -0,25    |
| ENSOCUG00000010945 | ISCA1      | -0,25251 |
| ENSOCUG00000001127 | RHOQ       | -0,25303 |
| ENSOCUG00000027628 | ARL14EP    | -0,25654 |
| ENSOCUG00000012457 | GOLGB1     | -0,25718 |
| ENSOCUG00000023995 | CUEDC2     | -0,2575  |
| ENSOCUG00000008134 | CHN1       | -0,25848 |
| ENSOCUG00000008565 | PSMD1      | -0,259   |
| ENSOCUG00000004330 | NRDC       | -0,25962 |
| ENSOCUG00000001047 | SMARCA1    | -0,26024 |
| ENSOCUG00000013302 | CTR9       | -0,26092 |
| ENSOCUG00000013470 | NDFIP2     | -0,2618  |
| ENSOCUG00000011619 | HBS1L      | -0,26204 |
| ENSOCUG00000001818 | KPNA4      | -0,26276 |
| ENSOCUG00000008615 | VAPA       | -0,26607 |
| ENSOCUG00000014783 | NSF        | -0,26667 |
| ENSOCUG00000014347 | AC090527.2 | -0,26848 |
| ENSOCUG00000029502 | MICU2      | -0,27086 |
| ENSOCUG00000000925 | GGNBP2     | -0,27213 |
| ENSOCUG00000029016 | IPO8       | -0,27254 |
| ENSOCUG00000003961 | TXNRD1     | -0,27266 |
| ENSOCUG00000006516 | ZEB1       | -0,27267 |
| ENSOCUG00000006735 | NMT1       | -0,273   |
| ENSOCUG00000002429 | CCT7       | -0,27542 |
| ENSOCUG00000017091 | MBIP       | -0,27564 |

|                     |         |          |
|---------------------|---------|----------|
| ENSOCUG00000015766  | PATJ    | -0,2763  |
| ENSOCUG00000017004  | TMEM182 | -0,28026 |
| ENSOCUG00000009768  | PHF20L1 | -0,28131 |
| ENSOCUG00000012875  | HSPA14  | -0,28417 |
| ENSOCUG00000017724  | IMPDH2  | -0,28764 |
| ENSOCUG00000014056  | DOCK5   | -0,28768 |
| ENSOCUG00000010755  | PLCB4   | -0,28825 |
| ENSOCUG00000004358  | CACYBP  | -0,29153 |
| ENSOCUG00000004392  | FOXN3   | -0,29467 |
| ENSOCUG00000008341  | ADHFE1  | -0,29499 |
| ENSOCUG00000003199  | LMAN1   | -0,29933 |
| ENSOCUG00000004533  | PTPN11  | -0,29942 |
| ENSOCUG00000000778  | DENND5B | -0,3072  |
| ENSOCUG000000022470 | DRG1    | -0,30914 |
| ENSOCUG00000001696  | DNAJC15 | -0,30966 |
| ENSOCUG00000003198  | MIPOL1  | -0,31105 |
| ENSOCUG00000008440  | FBXW7   | -0,31169 |
| ENSOCUG00000002637  | FAM122A | -0,31172 |
| ENSOCUG00000004815  | BAG2    | -0,31998 |
| ENSOCUG00000008020  | EYA3    | -0,32118 |
| ENSOCUG00000003055  | RNF115  | -0,32124 |
| ENSOCUG00000009762  | MTR     | -0,32507 |
| ENSOCUG00000000792  | EPS8    | -0,32605 |
| ENSOCUG000000024670 | ZNF770  | -0,33035 |
| ENSOCUG000000022143 | G3BP1   | -0,33131 |
| ENSOCUG00000015654  | TRAK1   | -0,33232 |
| ENSOCUG00000007950  | CPEB2   | -0,33259 |
| ENSOCUG00000016946  | KRCC1   | -0,33283 |
| ENSOCUG00000009575  | FAM96A  | -0,33658 |
| ENSOCUG00000001565  | MEA1    | -0,33874 |
| ENSOCUG00000004742  | USP25   | -0,34072 |
| ENSOCUG00000017915  | GUF1    | -0,34321 |
| ENSOCUG00000005077  | TOPORS  | -0,34383 |
| ENSOCUG00000012201  | PPAT    | -0,34924 |
| ENSOCUG00000017367  | KLHDC1  | -0,35246 |
| ENSOCUG00000017234  | GSR     | -0,35296 |
| ENSOCUG00000004281  | PTDSS1  | -0,35326 |
| ENSOCUG00000002748  | S100A13 | -0,3547  |
| ENSOCUG00000012582  | RAB21   | -0,35489 |
| ENSOCUG00000015750  | UBA5    | -0,35688 |
| ENSOCUG00000005872  | UBE2K   | -0,35851 |
| ENSOCUG00000007930  | ATF6    | -0,36081 |

|                    |            |          |
|--------------------|------------|----------|
| ENSOCUG00000002334 | SKA2       | -0,36098 |
| ENSOCUG00000015261 | SEPHS1     | -0,36186 |
| ENSOCUG00000006467 | NAA50      | -0,36302 |
| ENSOCUG00000000884 | POLR3B     | -0,36424 |
| ENSOCUG00000004757 | ZNF35      | -0,36437 |
| ENSOCUG00000016581 | RALA       | -0,36447 |
| ENSOCUG00000005288 | UBE2J1     | -0,36624 |
| ENSOCUG00000011635 | ACAD9      | -0,36724 |
| ENSOCUG00000026538 | PHB2       | -0,37072 |
| ENSOCUG00000012736 | HSPD1      | -0,37453 |
| ENSOCUG00000021196 | EPB41L3    | -0,37566 |
| ENSOCUG00000000004 | FGD1       | -0,37703 |
| ENSOCUG00000011189 | MRPL22     | -0,37785 |
| ENSOCUG00000013919 | FGD4       | -0,37911 |
| ENSOCUG00000008203 | NOP2       | -0,38257 |
| ENSOCUG00000011809 | RBMX2      | -0,38485 |
| ENSOCUG00000008393 | OSBPL1A    | -0,38664 |
| ENSOCUG00000004942 | PRKAA2     | -0,38687 |
| ENSOCUG00000000626 | AS3MT      | -0,38799 |
| ENSOCUG00000003639 | CREB5      | -0,3882  |
| ENSOCUG00000012693 | LDB3       | -0,38996 |
| ENSOCUG00000004551 | BEND7      | -0,39035 |
| ENSOCUG00000013637 | GPN1       | -0,39066 |
| ENSOCUG00000009953 | SLC25A13   | -0,39163 |
| ENSOCUG00000010928 | MRPL42     | -0,39227 |
| ENSOCUG00000006548 | ECHDC1     | -0,39459 |
| ENSOCUG00000011720 | MTHFD1     | -0,39747 |
| ENSOCUG00000012980 | AC093899.2 | -0,40232 |
| ENSOCUG00000014849 | CACNB2     | -0,40591 |
| ENSOCUG00000002694 | KPNA1      | -0,40694 |
| ENSOCUG00000004785 | DAP3       | -0,41033 |
| ENSOCUG00000016776 | SLC16A1    | -0,41104 |
| ENSOCUG00000006086 | LCLAT1     | -0,41159 |
| ENSOCUG00000012433 | ME2        | -0,41183 |
| ENSOCUG00000015156 | TWISTNB    | -0,41209 |
| ENSOCUG00000001598 | PAM        | -0,41276 |
| ENSOCUG00000010185 | ALDH7A1    | -0,41335 |
| ENSOCUG00000000968 | DES        | -0,41374 |
| ENSOCUG00000000285 | LBR        | -0,41628 |
| ENSOCUG00000006359 | NDUFS3     | -0,4163  |
| ENSOCUG00000015685 | SSX2IP     | -0,41763 |
| ENSOCUG00000013139 | BCKDHB     | -0,42375 |

|                    |                |          |
|--------------------|----------------|----------|
| ENSOCUG00000011265 | ZSCAN29        | -0,42501 |
| ENSOCUG00000000482 | NUDT6          | -0,42735 |
| ENSOCUG00000012393 | MCCC1          | -0,4274  |
| ENSOCUG00000001250 | EDNRA          | -0,42821 |
| ENSOCUG00000013943 | CISD2          | -0,42852 |
| ENSOCUG00000001981 | CNOT9          | -0,42861 |
| ENSOCUG00000006463 | PRKAG2         | -0,42954 |
| ENSOCUG00000016540 | ACAA2          | -0,42984 |
| ENSOCUG00000015820 | MXD1           | -0,43136 |
| ENSOCUG00000013720 | CLYBL          | -0,43138 |
| ENSOCUG00000007355 | DSG2           | -0,43163 |
| ENSOCUG00000008429 | CTNNA3         | -0,43183 |
| ENSOCUG00000022291 | GYPC           | -0,43258 |
| ENSOCUG00000015583 | RNF6           | -0,4347  |
| ENSOCUG00000017887 | NDUFB5         | -0,43534 |
| ENSOCUG00000025068 | KIF1C          | -0,43667 |
| ENSOCUG00000008250 | SAR1B          | -0,43685 |
| ENSOCUG00000025332 | RDH14          | -0,43687 |
| ENSOCUG00000004685 | ENY2           | -0,44053 |
| ENSOCUG00000009680 | HOMER1         | -0,4449  |
| ENSOCUG00000010554 | WDR46          | -0,44542 |
| ENSOCUG00000022791 | ART1           | -0,44559 |
| ENSOCUG00000012328 | RNF128         | -0,44846 |
| ENSOCUG00000012792 | THNSL1         | -0,45022 |
| ENSOCUG00000003038 | CRYZ           | -0,45132 |
| ENSOCUG00000001101 | SLC25A11       | -0,45157 |
| ENSOCUG00000004573 | TGIF2-C20orf24 | -0,45266 |
| ENSOCUG00000007239 | NDUFAF7        | -0,45298 |
| ENSOCUG00000016191 | PPFIBP1        | -0,45308 |
| ENSOCUG00000026462 | LUZP2          | -0,45419 |
| ENSOCUG00000014274 | MNAT1          | -0,45484 |
| ENSOCUG00000014535 | IMPA1          | -0,45797 |
| ENSOCUG00000007277 | GPALPP1        | -0,46096 |
| ENSOCUG00000003071 | LPIN1          | -0,46264 |
| ENSOCUG00000009899 | NDUFV2         | -0,46278 |
| ENSOCUG00000010438 | KLHL5          | -0,46282 |
| ENSOCUG00000006751 | LYPLA1         | -0,46327 |
| ENSOCUG00000010138 | POLR1A         | -0,46423 |
| ENSOCUG00000000790 | NDUFS4         | -0,46933 |
| ENSOCUG00000029140 | NDUFB4         | -0,47068 |
| ENSOCUG00000009450 | ARHGAP18       | -0,4768  |
| ENSOCUG00000000984 | ESRRG          | -0,47732 |

|                    |            |          |
|--------------------|------------|----------|
| ENSOCUG00000016980 | UTP6       | -0,47858 |
| ENSOCUG00000029590 | GSTM4      | -0,4799  |
| ENSOCUG00000026497 | MRPS14     | -0,48015 |
| ENSOCUG00000012376 | SUCLG2     | -0,48079 |
| ENSOCUG00000002231 | VLDLR      | -0,48296 |
| ENSOCUG00000006485 | MRPL39     | -0,48365 |
| ENSOCUG00000016362 | ADAMTS1    | -0,48636 |
| ENSOCUG00000003153 | TRIB2      | -0,48691 |
| ENSOCUG00000000827 | SLMAP      | -0,48759 |
| ENSOCUG00000009623 | AL049844.3 | -0,48777 |
| ENSOCUG00000010654 | ARHGAP24   | -0,48886 |
| ENSOCUG00000002249 | DHRS7      | -0,49006 |
| ENSOCUG00000006950 | CECR2      | -0,49185 |
| ENSOCUG00000014070 | ZNF697     | -0,49317 |
| ENSOCUG00000024341 | Mphosph6   | -0,49532 |
| ENSOCUG00000025658 | AAMDC      | -0,49548 |
| ENSOCUG00000012467 | NANS       | -0,49567 |
| ENSOCUG00000002882 | ACAT1      | -0,50057 |
| ENSOCUG00000006217 | CLEC16A    | -0,50135 |
| ENSOCUG00000015648 | PPP1R11    | -0,50452 |
| ENSOCUG00000014062 | TIMM21     | -0,50774 |
| ENSOCUG00000004067 | CNST       | -0,51094 |
| ENSOCUG00000003372 | ART3       | -0,51187 |
| ENSOCUG00000005016 | NT5C3A     | -0,51424 |
| ENSOCUG00000003001 | TNNI3K     | -0,51519 |
| ENSOCUG00000002780 | PANK1      | -0,51731 |
| ENSOCUG00000024043 | ATP5I      | -0,51733 |
| ENSOCUG00000006990 | PHF23      | -0,51805 |
| ENSOCUG00000003267 | ENSA       | -0,51896 |
| ENSOCUG00000009270 | SYNPO      | -0,52047 |
| ENSOCUG00000023095 | TRMT13     | -0,52075 |
| ENSOCUG00000024417 | NDUFS5     | -0,5228  |
| ENSOCUG00000021424 | VPS72      | -0,52382 |
| ENSOCUG00000025314 | GABRA4     | -0,52582 |
| ENSOCUG00000000989 | AL133352.1 | -0,52728 |
| ENSOCUG00000004834 | F3         | -0,52903 |
| ENSOCUG00000022295 | COX17      | -0,5296  |
| ENSOCUG00000015894 | PYURF      | -0,53378 |
| ENSOCUG00000007216 | CS         | -0,53556 |
| ENSOCUG00000009191 | SLC25A32   | -0,53999 |
| ENSOCUG00000008225 | LACTB2     | -0,54015 |
| ENSOCUG00000026215 | TMEM208    | -0,54767 |

|                    |            |          |
|--------------------|------------|----------|
| ENSOCUG00000023516 | KNOP1      | -0,54792 |
| ENSOCUG00000006998 | C11orf74   | -0,55288 |
| ENSOCUG00000009204 | SEC11C     | -0,55391 |
| ENSOCUG00000009581 | TACR3      | -0,55429 |
| ENSOCUG00000021735 | ITGA7      | -0,56014 |
| ENSOCUG00000000516 | NOLC1      | -0,56016 |
| ENSOCUG00000000141 | ACTR6      | -0,56086 |
| ENSOCUG00000010594 | CASQ2      | -0,56355 |
| ENSOCUG00000000164 | LAMTOR1    | -0,56392 |
| ENSOCUG00000016823 | COBL       | -0,5688  |
| ENSOCUG00000021716 | DHRS4L2    | -0,56942 |
| ENSOCUG00000029354 | MEF2C      | -0,57622 |
| ENSOCUG00000001030 | GEM        | -0,5799  |
| ENSOCUG00000014444 | HDAC9      | -0,57998 |
| ENSOCUG00000021458 | FAHD2A     | -0,58018 |
| ENSOCUG00000007642 | DEPTOR     | -0,58089 |
| ENSOCUG00000004163 | SLC25A33   | -0,58228 |
| ENSOCUG00000017713 | NUBPL      | -0,58664 |
| ENSOCUG00000015408 | ACYP2      | -0,59139 |
| ENSOCUG00000016954 | CCDC141    | -0,59415 |
| ENSOCUG00000014322 | MDH2       | -0,59596 |
| ENSOCUG00000002683 | TUFM       | -0,59638 |
| ENSOCUG00000026731 | HELLS      | -0,60278 |
| ENSOCUG00000004936 | NAV3       | -0,6037  |
| ENSOCUG00000006903 | SETD6      | -0,60442 |
| ENSOCUG00000001053 | THG1L      | -0,60756 |
| ENSOCUG00000009532 | AFF3       | -0,60922 |
| ENSOCUG00000002449 | LAMTOR5    | -0,61127 |
| ENSOCUG00000013506 | TCAIM      | -0,61585 |
| ENSOCUG00000013296 | GADD45G    | -0,61717 |
| ENSOCUG00000001383 | MRPL9      | -0,61793 |
| ENSOCUG00000013881 | XPA        | -0,61899 |
| ENSOCUG00000008900 | UBE2D4     | -0,61938 |
| ENSOCUG00000014894 | AC005833.3 | -0,62087 |
| ENSOCUG00000001952 | TIGAR      | -0,62149 |
| ENSOCUG00000007562 | BOLA2      | -0,62318 |
| ENSOCUG00000009230 | ATPAF1     | -0,62873 |
| ENSOCUG00000029598 | PINX1      | -0,6303  |
| ENSOCUG00000005617 | ACSL1      | -0,63162 |
| ENSOCUG00000026348 | KCNIP2     | -0,63202 |
| ENSOCUG00000012368 | NDUFS1     | -0,63871 |
| ENSOCUG00000027206 | HINT2      | -0,64056 |

|                    |            |          |
|--------------------|------------|----------|
| ENSOCUG00000006597 | CLGN       | -0,64638 |
| ENSOCUG00000001498 | CIAO1      | -0,6536  |
| ENSOCUG00000011557 | AC092718.8 | -0,66011 |
| ENSOCUG00000025335 | SYNPO2L    | -0,66059 |
| ENSOCUG00000021141 | APIP       | -0,66095 |
| ENSOCUG00000027853 | PGAM2      | -0,66125 |
| ENSOCUG00000017334 | PRDX3      | -0,66382 |
| ENSOCUG00000027846 | DNAJB5     | -0,67399 |
| ENSOCUG00000016473 | C2orf69    | -0,67511 |
| ENSOCUG00000005816 | SORBS2     | -0,67796 |
| ENSOCUG00000014369 | GCNT2      | -0,67995 |
| ENSOCUG00000013141 | BLOC1S2    | -0,68511 |
| ENSOCUG00000014618 | RGS10      | -0,68597 |
| ENSOCUG00000011552 | YEATS4     | -0,69153 |
| ENSOCUG00000017243 | FAR2       | -0,69365 |
| ENSOCUG00000002803 | C1orf52    | -0,69429 |
| ENSOCUG00000007427 | FAT3       | -0,6994  |
| ENSOCUG00000006748 | HEXIM1     | -0,70373 |
| ENSOCUG00000001676 | EZH2       | -0,71118 |
| ENSOCUG00000002682 | CCDC58     | -0,71881 |
| ENSOCUG00000017601 | CDH19      | -0,73237 |
| ENSOCUG00000002826 | CADPS      | -0,73596 |
| ENSOCUG00000017721 | NDUFAF3    | -0,73669 |
| ENSOCUG00000006901 | ANKRD1     | -0,73822 |
| ENSOCUG00000004074 | ACTC1      | -0,7387  |
| ENSOCUG00000001970 | AKAP3      | -0,75616 |
| ENSOCUG00000022444 | DECR1      | -0,75673 |
| ENSOCUG00000014414 | MYOT       | -0,76132 |
| ENSOCUG00000016658 | BOLA3      | -0,76238 |
| ENSOCUG00000003806 | KY         | -0,76427 |
| ENSOCUG00000013763 | DLGAP1     | -0,76512 |
| ENSOCUG00000007600 | UQCRH      | -0,76742 |
| ENSOCUG00000008892 | RAPSN      | -0,77091 |
| ENSOCUG00000017085 | COX5B      | -0,77169 |
| ENSOCUG00000002909 | GRB14      | -0,77188 |
| ENSOCUG00000001880 | MAGOH      | -0,77301 |
| ENSOCUG00000017178 | C8A        | -0,7756  |
| ENSOCUG00000004621 | SYT17      | -0,7776  |
| ENSOCUG00000025973 | Popdc3     | -0,77826 |
| ENSOCUG00000029345 | HMG5       | -0,77976 |
| ENSOCUG00000009113 | PDE1C      | -0,80678 |
| ENSOCUG00000014063 | TCEA3      | -0,81321 |



|                    |         |          |
|--------------------|---------|----------|
| ENSOCUG00000012207 | NEBL    | -0,81872 |
| ENSOCUG00000012422 | COX10   | -0,8221  |
| ENSOCUG00000013727 | TFB2M   | -0,82262 |
| ENSOCUG00000017002 | MDGA2   | -0,83825 |
| ENSOCUG0000001082  | CLIP4   | -0,84663 |
| ENSOCUG00000005261 | MRPS36  | -0,85959 |
| ENSOCUG00000013627 | UQCRQ   | -0,87711 |
| ENSOCUG00000013113 | GDPD1   | -0,88447 |
| ENSOCUG00000013155 | HHATL   | -0,88616 |
| ENSOCUG00000005512 | RXRG    | -0,88642 |
| ENSOCUG00000006322 | NUTF2   | -0,90422 |
| ENSOCUG00000009324 | GJA1    | -0,91815 |
| ENSOCUG00000020895 | VGLL3   | -0,92629 |
| ENSOCUG00000022531 | CLIC5   | -0,93527 |
| ENSOCUG00000008858 | CORIN   | -0,95966 |
| ENSOCUG00000013780 | METTL18 | -0,97617 |
| ENSOCUG00000023345 | PTRH2   | -0,97666 |
| ENSOCUG00000015216 | LRRC3B  | -0,97739 |
| ENSOCUG00000022262 | ST8SIA5 | -0,98827 |
| ENSOCUG00000006264 | NMNAT3  | -1,00201 |
| ENSOCUG00000025456 | MAP7    | -1,00258 |
| ENSOCUG00000016138 | GRPEL2  | -1,00778 |
| ENSOCUG00000006103 | CENPQ   | -1,01045 |
| ENSOCUG00000026304 | C2orf40 | -1,027   |
| ENSOCUG00000011459 | RYR3    | -1,03775 |
| ENSOCUG00000019739 | SNORD87 | -1,05895 |
| ENSOCUG00000024444 | CRHR2   | -1,06724 |
| ENSOCUG00000006020 | PHEX    | -1,06894 |
| ENSOCUG00000002174 | TEX12   | -1,07013 |
| ENSOCUG00000014052 | LSAMP   | -1,0745  |
| ENSOCUG00000025915 | MRPL48  | -1,08565 |
| ENSOCUG00000002752 | S100A1  | -1,10533 |
| ENSOCUG00000016858 | NKAPL   | -1,13185 |
| ENSOCUG00000006775 | ANO2    | -1,13342 |
| ENSOCUG00000017458 | NEB     | -1,16658 |
| ENSOCUG00000016105 | COLQ    | -1,16697 |
| ENSOCUG00000019290 | mir-30a | -1,16709 |
| ENSOCUG00000022110 | TCEAL7  | -1,168   |
| ENSOCUG00000021581 | CETN2   | -1,17284 |
| ENSOCUG00000011793 | C1QTNF9 | -1,17521 |
| ENSOCUG00000021989 | NDUFA3  | -1,19557 |
| ENSOCUG00000006498 | DSG1    | -1,21142 |

|                    |               |          |
|--------------------|---------------|----------|
| ENSOCUG00000023908 | 4930503B20Rik | -1,22686 |
| ENSOCUG00000017236 | LRRC2         | -1,22743 |
| ENSOCUG00000009032 | CA14          | -1,22881 |
| ENSOCUG00000006752 | MEST          | -1,22923 |
| ENSOCUG00000027251 | C1orf54       | -1,24745 |
| ENSOCUG00000024952 | SNORD71       | -1,29528 |
| ENSOCUG00000025586 | MYL2          | -1,32108 |
| ENSOCUG00000018756 | SNORA4        | -1,33339 |
| ENSOCUG00000009843 | SPOCK1        | -1,35872 |
| ENSOCUG00000013450 | MYH11         | -1,36065 |
| ENSOCUG00000016280 | CXCL10        | -1,40318 |
| ENSOCUG00000027477 | TIMM8A        | -1,43643 |
| ENSOCUG00000001788 | RASGRP1       | -1,44729 |
| ENSOCUG00000008188 | LMOD3         | -1,53238 |
| ENSOCUG00000019311 | SNORD65       | -1,55584 |
| ENSOCUG00000007663 | MRO           | -1,55673 |
| ENSOCUG00000001849 | SMPX          | -1,58397 |
| ENSOCUG00000027484 | PPP1R3E       | -1,62163 |
| ENSOCUG00000017551 | XIRP2         | -1,70959 |
| ENSOCUG00000014210 | HNRNPA1L2     | -1,75053 |
| ENSOCUG00000021483 | SNORD121A     | -1,79976 |
| ENSOCUG00000008469 | MOXD1         | -1,81034 |
| ENSOCUG00000008305 | CELA1         | -1,83856 |
| ENSOCUG00000018248 | snRNA         | -1,87263 |
| ENSOCUG00000000737 | NR4A3         | -1,88179 |
| ENSOCUG00000023253 | SNORD47       | -2,14709 |
| ENSOCUG00000017742 | FHL5          | -2,16602 |
| ENSOCUG00000016623 | FGFBP1        | -2,18782 |
| ENSOCUG00000024035 | SNORD74       | -2,28694 |
| ENSOCUG00000019647 | SNORA26       | -2,33283 |
| ENSOCUG00000022519 | MXD3          | -2,59024 |
| ENSOCUG00000017645 | GALNT13       | -2,74425 |
| ENSOCUG00000027750 | RPL21         | -3,78025 |
| ENSOCUG00000024282 | PLEKHB2       | -4,41459 |

**Table S2:** Sequences of primers used for qPCR.

| Gene           | Forward (5'-3')        | Reverse (5'-3')         |
|----------------|------------------------|-------------------------|
| <i>SNORA63</i> | CCTGCTCAAAGTAAGGTTGTTC | AGGGATAGAGCAGACAGGTATAG |
| <i>COL1A2</i>  | ATGGTGGCACCCAGTTTGAA   | GTGCAGCCATCGACAAGAAC    |
| <i>MGP</i>     | GCGAACACCTTTATGTCGCC   | ACCATGGCATAGCGTTCACA    |
| <i>RPL11</i>   | GTCTGAAGGTGCGGGAGTAT   | TAGATGCCGATGCTTGGGTC    |
| <i>HAPLN1</i>  | CCCGTGAAGTTTGCACGAAGT  | CCAGGAATCTTCCTCACTGGTC  |
| <i>MIR107</i>  | TTACAGTGTTGCCTTGTGGC   | TAGCCCTGTAAATGCTGCT     |
